# Supplementary material for: Molecular insights into the unusually promiscuous and catalytically versatile Fe(II)/α-ketoglutarate-dependent oxygenase SptF
Source: PubMed Central journal article supplement (PMC8748661; doi:10.1038/s41467-021-27636-3), 2022-01-10
Supplement: 41467_2021_27636_MOESM1_ESM.pdf [file 41467_2021_27636_MOESM1_ESM.pdf]

*Supplementary Information*

**Molecular insights into the unusually promiscuous and catalytically versatile**

**Fe(II)/ $\alpha$ -ketoglutarate-dependent oxygenase SptF**

Hui Tao<sup>1,5</sup>, Takahiro Mori<sup>1,2,3,5,\*</sup>, Heping Chen<sup>1</sup>, Shuang Lyu<sup>1</sup>, Akihito Nonoyama<sup>4</sup>, Shoukou Lee<sup>4</sup>,

Ikuro Abe<sup>1,2,\*</sup>

<sup>1</sup> Graduate School of Pharmaceutical Sciences, The University of Tokyo, Tokyo, Japan

<sup>2</sup> Collaborative Research Institute for Innovative Microbiology, The University of Tokyo, Tokyo, Japan

<sup>3</sup> PRESTO, Japan Science and Technology Agency, Saitama, Japan

<sup>4</sup> Sumitomo Dainippon Pharma Co., Ltd., Osaka, Japan

<sup>5</sup> These authors contributed equally

\*Address correspondence to [tmori@mol.f.u-tokyo.ac.jp](mailto:tmori@mol.f.u-tokyo.ac.jp) or [abei@mol.f.u-tokyo.ac.jp](mailto:abei@mol.f.u-tokyo.ac.jp)

**Table of Contents**

|                                   |                |
|-----------------------------------|----------------|
| <b>Supplementary Methods</b>      | <b>S1-S2</b>   |
| <b>Supplementary Tables 1-20</b>  | <b>S3-S23</b>  |
| <b>Supplementary Figures 1-94</b> | <b>S24-S79</b> |
| <b>Supplementary References</b>   | <b>S80</b>     |

## Supplementary Methods

### Chemical properties of key products:

Compound **4**: white powder,  $[\alpha]_D^{26}$  -30.7 (*c* 0.03, MeOH). HRMS  $m/z$  441.1915  $[M + H]^+$  (*calc.* 441.1908 for  $C_{25}H_{29}O_7$ ) (Supplementary Fig. 2).  $^1H$  and  $^{13}C$  NMR data, see Supplementary Table 7; NMR spectrum, see Supplementary Figs. 19-24.

Compound **5**: white powder,  $[\alpha]_D^{26}$  -22.6 (*c* 0.04, MeOH). HRMS  $m/z$  441.1907  $[M + H]^+$  (*calc.* 441.1908 for  $C_{25}H_{29}O_7$ ) (Supplementary Fig. 2).  $^1H$  and  $^{13}C$  NMR data, see Supplementary Table 8; NMR spectrum, see Supplementary Figs. 25-30.

Compound **8**: white powder,  $[\alpha]_D^{26}$  +15.8 (*c* 0.02, MeOH). HRMS  $m/z$  427.2113  $[M + H]^+$  (*calc.* 427.2115 for  $C_{25}H_{31}O_6$ ) (Supplementary Fig. 2).  $^1H$  and  $^{13}C$  NMR data, see Supplementary Table 9; NMR spectrum, see Supplementary Figs. 31-36.

Compound **9**: white powder,  $[\alpha]_D^{26}$  -20.3 (*c* 0.04, MeOH). HRMS  $m/z$  427.2115  $[M + H]^+$  (*calc.* 427.2115 for  $C_{25}H_{31}O_6$ ) (Supplementary Fig. 2).  $^1H$  and  $^{13}C$  NMR data, see Supplementary Table 10; NMR spectrum, see Supplementary Figs. 37-42.

Compound **11**: white powder,  $[\alpha]_D^{26}$  -22.2 (*c* 0.08, MeOH). HRMS  $m/z$  429.2259  $[M + H]^+$  (*calc.* 429.2272 for  $C_{25}H_{33}O_6$ ) (Supplementary Fig. 2).  $^1H$  and  $^{13}C$  NMR data, see Supplementary Table 11; NMR spectrum, see Supplementary Figs. 43-48.

Compound **14**: white powder,  $[\alpha]_D^{26}$  -17.8 (*c* 0.05, MeOH). HRMS  $m/z$  430.2243  $[M + NH_4]^+$  (*calc.* 430.2224 for  $C_{24}H_{32}NO_6$ ) (Supplementary Fig. 2).  $^1H$  and  $^{13}C$  NMR data, see Supplementary Table 12; NMR spectrum, see Supplementary Figs. 49-54.

Compound **16**: white powder,  $[\alpha]_D^{26}$  -88.4 (*c* 0.08, MeOH). HRMS  $m/z$  429.1899  $[M + H]^+$  (*calc.* 429.1908 for  $C_{24}H_{29}O_7$ ) (Supplementary Fig. 2).  $^1H$  and  $^{13}C$  NMR data, see Supplementary Table 13; NMR spectrum, see Supplementary Figs. 55-60.

Compound **22**: white powder, HRMS  $m/z$  307.2254  $[M + H]^+$  (*calc.* 307.2268 for  $C_{19}H_{31}O_3$ ) (Supplementary Fig. 2).  $^1H$  and  $^{13}C$  NMR data, see Supplementary Table 14; NMR spectrum, see Supplementary Figs. 61-66.

Compound **23**: white powder, HRMS  $m/z$  323.2215  $[M + H]^+$  (*calc.* 323.2217 for  $C_{19}H_{31}O_4$ ) (Supplementary Fig. 2).  $^1H$  and  $^{13}C$  NMR data, see Supplementary Table 15; NMR spectrum, see Supplementary Figs. 67-72.

Compound **25**: white powder, HRMS  $m/z$  305.2115  $[M + H]^+$  (*calc.* 305.2111 for  $C_{19}H_{29}O_3$ ) (Supplementary Fig. 2).  $^1H$  and  $^{13}C$  NMR data, see Supplementary Table 16; NMR spectrum, see Supplementary Figs. 73-76.

Crystalline sponge data, see Supplementary Table 4 and Supplementary Fig. 4.



Compound **26/27**: white powder, HRMS  $m/z$  303.1963  $[M + H]^+$  (*calc.* 303.1955 for  $C_{19}H_{27}O_3$ ) (Supplementary Fig. 2).  $^1H$  and  $^{13}C$  NMR data, see Supplementary Table 17; NMR spectrum, see Supplementary Figs. 77-82.

Compound **32**: white powder,  $[\alpha]_D^{26}$  -80.5 (*c* 0.03, MeOH). HRMS  $m/z$  427.2122  $[M + H]^+$  (*calc.* 427.2115 for  $C_{25}H_{31}O_6$ ) (Supplementary Fig. 2)  $^1H$  and  $^{13}C$  NMR data, see Supplementary Table 18; NMR spectrum, see Supplementary Figs. 83-88.

Compound **33**: white powder,  $[\alpha]_D^{26}$  -25.3 (*c* 0.11, MeOH). HRMS  $m/z$  411.2171  $[M + H]^+$  (*calc.* 411.2166 for  $C_{25}H_{31}O_5$ ) (Supplementary Fig. 2).  $^1H$  and  $^{13}C$  NMR data, see Supplementary Table 19; NMR spectrum, see Supplementary Figs. 89-94.

## Supplementary Tables

**Supplementary Table 1. Results of  $^{18}\text{O}$ -labeling experiment.**

|                                                               | emervaridone C ( <b>3</b> ) (%)                  |                                                  |                                                  |                                   |                                   |
|---------------------------------------------------------------|--------------------------------------------------|--------------------------------------------------|--------------------------------------------------|-----------------------------------|-----------------------------------|
|                                                               | $m/z = 426$<br>[M+NH <sub>4</sub> ] <sup>+</sup> | $m/z = 428$<br>[M+NH <sub>4</sub> ] <sup>+</sup> | $m/z = 430$<br>[M+NH <sub>4</sub> ] <sup>+</sup> |                                   |                                   |
| H <sub>2</sub> O/ <sup>18</sup> O <sub>2</sub>                | 2.2 ± 0.1                                        | 97.8 ± 0.1                                       | –                                                |                                   |                                   |
| H <sub>2</sub> <sup>18</sup> O/O <sub>2</sub>                 | 95.6 ± 0.3                                       | 4.4 ± 0.3                                        | –                                                |                                   |                                   |
| H <sub>2</sub> <sup>18</sup> O / <sup>18</sup> O <sub>2</sub> | 1.3 ± 0.2                                        | 92.0 ± 0.8                                       | 6.8 ± 0.6                                        |                                   |                                   |
| H <sub>2</sub> <sup>18</sup> O without enzyme                 | 94.6 ± 0.2                                       | 5.4 ± 0.2                                        | –                                                |                                   |                                   |
|                                                               | <b>4</b> (%)                                     |                                                  |                                                  |                                   |                                   |
|                                                               | $m/z = 441$<br>[M+H] <sup>+</sup>                | $m/z = 443$<br>[M+H] <sup>+</sup>                | $m/z = 445$<br>[M+H] <sup>+</sup>                | $m/z = 447$<br>[M+H] <sup>+</sup> | $m/z = 449$<br>[M+H] <sup>+</sup> |
| H <sub>2</sub> O/ <sup>18</sup> O <sub>2</sub>                | –                                                | 1.1 ± 0.3                                        | 8.6 ± 0.8                                        | 90.3 ± 1.1                        | –                                 |
| H <sub>2</sub> <sup>18</sup> O/O <sub>2</sub>                 | 95.0 ± 0.9                                       | 5.0 ± 0.9                                        | –                                                | –                                 | –                                 |
| H <sub>2</sub> <sup>18</sup> O / <sup>18</sup> O <sub>2</sub> | –                                                | 0.9 ± 0.1                                        | 4.8 ± 0.0                                        | 92.1 ± 0.3                        | 2.2 ± 0.2                         |
| H <sub>2</sub> <sup>18</sup> O without enzyme                 | 100% ± 0                                         | –                                                | –                                                | –                                 | –                                 |
|                                                               | <b>5</b> (%)                                     |                                                  |                                                  |                                   |                                   |
|                                                               | $m/z = 441$<br>[M+H] <sup>+</sup>                | $m/z = 443$<br>[M+H] <sup>+</sup>                | $m/z = 445$<br>[M+H] <sup>+</sup>                | $m/z = 447$<br>[M+H] <sup>+</sup> | $m/z = 449$<br>[M+H] <sup>+</sup> |
| H <sub>2</sub> O/ <sup>18</sup> O <sub>2</sub>                | –                                                | 0.9 ± 0.2                                        | 3.4 ± 0.3                                        | 95.7 ± 0.4                        | –                                 |
| H <sub>2</sub> <sup>18</sup> O/O <sub>2</sub>                 | 98.6 ± 0.3                                       | 1.4 ± 0.3                                        | –                                                | –                                 | –                                 |
| H <sub>2</sub> <sup>18</sup> O / <sup>18</sup> O <sub>2</sub> | –                                                | 0.8 ± 0.0                                        | 3.1 ± 0.2                                        | 95.1 ± 0.1                        | 1.0 ± 0.0                         |
| H <sub>2</sub> <sup>18</sup> O without enzyme                 | 99.8 ± 0.1                                       | 0.2 ± 0.1                                        | –                                                | –                                 | –                                 |

H<sub>2</sub><sup>18</sup>O without enzyme is incubating compound **3**, **4**, or **5** with 78% H<sub>2</sub><sup>18</sup>O without SptF, and other conditions are the same as labeling experiments except for the absence of enzyme. All reactions were performed in triplicate.

**Supplementary Table 2.** Conversion rate of unnatural substrates by SptF

| Substrate | conversion rate (%) |
|-----------|---------------------|
| <b>10</b> | 51.0 ± 1.8          |
| <b>13</b> | 30.8 ± 2.9          |
| <b>15</b> | 26.6 ± 0.4          |
| <b>17</b> | 5.6 ± 0.7           |
| <b>19</b> | 9.8 ± 1.8           |
| <b>21</b> | 35.8 ± 0.7          |
| <b>24</b> | 34.3 ± 3.0          |
| <b>28</b> | 52.6 ± 1.3          |

Reactions were performed on a 50- $\mu$ L scale with 50 mM PIPES (pH 7.5), 0.2 mM FeSO<sub>4</sub>, 5 mM  $\alpha$ -ketoglutarate, 4 mM ascorbate, 100  $\mu$ M of substrate, and 15  $\mu$ M of wild-type or mutant SptF at 30 °C over 24 hrs. All reactions were performed in triplicate.

**Supplementary Table 3.** Data collection and refinement statistics.

|                                                     | SptF-apo                | SptF- $\alpha$ KG/1      | SptF $\Delta$ 9          | SptF N65T-<br>NOG/1      | SptF-NOG/6              | SptF S114A-<br>NOG/15   |
|-----------------------------------------------------|-------------------------|--------------------------|--------------------------|--------------------------|-------------------------|-------------------------|
| <b>Data collection</b>                              |                         |                          |                          |                          |                         |                         |
| Space group                                         | P1                      | P1                       | C2                       | P1                       | P1                      | P1                      |
| Cell dimensions                                     |                         |                          |                          |                          |                         |                         |
| <i>a</i> , <i>b</i> , <i>c</i> (Å)                  | 49.6, 72.7, 79.0        | 49.4, 72.3, 77.6         | 90.2, 52.3,<br>57.8      | 42.8, 50.6, 72.0         | 50.0, 72.6,<br>78.9     | 49.7, 72.3, 78.5        |
| $\alpha$ , $\beta$ , $\gamma$ (°)                   | 82.1, 84.9, 70.1        | 81.6, 85.6, 70.2         | 90, 99.4, 90             | 109.1, 91.3,<br>112.9    | 81.7, 84.2,<br>70.2     | 81.9, 84.9, 70.4        |
| Resolution (Å)                                      | 48.6-2.1<br>(2.18-2.12) | 47.7-1.95<br>(1.99-1.95) | 45.1-1.40<br>(1.42-1.40) | 44.6-2.05<br>(2.11-2.05) | 48.4-2.1<br>(2.16-2.10) | 48.2-2.1<br>(2.16-2.10) |
| <i>R</i> <sub>merge</sub> (%)                       | 9.8 (44.1)              | 8.5 (40.3)               | 3.6 (37.4)               | 17.6 (45.5)              | 13.8 (45.6)             | 6.5 (63.2)              |
| <i>I</i> / $\sigma$ <i>I</i>                        | 10.4 (3.1)              | 7.8 (2.4)                | 12.4 (2.2)               | 7.1 (3.5)                | 5.7 (2.5)               | 7.3 (1.8)               |
| Completeness (%)                                    | 97.6 (93.5)             | 97.0 (95.7)              | 99.7 (99.5)              | 96.2 (95.7)              | 94.3 (95.1)             | 97.6 (96.2)             |
| Redundancy                                          | 5.4 (5.3)               | 3.6 (3.8)                | 3.8 (3.9)                | 4.2 (4.2)                | 3.3 (3.6)               | 2.1 (2.1)               |
| <b>Refinement</b>                                   |                         |                          |                          |                          |                         |                         |
| Resolution (Å)                                      | 46.6-2.1                | 47.7-1.95                | 45.1-1.4                 | 27.9-2.05                | 48.4-2.1                | 48.2-2.1                |
| No. reflections                                     | 56648                   | 70467                    | 52217                    | 31219                    | 56650                   | 57781                   |
| <i>R</i> <sub>work</sub> / <i>R</i> <sub>free</sub> | 19.4/24.8               | 21.6/26.5                | 16.6/18.8                | 24.0/27.8                | 23.6/28.6               | 20.6/25.6               |
| No. atoms                                           |                         |                          |                          |                          |                         |                         |
| Protein                                             | 8783                    | 8602                     | 2193                     | 4303                     | 8531                    | 8465                    |
| Ligand/ion                                          | 4                       | 40                       | 11                       | 41                       | 44                      | 75                      |
| Water                                               | 487                     | 483                      | 317                      | 294                      | 443                     | 376                     |
| <i>B</i> -factors                                   |                         |                          |                          |                          |                         |                         |
| Protein                                             | 26.9                    | 29.4                     | 15.9                     | 16.8                     | 28.1                    | 34.9                    |
| Ligand/ion                                          | 50.4                    | 27.2                     | 13.1                     | 17.1                     | 28.2                    | 40.2                    |
| Water                                               | 29.8                    | 30.8                     | 27.8                     | 20.1                     | 28.9                    | 36.0                    |
| R.m.s. deviations                                   |                         |                          |                          |                          |                         |                         |
| Bond lengths (Å)                                    | 0.002                   | 0.004                    | 0.006                    | 0.003                    | 0.002                   | 0.002                   |
| Bond angles (°)                                     | 0.532                   | 0.682                    | .951                     | 0.634                    | 0.595                   | 0.567                   |

\*Data was collected from one crystal. \*Values in parentheses are for highest-resolution shell.

**Supplementary Table 4.** Kinetic parameters measured in this study.

|       | Andiconin D (1)                        |                         |                                                            | Terretonin C (15)                      |                         |                                                            |
|-------|----------------------------------------|-------------------------|------------------------------------------------------------|----------------------------------------|-------------------------|------------------------------------------------------------|
|       | $k_{\text{cat}}$ ( $\text{min}^{-1}$ ) | $K_M$ ( $\mu\text{M}$ ) | $k_{\text{cat}}/K_M$ ( $\text{min}^{-1}\mu\text{M}^{-1}$ ) | $k_{\text{cat}}$ ( $\text{min}^{-1}$ ) | $K_M$ ( $\mu\text{M}$ ) | $k_{\text{cat}}/K_M$ ( $\text{min}^{-1}\mu\text{M}^{-1}$ ) |
| SptF  | $9.85 \pm 0.53$                        | $1.51 \pm 0.31$         | 6.52                                                       | $0.18 \pm 0.004$                       | $67.95 \pm 4.13$        | 0.003                                                      |
| N65A  | $4.10 \pm 0.23$                        | $8.65 \pm 1.73$         | 0.47                                                       | $0.14 \pm 0.006$                       | $16.30 \pm 2.65$        | 0.008                                                      |
| I63A  |                                        | N.D.                    |                                                            | $0.10 \pm 0.003$                       | $17.04 \pm 2.26$        | 0.006                                                      |
| Del9  |                                        | N.D.                    |                                                            | $0.12 \pm 0.007$                       | $32.70 \pm 6.34$        | 0.004                                                      |
| F133A | $0.25 \pm 0.01$                        | $46.88 \pm 6.31$        | 0.005                                                      |                                        | N.D.                    |                                                            |

  

|       | 3                                      |                         |                                                            | Andilesin C (6)                        |                         |                                                            |
|-------|----------------------------------------|-------------------------|------------------------------------------------------------|----------------------------------------|-------------------------|------------------------------------------------------------|
|       | $k_{\text{cat}}$ ( $\text{min}^{-1}$ ) | $K_M$ ( $\mu\text{M}$ ) | $k_{\text{cat}}/K_M$ ( $\text{min}^{-1}\mu\text{M}^{-1}$ ) | $k_{\text{cat}}$ ( $\text{min}^{-1}$ ) | $K_M$ ( $\mu\text{M}$ ) | $k_{\text{cat}}/K_M$ ( $\text{min}^{-1}\mu\text{M}^{-1}$ ) |
| SptF  | $0.68 \pm 0.10$                        | $77.07 \pm 27.40$       | 0.009                                                      | $14.71 \pm 0.22$                       | $1.15 \pm 0.08$         | 12.79                                                      |
| F133A |                                        | N.D.                    |                                                            | $0.21 \pm 0.01$                        | $29.33 \pm 4.79$        | 0.007                                                      |

Note: N.D. means not determined due to low activity. All reactions were performed in triplicate and plot for each measurement was shown as follows:

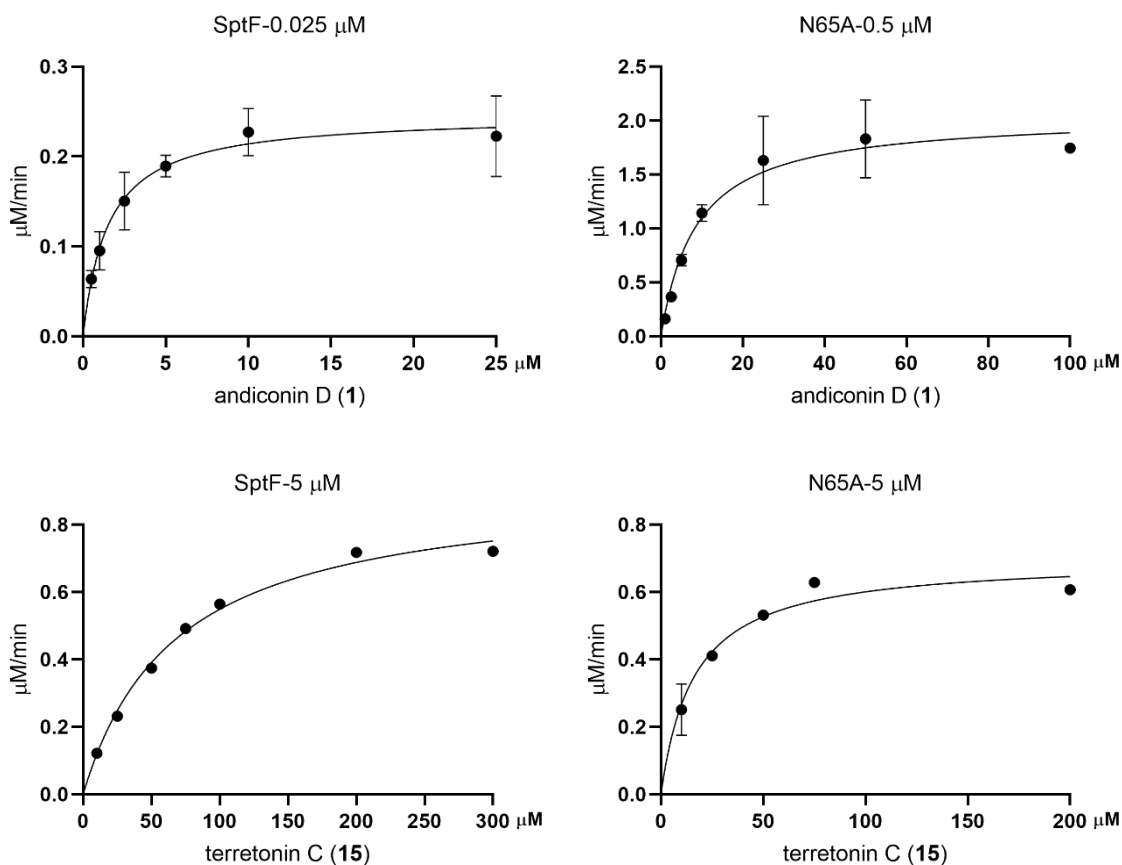

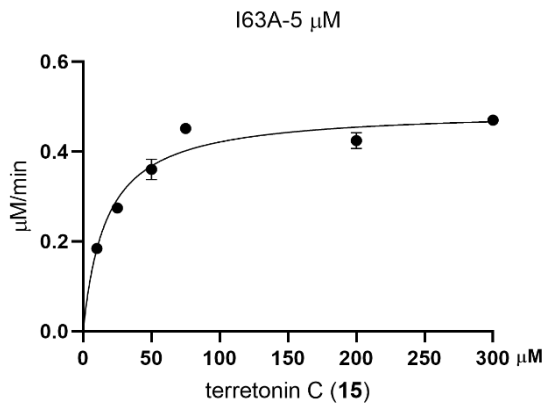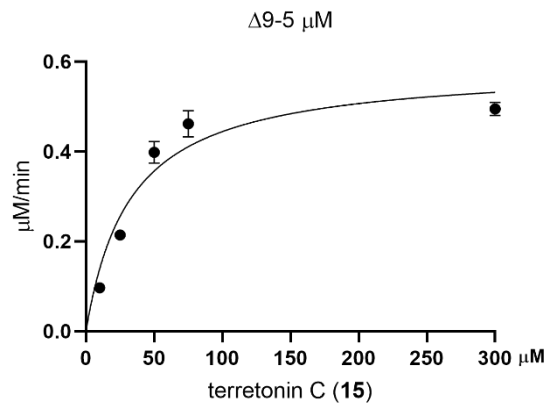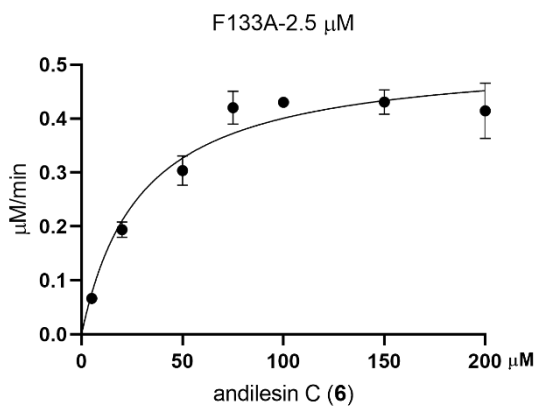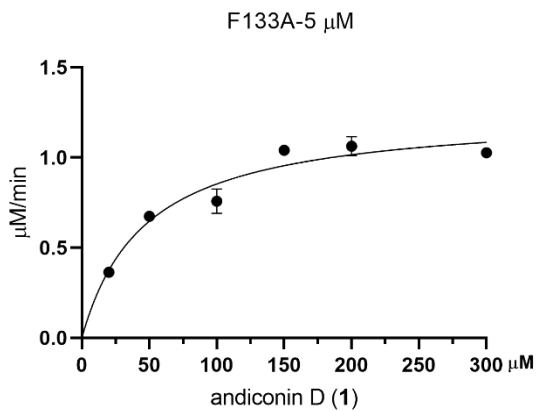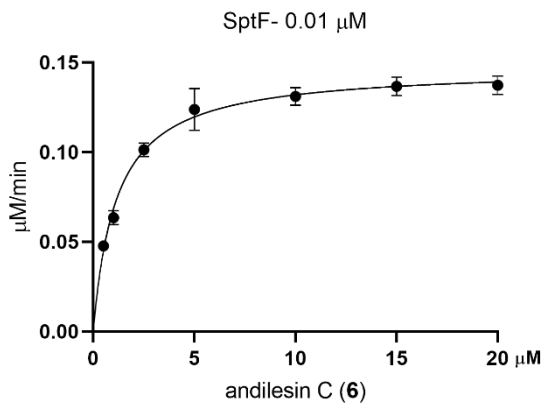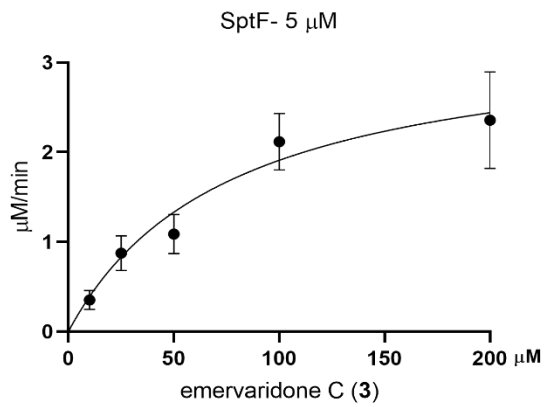

**Supplementary Table 5.** Crystal data and structure refinement for compounds **25**

|                                                              |                                                                                                            |
|--------------------------------------------------------------|------------------------------------------------------------------------------------------------------------|
| Empirical formula                                            | C <sub>118.33</sub> H <sub>125.04</sub> Cl <sub>12</sub> N <sub>24</sub> O <sub>4.68</sub> Zn <sub>6</sub> |
| Molecular weight                                             | 2775.94                                                                                                    |
| Crystal system                                               | monoclinic                                                                                                 |
| Space group                                                  | C2                                                                                                         |
| Lattice parameters: <i>a</i> , <i>b</i> , <i>c</i> , $\beta$ | 32.8346(8) Å, 14.4445(2) Å, 30.7569(8) Å, 100.966(2)°                                                      |
| Unit cell volume                                             | 14321.0(6) Å <sup>3</sup>                                                                                  |
| Formula units per unit cell                                  | 4                                                                                                          |
| $R_{int}$                                                    | 5.85%                                                                                                      |
| Number of parameters                                         | 2094                                                                                                       |
| Number of restraints                                         | 1843                                                                                                       |
| $R_1$                                                        | 9.77%                                                                                                      |
| $wR_2$                                                       | 31.03%                                                                                                     |
| Goof <i>S</i>                                                | 1.197                                                                                                      |
| Flack parameters                                             | 0.122(10)                                                                                                  |
| CCDC number                                                  | 2090716                                                                                                    |

**Supplementary Table 6.** Substrates consumption by SptF truncation mutants.

| Substrate | conversion rate (%) |                      |                      |                       |
|-----------|---------------------|----------------------|----------------------|-----------------------|
|           | SptF wild-type      | $\Delta$ 6 (H61-V66) | $\Delta$ 9 (K58-V66) | $\Delta$ 16 (N54-K69) |
| <b>1</b>  | 100 $\pm$ 0.0       | 79.9 $\pm$ 0.5       | 93.6 $\pm$ 1.0       | 61.4 $\pm$ 3.2        |
| <b>2</b>  | 100 $\pm$ 0.0       | 37.9 $\pm$ 1.3       | 57.6 $\pm$ 1.0       | 16.5 $\pm$ 0.9        |
| <b>3</b>  | 100 $\pm$ 0.0       | 39.9 $\pm$ 0.9       | 55.7 $\pm$ 1.2       | 25.8 $\pm$ 4.8        |
| <b>6</b>  | 100 $\pm$ 0.0       | 48.2 $\pm$ 1.5       | 74.6 $\pm$ 0.6       | 20.7 $\pm$ 0.3        |
| <b>10</b> | 90.7 $\pm$ 2.5      | 30.5 $\pm$ 5.5       | 25.8 $\pm$ 3.0       | 22.1 $\pm$ 2.4        |
| <b>13</b> | 39.3 $\pm$ 9.8      | 32.6 $\pm$ 7.1       | 22.3 $\pm$ 5.0       | 22.1 $\pm$ 4.1        |
| <b>15</b> | 47.0 $\pm$ 0.9      | 22.1 $\pm$ 1.0       | 25.9 $\pm$ 0.8       | 18.8 $\pm$ 1.5        |
| <b>21</b> | 94.4 $\pm$ 0.7      | 3.7 $\pm$ 0.6        | 3.9 $\pm$ 2.1        | 4.0 $\pm$ 1.8         |
| <b>24</b> | 83.5 $\pm$ 1.2      | 7.7 $\pm$ 2.4        | 16.4 $\pm$ 2.1       | 14.0 $\pm$ 3.5        |
| <b>28</b> | 90.4 $\pm$ 1.3      | 4.6 $\pm$ 0.1        | 5.4 $\pm$ 0.4        | 3.8 $\pm$ 0.2         |

Reactions were performed on a 50- $\mu$ L scale with 50 mM PIPES (pH 7.5), 0.2 mM FeSO<sub>4</sub>, 5 mM  $\alpha$ -ketoglutarate, 4 mM ascorbate, 100  $\mu$ M of substrate, and 40  $\mu$ M of wild-type or mutant SptF at 30 °C over 24 hrs. All reactions were performed in triplicate.



**Supplementary Table 7.** Primers used in this study.

| Primers                   | Sequence (5' to 3')                   |
|---------------------------|---------------------------------------|
| SptF-N3-F                 | GGAGATATACATATGCCCAACTTCATTATGTGCCTTA |
| SptF-N3-R                 | TGCTCGAGCATGCAAAAAAGCC                |
| I63A-F                    | TACAACCACGACGCCAAAAATGTGG             |
| I63A-R                    | CCACATTTTTGGCGTCGTGGTTGTA             |
| N65T-F                    | CCACGACATCAAACTGTGGGCTCGAAAACC        |
| N65T-R                    | CGAGCCCACAGTTTTGATGTCTGGTTG           |
| N65A-F                    | CCACGACATCAAAGCTGTGGGCTCG             |
| N65A-R                    | CGAGCCCACAGCTTTGATGTCTGG              |
| S114A-F                   | AACGGTGGCGCTATCCTCCATCTTG             |
| S114A-R                   | CAAGATGGAGGATAGCGCCACCGTT             |
| F133A-F                   | GGACCATGTGGCCTATCAAATCAGCAAGTGGCG     |
| F133A-R                   | GCTGATTTGATAGGCCACATGGTCCTGGTGGATTG   |
| F133Y-F                   | GGACCATGTGTACTATCAAATCAGCAAGTGGCG     |
| F133Y-R                   | GCTGATTTGATAGTACACATGGTCCTGGTGGATTG   |
| T148A-F                   | ATCCCACCTTGCCATCAACTTCACGATGGCAC      |
| T148A-R                   | GTGCCATCGTGAAGTTGATGGCAAGGTCGGGAT     |
| T148S-F                   | ATCCCACCTTAGCATCAACTTCACGATGGCAC      |
| T148S-R                   | GTGCCATCGTGAAGTTGATGCTAAGGTCGGGAT     |
| N150A-F                   | ACCTTACCATCGCCTTCACGATGGC             |
| N150A-R                   | GCCATCGTGAAGGCGATGGTAAGGT             |
| I231A-F                   | TTACCCCAGCCGAGAGTCACCACCACTTAC        |
| I231A-R                   | TGGTGGTGACTCTCGGCTGGGGTAAAGTGAC       |
| loop truncation (61-66)-F | AAAATACAACGGCTCGAAAACCAAGCAGCC        |
| loop truncation (61-66)-R | TTCGAGCCGTTGTATTTTGGGCCGGGATTC        |
| loop truncation (58-66)-F | CCGGCCCAGGCTCGAAAACCAAGCAGCC          |
| loop truncation (58-66)-R | TTTTCGAGCCTGGGCCGGGATTCCAGTTGC        |
| loop truncation (54-69)-F | CGCAACTGGACCAAGCAGCCATCCAACCTC        |
| loop truncation (54-69)-R | CTGCTTGGTCCAGTTGCGAACGTAGTCGTC        |
| loop truncation (53-71)-F | GTTCGCAACCAGCCATCCAACCTCAGCTT         |
| loop truncation (53-71)-R | GGATGGCTGGTTGCGAACGTAGTCGTC AAC       |

Supplementary Table 8. NMR data of compound 4.

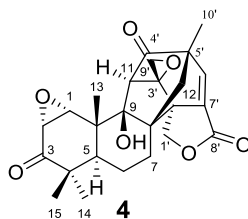

| position    | $\delta_{\text{H}}$ (mult., $J$ in Hz) | $\delta_{\text{C}}$ , type | COSY                        | HMBC                 | NOESY                                 |
|-------------|----------------------------------------|----------------------------|-----------------------------|----------------------|---------------------------------------|
| 1           | 3.59 (d, 4.5)                          | 64.3, CH                   | H-2                         | 5                    | H-11, 13                              |
| 2           | 3.33 (d, 4.5)                          | 56.2, CH                   | H-1                         | 3, 10, 12            |                                       |
| 3           |                                        | 213.9, C                   |                             |                      |                                       |
| 4           |                                        | 45.2, C                    |                             |                      |                                       |
| 5           | 2.98 (dd, 13.5, 4.0)                   | 40.1, CH                   | H-6 $\alpha$ , 6 $\beta$    | 6, 13                | H-6 $\alpha$ , 7 $\alpha$ , 14        |
| 6 $\alpha$  | 1.72 (m)                               | 21.2, CH <sub>2</sub>      | H-5, 7 $\alpha$ , 7 $\beta$ |                      | H-5, 7 $\alpha$ , 14                  |
| 6 $\beta$   | 1.64 (qd, 13.5, 3.4)                   |                            | H-5, 7 $\alpha$ , 7 $\beta$ |                      | H-7 $\beta$ , 15, 12' $\beta$         |
| 7 $\alpha$  | 2.13 (dt, 12.3, 4.0)                   | 29.9, CH <sub>2</sub>      | H-6 $\alpha$ , 6 $\beta$    | 8, 12                | H-5, 6 $\alpha$ , 1' $\beta$          |
| 7 $\beta$   | 1.57 (dt, 12.3, 3.4)                   |                            | H-6 $\alpha$ , 6 $\beta$    | 5, 9                 | H-6 $\beta$ , 1' $\beta$ , 9' $\beta$ |
| 8           |                                        | 53.5, C                    |                             |                      |                                       |
| 9           |                                        | 87.5, C                    |                             |                      |                                       |
| 10          |                                        | 46.1, C                    |                             |                      |                                       |
| 11          | 3.10 (s)                               | 71.8, CH                   |                             | 8, 9, 2', 3', 4', 5' | H-1, 13, 9' $\alpha$                  |
| 12 $\alpha$ | 2.87 (d, 14.5)                         | 45.8, CH <sub>2</sub>      |                             | 9, 2', 5', 6', 10'   | H-6 $\beta$ , 13, 10'                 |
| 12 $\beta$  | 1.32 (d, 14.5)                         |                            |                             | 7, 8, 9, 4', 5', 6'  | H-7 $\beta$                           |
| 13          | 1.03 (s)                               | 19.6, CH <sub>3</sub>      |                             | 1, 4, 5, 9           | H-1, 11, 12 $\beta$ , 10'             |
| 14          | 1.13 (s)                               | 28.1, CH <sub>3</sub>      |                             | 3, 4, 5              | H-5, 6 $\alpha$                       |
| 15          | 1.04 (s)                               | 21.1, CH <sub>3</sub>      |                             | 4, 14                | H-6 $\beta$                           |
| 1' $\alpha$ | 4.49 (d, 9.9)                          | 69.2, CH <sub>2</sub>      |                             | 2', 3', 7', 8'       | H-9' $\beta$                          |
| 1' $\beta$  | 4.37 (d, 9.9)                          |                            |                             | 8, 2', 3'            | H-7 $\alpha$ , 7 $\beta$              |
| 2'          |                                        | 55.9, C                    |                             |                      |                                       |
| 3'          |                                        | 77.1, C                    |                             |                      |                                       |
| 4'          |                                        | 205.6, C                   |                             |                      |                                       |
| 5'          |                                        | 51.7, C                    |                             |                      |                                       |
| 6'          | 6.87 (s)                               | 145.6, CH                  |                             | 2', 3', 5', 8', 10'  | H-1 $\alpha$ , 10'                    |
| 7'          |                                        | 141.5, C                   |                             |                      |                                       |
| 8'          |                                        | 169.8, C                   |                             |                      |                                       |
| 9' $\alpha$ | 2.64 (d, 3.6)                          | 47.8, CH <sub>2</sub>      |                             |                      | H-11                                  |
| 9' $\beta$  | 2.31 (d, 3.6)                          |                            |                             |                      | H-1' $\alpha$                         |
| 10'         | 1.38 (s)                               | 20.8, CH <sub>3</sub>      |                             | 12, 4', 5', 6'       |                                       |

<sup>1</sup>H 800 MHz, <sup>13</sup>C 200 MHz (CD<sub>3</sub>OD)

Supplementary Table 9. NMR data of compound 5.

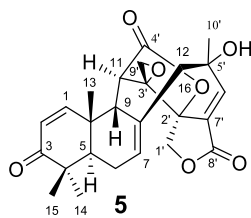

| position    | $\delta_{\text{H}}$ (mult., $J$ in Hz) | $\delta_{\text{C}}$ , type | COSY                     | HMBC                     | NOESY                                  |
|-------------|----------------------------------------|----------------------------|--------------------------|--------------------------|----------------------------------------|
| 1           | 6.91 (d, 10.3)                         | 159.5, CH                  | H-2                      | 3, 5, 9                  | H-2, 9, 11, 13                         |
| 2           | 6.01 (d, 10.3)                         | 128.9, CH                  | H-1                      | 10                       | H-1                                    |
| 3           |                                        | 206.5, C                   |                          |                          |                                        |
| 4           |                                        | 45.4, C                    |                          |                          |                                        |
| 5           | 1.35 (dd, 6.3, 11.0)                   | 42.4 CH                    | H-6 $\alpha$ , 6 $\beta$ | 4, 6, 9, 13, 15          | H-6 $\alpha$ , 11, 14, 9' $\alpha$     |
| 6 $\alpha$  | 2.20 (m)                               | 26.1, CH <sub>2</sub>      | H-5, 7                   | 5, 7, 8                  | H-5, 7, 14                             |
| 6 $\beta$   | 2.04 (m)                               |                            | H-5, 7                   | 7, 8                     | H-7, 13, 15                            |
| 7           | 5.73 (m)                               | 133.5, CH                  | H-6 $\alpha$ , 6 $\beta$ | 5, 9, 12                 | H-6 $\alpha$ , 6 $\beta$ , 12 $\alpha$ |
| 8           |                                        | 131.5, C                   |                          |                          |                                        |
| 9           | 2.86 (s)                               | 54.8, CH                   |                          | 5, 8, 11, 12, 13, 3', 4' | H-1, 12 $\beta$ , 13                   |
| 10          |                                        | 42.9, C                    |                          |                          |                                        |
| 11          | 2.90 (s)                               | 46.4, CH                   |                          | 8, 9, 10, 2', 3', 4', 9' | H-1, 5, 9' $\alpha$                    |
| 12 $\alpha$ | 2.65 (d, 14.9)                         | 54.0, CH <sub>2</sub>      |                          | 7, 8, 9                  | H-7, 10'                               |
| 12 $\beta$  | 2.50 (m)                               |                            |                          | 8, 5', 6'                | H-9, 10'                               |
| 13          | 1.16 (s)                               | 20.4, CH <sub>3</sub>      |                          | 1, 9, 10                 | H-1, 6 $\beta$ , 9, 12 $\beta$ , 15    |
| 14          | 1.07 (s)                               | 24.7, CH <sub>3</sub>      |                          | 3, 4, 5, 15              | H-5, 6 $\alpha$ , 9' $\alpha$          |
| 15          | 1.05 (s)                               | 21.7, CH <sub>3</sub>      |                          | 3, 4, 5                  | H-6 $\beta$ , 13                       |
| 1' $\alpha$ | 4.47 (d, 9.8)                          | 71.4, CH <sub>2</sub>      |                          | 2', 3', 7', 8'           | H-9' $\beta$                           |
| 1' $\beta$  | 4.25 (d, 9.8)                          |                            |                          | 2', 3'                   |                                        |
| 2'          |                                        | 84.1, C                    |                          |                          |                                        |
| 3'          |                                        | 68.3, C                    |                          |                          |                                        |
| 4'          |                                        | 178.1, C                   |                          |                          |                                        |
| 5'          |                                        | 74.6, C                    |                          |                          |                                        |
| 6'          | 7.04 (s)                               | 153.1, CH                  |                          | 2', 5', 7', 8', 10'      | H-12 $\alpha$ , 10'                    |
| 7'          |                                        | 127.3, C                   |                          |                          |                                        |
| 8'          |                                        | 170.4, C                   |                          |                          |                                        |
| 9' $\alpha$ | 2.71 (d, 3.7)                          | 53.4, CH <sub>2</sub>      |                          |                          | H-5, 11, 14                            |
| 9' $\beta$  | 3.19 (d, 3.7)                          |                            |                          |                          | H-1' $\alpha$                          |
| 10'         | 1.45 (s)                               | 31.6, CH <sub>3</sub>      |                          | 8, 12, 5', 6', 7'        | H-12 $\alpha$ , 12 $\beta$ , 6'        |

$^1\text{H}$  800 MHz,  $^{13}\text{C}$  200 MHz (CD<sub>3</sub>OD)

Supplementary Table 10. NMR data of compound 8.

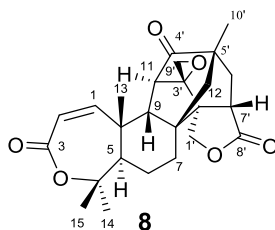

| position    | $\delta_{\text{H}}$ (mult., $J$ in Hz) | $\delta_{\text{C}}$ , type | COSY                        | HMBC                      | NOESY                                    |
|-------------|----------------------------------------|----------------------------|-----------------------------|---------------------------|------------------------------------------|
| 1           | 5.81 (d, 12.7)                         | 147.5, CH                  | H-2                         | 5, 9, 13                  | H-2, 9, 11, 13                           |
| 2           | 5.96 (d, 12.7)                         | 120.8, CH                  | H-1                         | 3, 5                      | H-1                                      |
| 3           |                                        | 166.3, C                   |                             |                           |                                          |
| 4           |                                        | 83.4, C                    |                             |                           |                                          |
| 5           | 2.60 (m)                               | 42.5, CH                   | H-6 $\alpha$ , 6 $\beta$    | 4, 6, 7, 9, 10, 13, 15    | H-6 $\alpha$ , 14, 1' $\alpha$           |
| 6 $\alpha$  | 1.75 (m)                               | 21.0, CH <sub>2</sub>      | H-5, 7 $\alpha$ , 7 $\beta$ | 10                        | H-5, 7 $\alpha$ , 14, 1' $\beta$         |
| 6 $\beta$   | 1.57 (m)                               |                            | H-5, 7 $\beta$              |                           | H-12 $\beta$ , 13                        |
| 7 $\alpha$  | 2.05 (m)                               | 25.7, CH <sub>2</sub>      | H-6 $\alpha$                | 8, 9                      | H-1' $\beta$                             |
| 7 $\beta$   | 1.87 (m)                               |                            | H-6 $\alpha$ , 6 $\beta$    |                           | H-13                                     |
| 8           |                                        | 47.7, C                    |                             |                           |                                          |
| 9           | 1.79 (s)                               | 63.0, CH                   |                             | 8, 10, 11, 12, 13, 2', 3' | H-1, 11, 12 $\beta$ , 13                 |
| 10          |                                        | 42.5, C                    |                             |                           |                                          |
| 11          | 2.58 (s)                               | 62.0, CH                   |                             | 8, 2', 3', 5'             | H-1, 9, 9' $\alpha$                      |
| 12 $\alpha$ | 2.02 (d, 13.3)                         | 50.4, CH <sub>2</sub>      |                             | 7, 8, 9, 4', 6'           | H-7'                                     |
| 12 $\beta$  | 1.41 (d, 13.3)                         |                            |                             | 9, 6'                     |                                          |
| 13          | 1.34 (s)                               | 26.4, CH <sub>3</sub>      |                             | 1, 9, 10                  | H-1, 6 $\beta$ , 7 $\beta$ , 9, 15       |
| 14          | 1.41 (s)                               | 30.8, CH <sub>3</sub>      |                             | 4, 14                     | H-5, 6 $\alpha$ , 1' $\alpha$            |
| 15          | 1.50 (s)                               | 23.3, CH <sub>3</sub>      |                             | 4, 5, 15                  | H-12 $\beta$ , 13                        |
| 1' $\alpha$ | 4.69 (d, 8.5)                          | 70.8, CH <sub>2</sub>      |                             | 2', 3', 7', 8'            | H-5, 6 $\alpha$ , 14                     |
| 1' $\beta$  | 4.24 (d, 8.5)                          |                            |                             | 2'                        | H-6 $\alpha$ , 7 $\alpha$                |
| 2'          |                                        | 64.5, C                    |                             |                           |                                          |
| 3'          |                                        | 52.8, C                    |                             |                           |                                          |
| 4'          |                                        | 208.8, C                   |                             |                           |                                          |
| 5'          |                                        | 44.9, C                    |                             |                           |                                          |
| 6' $\alpha$ | 1.83 (m)                               | 29.5, CH <sub>2</sub>      | H-7'                        | 4', 5', 7', 10'           | H-10'                                    |
| 6' $\beta$  | 1.25 (m)                               |                            |                             |                           |                                          |
| 7'          | 3.04 (dd, 10.7, 8.5)                   | 41.6, CH                   | H-6' $\alpha$               | 2', 3', 6', 8'            | H-12 $\alpha$ , 6' $\alpha$ , 1' $\beta$ |
| 8'          |                                        | 174.4, C                   |                             |                           |                                          |
| 9' $\alpha$ | 2.83 (d, 3.0)                          | 48.1, CH <sub>2</sub>      |                             |                           | H-1' $\alpha$ , 6' $\alpha$              |
| 9' $\beta$  | 2.80 (d, 3.0)                          |                            |                             |                           | H-11, 6' $\alpha$                        |
| 10'         | 1.16 (s)                               | 23.7, CH <sub>3</sub>      |                             | 12, 4', 5', 6'            | H-12 $\alpha$ , 12 $\beta$               |

<sup>1</sup>H 800 MHz, <sup>13</sup>C 200 MHz (CDCl<sub>3</sub>)

Supplementary Table 11. NMR data of compound 9.

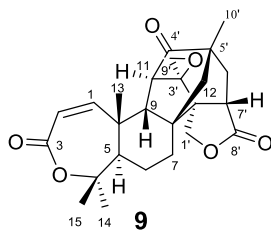

| position    | $\delta_{\text{H}}$ (mult., $J$ in Hz) | $\delta_{\text{C}}$ , type | COSY                       | HMBC               | NOESY                                   |
|-------------|----------------------------------------|----------------------------|----------------------------|--------------------|-----------------------------------------|
| 1           | 5.94 (d, 12.7)                         | 148.3, CH                  | H-2                        | 2, 5               | H-2, 11, 13                             |
| 2           | 6.02(d, 12.7)                          | 120.4, CH                  | H-1                        | 1, 10              | H-1                                     |
| 3           |                                        | 166.0, C                   |                            |                    |                                         |
| 4           |                                        | 83.8, C                    |                            |                    |                                         |
| 5           | 2.29 (m)                               | 45.1, CH                   | H-6 $\alpha$ , 6 $\beta$   | 4, 6, 7, 9, 10, 15 | H-6 $\alpha$ , 14, 1' $\alpha$          |
| 6 $\alpha$  | 1.77 (m)                               | 21.2, CH <sub>2</sub>      | H-5, 7 $\beta$             | 7, 10              | H-7 $\alpha$ , 14                       |
| 6 $\beta$   | 1.59 (m)                               |                            | H-5                        |                    | H-6 $\beta$                             |
| 7 $\alpha$  | 1.99 (m)                               | 26.2, CH <sub>2</sub>      |                            | 9, 12              | H-1' $\beta$                            |
| 7 $\beta$   | 1.81 (m)                               |                            | H-6 $\alpha$               |                    | H-13                                    |
| 8           |                                        | 44.9, C                    |                            |                    |                                         |
| 9           | 1.71 (s)                               | 61.2, CH                   |                            | 5, 7, 10, 12, 4'   | H-12 $\beta$ , 13                       |
| 10          |                                        | 42.8, C                    |                            |                    |                                         |
| 11          | 2.56 (s)                               | 60.1, CH                   |                            | 10, 2', 3', 4', 9' | H-1, 9, 9' $\beta$                      |
| 12 $\alpha$ | 2.04 (d, 13.3)                         | 50.3, CH <sub>2</sub>      |                            | 9, 13, 4', 5', 6'  | H-7'                                    |
| 12 $\beta$  | 1.41 (d, 13.3)                         |                            |                            | 9, 13, 5', 6'      |                                         |
| 13          | 1.35 (s)                               | 26.1, CH <sub>3</sub>      |                            | 1, 5, 9, 10        | H-6 $\beta$ , 7 $\beta$ , 9, 15         |
| 14          | 1.41 (s)                               | 30.9, CH <sub>3</sub>      |                            | 4, 5, 15           | H-5, 6 $\alpha$                         |
| 15          | 1.51 (s)                               | 23.2, CH <sub>3</sub>      |                            | 4, 5, 14           | H-13                                    |
| 1' $\alpha$ | 4.37 (d, 9.3)                          | 73.6, CH <sub>2</sub>      |                            | 2', 3', 7', 8'     | H-5, 9' $\alpha$                        |
| 1' $\beta$  | 4.29 (d, 9.3)                          |                            |                            | 2'                 | H-7 $\alpha$ , 7'                       |
| 2'          |                                        | 67.0, C                    |                            |                    |                                         |
| 3'          |                                        | 50.6, C                    |                            |                    |                                         |
| 4'          |                                        | 208.2, C                   |                            |                    |                                         |
| 5'          |                                        | 45.1, C                    |                            |                    |                                         |
| 6' $\alpha$ | 2.21 (m)                               | 29.9, CH <sub>2</sub>      | H-7'                       | 12, 4', 7', 8'     |                                         |
| 6' $\beta$  | 1.80 (m)                               |                            | H-7'                       | 4', 5', 7', 10'    | H-7', 10'                               |
| 7'          | 2.90 (dd, 10.7, 8.1)                   | 41.9, CH                   | H-6' $\alpha$ , 6' $\beta$ | 2', 3', 6', 8'     | H-12 $\alpha$ , 6' $\beta$ , 1' $\beta$ |
| 8'          |                                        | 173.5, C                   |                            |                    |                                         |
| 9' $\alpha$ | 3.13 (d, 4.2)                          | 53.2, CH <sub>2</sub>      |                            | 2'                 | H-1' $\alpha$                           |
| 9' $\beta$  | 2.80 (d, 4.2)                          |                            |                            | 11, 2'             | H-11                                    |
| 10'         | 1.19 (s)                               | 24.1, CH <sub>3</sub>      |                            | 12, 4', 5', 6'     | H-12 $\alpha$ , 12 $\beta$ , 6' $\beta$ |

$^1\text{H}$  900 MHz,  $^{13}\text{C}$  225 MHz (CDCl<sub>3</sub>)

Supplementary Table 12. NMR data of compound 11.

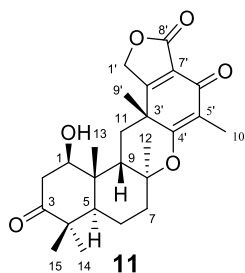

| position    | $\delta_{\text{H}}$ (mult., $J$ in Hz) | $\delta_{\text{C}}$ , type | COSY                        | HMBC         | NOESY                                  |
|-------------|----------------------------------------|----------------------------|-----------------------------|--------------|----------------------------------------|
| 1           | 4.26 (d, 9.4)                          | 70.0, CH                   | H-2 $\beta$                 | 3            | H-2 $\beta$ , 5, 11 $\alpha$ , 12      |
| 2 $\alpha$  | 3.19 (dd, 16.3, 9.4)                   | 46.4, CH <sub>2</sub>      |                             | 1, 3         | H-1, 5, 14                             |
| 2 $\beta$   | 2.17 (d, 16.3)                         |                            | H-1                         | 1, 3         |                                        |
| 3           |                                        | 215.6, C                   |                             |              |                                        |
| 4           |                                        | 46.4, C                    |                             |              |                                        |
| 5           | 1.72 (m)                               | 44.3, CH                   | H-6 $\beta$                 | 1, 13, 14    | H-1, 2 $\alpha$ , 12, 14               |
| 6 $\alpha$  | 1.66 (m)                               | 17.7, CH <sub>2</sub>      | H-7 $\alpha$                | 8            |                                        |
| 6 $\beta$   | 1.76 (m)                               |                            | H-5, 7 $\alpha$ , 7 $\beta$ |              |                                        |
| 7 $\alpha$  | 1.99 (m)                               | 37.9, CH <sub>2</sub>      | H-6 $\alpha$ , 6 $\beta$    |              | H-6 $\alpha$ , 12                      |
| 7 $\beta$   | 2.30 (dd, 14.0, 8.3)                   |                            | H-6 $\beta$                 | 8            | H-6 $\beta$                            |
| 8           |                                        | 85.2, C                    |                             |              |                                        |
| 9           | 2.23 (dd, 13.3, 2.6)                   | 44.1, CH                   | H-11 $\alpha$ , 11 $\beta$  |              | H-6 $\beta$ , 13, 9'                   |
| 10          |                                        | 41.3, C                    |                             |              |                                        |
| 11 $\alpha$ | 1.92 (t, 13.3)                         | 31.8, CH <sub>2</sub>      | H-9                         | 9'           | H-1, 12                                |
| 11 $\beta$  | 2.08 (dd, 13.3, 2.6)                   |                            | H-9                         |              | H-13, 9'                               |
| 12          | 1.35 (s)                               | 75.7, CH <sub>3</sub>      |                             | 7, 8, 9      | H-1, 5, 7 $\alpha$ , 11 $\alpha$ , 10' |
| 13          | 0.94 (s)                               | 16.3, CH <sub>3</sub>      |                             | 1, 5, 9      |                                        |
| 14          | 1.08 (s)                               | 29.5, CH <sub>3</sub>      |                             | 3, 5, 15     | H-2 $\alpha$ , H-5, 6 $\alpha$         |
| 15          | 1.12 (s)                               | 19.7, CH <sub>3</sub>      |                             | 3, 4, 14, 9' | H-6 $\beta$ , 13                       |
| 1' $\alpha$ | 4.97 (d, 18.3)                         | 67.1, CH <sub>2</sub>      |                             | 6'           |                                        |
| 1' $\beta$  | 4.93 (d, 18.3)                         |                            |                             | 6'           | H-9'                                   |
| 2'          |                                        | 121.1, C                   |                             |              |                                        |
| 3'          |                                        | 39.9, C                    |                             |              |                                        |
| 4'          |                                        | 169.6, C                   |                             |              |                                        |
| 5'          |                                        | 122.8, C                   |                             |              |                                        |
| 6'          |                                        | 180.4, C                   |                             |              |                                        |
| 7'          |                                        | 167.9, C                   |                             |              |                                        |
| 8'          |                                        | 161.2, C                   |                             |              |                                        |
| 9'          | 1.52 (s)                               | 26.9, CH <sub>3</sub>      |                             | 3', 4', 11   | H-9, 11 $\beta$ , 1' $\beta$           |
| 10'         | 1.83 (s)                               | 8.2, CH <sub>3</sub>       |                             | 4', 5', 6'   | H-12                                   |

<sup>1</sup>H 900 MHz, <sup>13</sup>C 225 MHz (CDCl<sub>3</sub>)

Supplementary Table 13. NMR data of compound 14.

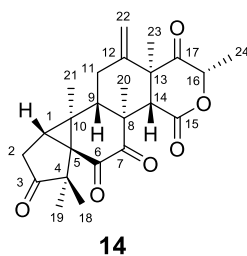

| position    | $\delta_{\text{H}}$ (mult., $J$ in Hz) | $\delta_{\text{C}}$ , type | COSY                       | HMBC                         | NOESY                           |
|-------------|----------------------------------------|----------------------------|----------------------------|------------------------------|---------------------------------|
| 1           | 2.22 (d, 6.2)                          | 38.7, CH                   | H-2 $\beta$                | 2, 3, 5, 6, 9                | H-2 $\beta$ , 9                 |
| 2 $\alpha$  | 2.44 (d, 18.8)                         | 36.5, CH <sub>2</sub>      |                            | 3, 4, 5, 10                  | H-21, 22b                       |
| 2 $\beta$   | 2.94 (dd, 18.8, 6.2)                   |                            | H-1                        | 1, 3, 10                     | H-1, 18                         |
| 3           |                                        | 215.9, C                   |                            |                              |                                 |
| 4           |                                        | 51.9, C                    |                            |                              |                                 |
| 5           |                                        | 50.7, C                    |                            |                              |                                 |
| 6           |                                        | 199.5, C                   |                            |                              |                                 |
| 7           |                                        | 201.1, C                   |                            |                              |                                 |
| 8           |                                        | 52.0, C                    |                            |                              |                                 |
| 9           | 1.67 (dd, 13.1, 3.8)                   | 54.3, CH                   | H-11 $\alpha$ , 11 $\beta$ |                              | H-1, 11 $\beta$ , 14            |
| 10          |                                        | 37.3, C                    |                            |                              |                                 |
| 11 $\alpha$ | 2.79 (t, 13.1)                         | 32.6, CH <sub>2</sub>      | H-9                        | 8, 9, 12, 22                 | H-20, 21, 23                    |
| 11 $\beta$  | 2.54 (dd, 13.7, 3.8)                   |                            | H-9                        | 8, 9, 13                     | H-9, 22b                        |
| 12          |                                        | 142.3, C                   |                            |                              |                                 |
| 13          |                                        | 49.3, C                    |                            |                              |                                 |
| 14          | 3.34 (s)                               | 47.9, CH                   |                            | 7, 8, 12, 13, 15, 17, 20, 23 | H-9, 16                         |
| 15          |                                        | 167.9, C                   |                            |                              |                                 |
| 16          | 5.01 (q, 6.5)                          | 77.8, CH                   | H-24                       | 24                           | H-14, 24                        |
| 17          |                                        | 206.4, C                   |                            |                              |                                 |
| 18          | 1.56 (s)                               | 26.6, CH <sub>3</sub>      |                            | 3, 4, 5, 19                  | H-2 $\beta$                     |
| 19          | 1.35 (s)                               | 19.2, CH <sub>3</sub>      |                            | 3, 4, 5, 18                  | H-20, 21                        |
| 20          | 1.79 (s)                               | 11.9, CH <sub>3</sub>      |                            | 7, 8, 9, 14                  | H-11 $\alpha$ , 21, 23          |
| 21          | 1.16 (s)                               | 12.7, CH <sub>3</sub>      |                            | 1, 5, 9, 10                  | H-2 $\alpha$ , 11 $\alpha$ , 20 |
| 22a         | 5.15 (brd)                             | 113.2, CH <sub>2</sub>     |                            | 11, 13                       | H-22b                           |
| 22b         | 5.04 (brd)                             |                            |                            | 11, 13                       | H-11 $\beta$ , 22a              |
| 23          | 1.41 (s)                               | 22.7, CH <sub>3</sub>      |                            | 12, 13, 14, 17               | H-11 $\alpha$ , 20              |
| 24          | 1.51 (d, 6.5)                          | 14.8, CH <sub>3</sub>      | H-16                       | 16, 17                       | H-16                            |

<sup>1</sup>H 800 MHz, <sup>13</sup>C 200 MHz (CDCl<sub>3</sub>)

Supplementary Table 14. NMR data of compound 16.

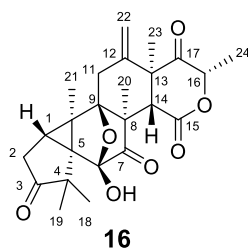

| position    | $\delta_{\text{H}}$ (mult., $J$ in Hz) | $\delta_{\text{C}}$ , type | COSY        | HMBC                         | NOESY                           |
|-------------|----------------------------------------|----------------------------|-------------|------------------------------|---------------------------------|
| 1           | 2.33 (d, 6.7)                          | 16.7, CH                   | H-2 $\beta$ | 2, 3, 5, 6, 9                | H-2 $\beta$ , 11 $\beta$        |
| 2 $\alpha$  | 2.19 (d, 19.2)                         | 35.2, CH <sub>2</sub>      |             | 1, 3, 4, 5, 10               | H-21                            |
| 2 $\beta$   | 2.83 (dd, 19.2, 6.7)                   |                            | H-1         | 1, 3, 10                     |                                 |
| 3           |                                        | 218.0, C                   |             |                              |                                 |
| 4           |                                        | 46.1, C                    |             |                              |                                 |
| 5           |                                        | 38.7, C                    |             |                              |                                 |
| 6           |                                        | 104.2, C                   |             |                              |                                 |
| 7           |                                        | 208.8, C                   |             |                              |                                 |
| 8           |                                        | 52.4, C                    |             |                              |                                 |
| 9           |                                        | 83.1, C                    |             |                              |                                 |
| 10          |                                        | 33.4, C                    |             |                              |                                 |
| 11 $\alpha$ | 2.93 (dt, 15.4, 1.3)                   | 32.0, CH <sub>2</sub>      |             | 9, 10, 12, 13, 22            | H-21, 23                        |
| 11 $\beta$  | 2.45 (d, 15.4)                         |                            |             | 8, 9, 10, 12, 13, 22         | H-22a                           |
| 12          |                                        | 139.5, C                   |             |                              |                                 |
| 13          |                                        | 50.8, C                    |             |                              |                                 |
| 14          | 3.61 (s)                               | 47.5, CH                   |             | 7, 8, 12, 13, 15, 17, 20, 23 | H-16                            |
| 15          |                                        | 167.8, C                   |             |                              |                                 |
| 16          | 4.94 (q, 6.3)                          | 77.0, CH                   | H-24        | 24                           | H-14                            |
| 17          |                                        | 205.0, C                   |             |                              |                                 |
| 18          | 1.27 (s)                               | 24.6, CH <sub>3</sub>      |             | 3, 4, 5, 19                  | H-2 $\beta$                     |
| 19          | 1.02 (s)                               | 20.0, CH <sub>3</sub>      |             | 3, 4, 5, 18                  | H-20, 21                        |
| 20          | 1.78 (s)                               | 15.6, CH <sub>3</sub>      |             | 7, 8, 9, 14                  | H-19, 21, 24                    |
| 21          | 1.14 (s)                               | 8.9, CH <sub>3</sub>       |             | 1, 5, 9, 10                  | H-2 $\alpha$ , 11 $\alpha$ , 20 |
| 22a         | 5.06 (d, 1.3)                          | 114.7, CH <sub>2</sub>     |             | 11, 13                       | H-11 $\beta$                    |
| 22b         | 4.90 (d, 1.3)                          |                            |             | 11, 12, 13                   | H-24                            |
| 23          | 1.45 (s)                               | 21.2, CH <sub>3</sub>      |             | 12, 13, 14, 17               | H-11 $\alpha$ , 20              |
| 24          | 1.47 (d, 6.3)                          | 14.4, CH <sub>3</sub>      | H-16        |                              | H-16, 22b                       |
| OH          | 4.16 (s)                               |                            |             | 5                            |                                 |

<sup>1</sup>H 900 MHz, <sup>13</sup>C 225 MHz (CDCl<sub>3</sub>)



Supplementary Table 15. NMR data of compound 22.

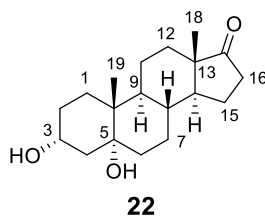

| position    | $\delta_{\text{H}}$ (mult., $J$ in Hz) | $\delta_{\text{C}}$ , type | COSY                                 | HMBC                        | NOESY                                          |
|-------------|----------------------------------------|----------------------------|--------------------------------------|-----------------------------|------------------------------------------------|
| 1 $\alpha$  | 1.71 (m)                               | 27.8, CH <sub>2</sub>      | H-2 $\beta$                          | 2, 3, 10, 19                | H-9                                            |
| 1 $\beta$   | 1.29 (m)                               |                            | H-2 $\alpha$ , 2 $\beta$             | 2, 3, 5, 10, 19             | H-2 $\beta$ , 19                               |
| 2 $\alpha$  | 1.73 (m)                               | 29.6, CH <sub>2</sub>      | H-1 $\beta$ , 3                      | 3, 4, 10                    | H-3                                            |
| 2 $\beta$   | 1.83 (m)                               |                            | H-1 $\alpha$ , 1 $\beta$ , 3         | 1, 10                       | H-1 $\beta$                                    |
| 3           | 4.06 (m)                               | 68.6, CH                   | H-2 $\alpha$ , 2 $\beta$ , 4 $\beta$ | 1, 5                        | H-2 $\beta$ , 4 $\beta$                        |
| 4 $\alpha$  | 1.84 (dd, 9.6, 3.1)                    | 39.9, CH <sub>2</sub>      | H-3                                  | 5, 10                       | H-2 $\alpha$ , 6 $\alpha$                      |
| 4 $\beta$   | 1.56 (m)                               |                            | H-3                                  | 2, 3, 5, 6, 10              | H-3, 11 $\beta$ , 12 $\beta$                   |
| 5           |                                        | 76.1, C                    |                                      |                             |                                                |
| 6 $\alpha$  | 1.64 (m)                               | 34.6, CH <sub>2</sub>      | H-7 $\alpha$ , 7 $\beta$             | 4, 7, 8                     | H-4 $\alpha$ , 7 $\alpha$                      |
| 6 $\beta$   | 1.34 (m)                               |                            | H-7 $\beta$                          | 5, 8, 10                    | H-4 $\beta$ , 7 $\beta$                        |
| 7 $\alpha$  | 1.53 (m)                               | 25.5, CH <sub>2</sub>      | H-6 $\alpha$ , 8                     | 9                           | H-6 $\alpha$                                   |
| 7 $\beta$   | 1.44 (m)                               |                            | H-6 $\alpha$ , 6 $\beta$ , 8         | 6, 8, 9, 14                 | H-6 $\beta$ , 15 $\beta$                       |
| 8           | 1.67 (m)                               | 35.7, CH                   | H-7 $\alpha$ , 7 $\beta$ , 9, 14     | 7, 9, 14                    | H-18, 19                                       |
| 9           | 1.60 (m)                               | 47.0, CH                   | H-8, 11 $\alpha$ , 11 $\beta$        | 8, 10, 11, 19               | H-1 $\alpha$ , 14                              |
| 10          |                                        | 41.0, C                    |                                      |                             |                                                |
| 11 $\alpha$ | 1.58 (m)                               | 21.3, CH <sub>2</sub>      | H-9, 12 $\alpha$ , 12 $\beta$        | 10, 12                      |                                                |
| 11 $\beta$  | 1.33 (m)                               |                            | H-9, 12 $\alpha$ , 12 $\beta$        | 10, 12                      | H-12 $\beta$ , 18, 19                          |
| 12 $\alpha$ | 1.26 (ddd, 14.1, 12.8, 3.9)            | 33.0, CH <sub>2</sub>      | H-11 $\alpha$ , 11 $\beta$           | 11, 13, 17, 18              | H-11 $\alpha$ , 14                             |
| 12 $\beta$  | 1.77 (ddd, 12.8, 3.9, 2.6)             |                            | H-11 $\alpha$ , 11 $\beta$           | 9, 11, 13, 14               | H-12 $\beta$ , 11 $\beta$ , 18                 |
| 13          |                                        | 49.2, C                    |                                      |                             |                                                |
| 14          | 1.39 (m)                               | 52.6, CH                   | H-8, 15 $\alpha$                     | 7, 8, 9, 11, 12, 13, 15, 18 | H-9, 12 $\alpha$ , 15 $\alpha$                 |
| 15 $\alpha$ | 1.95 (m)                               | 22.6, CH <sub>2</sub>      | H-14, 16 $\alpha$                    | 13, 14, 17                  | H-14                                           |
| 15 $\beta$  | 1.55 (m)                               |                            | H-16 $\beta$                         | 14                          | H-16 $\beta$ , 18                              |
| 16 $\alpha$ | 2.07 (ddd, 19.4, 9.6, 8.9)             | 36.7, CH <sub>2</sub>      | H-15 $\alpha$ , 15 $\beta$           | 15, 17                      |                                                |
| 16 $\beta$  | 2.43 (dd, 19.4, 8.9)                   |                            | H-15 $\beta$                         | 14, 15, 17                  | H-15 $\beta$                                   |
| 17          |                                        | 224.1, C                   |                                      |                             |                                                |
| 18          | 0.88 (s)                               | 14.3, CH <sub>3</sub>      |                                      | 12, 13, 14, 17              | H-8, 11 $\beta$ , 12 $\beta$ , 15 $\beta$ , 19 |
| 19          | 1.01 (s)                               | 16.2, CH <sub>3</sub>      |                                      | 1, 5, 9, 10                 | H-1 $\beta$ , 8, 11 $\beta$ , 18               |

<sup>1</sup>H 800 MHz, <sup>13</sup>C 200 MHz (CD<sub>3</sub>OD)

Supplementary Table 16. NMR data of compound **23**.

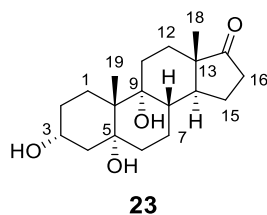

| position    | $\delta_{\text{H}}$ (mult., $J$ in Hz) | $\delta_{\text{C}}$ , type | COSY                                              | HMBC           | NOESY                               |
|-------------|----------------------------------------|----------------------------|---------------------------------------------------|----------------|-------------------------------------|
| 1 $\alpha$  | 1.27 (m)                               | 22.8, CH <sub>2</sub>      | H-2 $\alpha$ , 2 $\beta$                          |                | H-11 $\alpha$                       |
| 1 $\beta$   | 2.31 (ddd, 14.5, 13.6, 4.6)            |                            | H-2 $\alpha$ , 2 $\beta$                          | 2              | H-2 $\beta$ , 15 $\beta$            |
| 2 $\alpha$  | 1.87 (m)                               | 29.7, CH <sub>2</sub>      | H-1 $\alpha$ , 1 $\beta$ , 3                      | 1              |                                     |
| 2 $\beta$   | 1.82 (m)                               |                            | H-1 $\alpha$ , 1 $\beta$ , 3                      | 10             | H-3                                 |
| 3           | 4.04 (m)                               | 68.4, CH                   | H-2 $\alpha$ , 2 $\beta$ , 4 $\alpha$ , 4 $\beta$ | 1, 5           | H-2 $\beta$ , 15 $\beta$            |
| 4 $\alpha$  | 1.51 (m)                               | 40.4, CH <sub>2</sub>      | H-3                                               | 2, 3, 5, 6, 10 | H-6 $\alpha$                        |
| 4 $\beta$   | 1.91 (dd, 14.5, 3.4)                   |                            | H-3                                               | 5              | H-3, 19                             |
| 5           |                                        | 79.4, C                    |                                                   |                |                                     |
| 6 $\alpha$  | 1.41 (m)                               | 35.3, CH <sub>2</sub>      | H-7                                               | 4, 5, 8, 10    |                                     |
| 6 $\beta$   | 1.68 (m)                               |                            | H-7                                               | 5              | H-8, 18, 19                         |
| 7           | 1.65 (m)                               | 27.5, CH <sub>2</sub>      | H-6 $\alpha$ , 6 $\beta$ , 8                      | 5, 8           |                                     |
| 8           | 2.04 (m)                               | 39.0, CH                   | H-7, 14                                           | 14             | H-11 $\beta$ , 15 $\beta$ , 18, 19, |
| 9           |                                        | 79.6, C                    |                                                   |                |                                     |
| 10          |                                        | 43.6, C                    |                                                   |                |                                     |
| 11 $\alpha$ | 1.65 (m)                               | 20.9, CH <sub>2</sub>      | H-12                                              |                | H-1 $\alpha$                        |
| 11 $\beta$  | 1.43 (m)                               |                            | H-12                                              |                | H-8                                 |
| 12          | 1.50 (m)                               | 28.2, CH <sub>2</sub>      | H-11 $\alpha$ , 11 $\beta$                        | 13             |                                     |
| 13          |                                        | 49.0, C                    |                                                   |                |                                     |
| 14          | 2.03 (m)                               | 45.3, CH                   | H-8, 15 $\beta$                                   | 13             | H-15 $\alpha$                       |
| 15 $\alpha$ | 1.57 (m)                               | 22.5, CH <sub>2</sub>      | H-16 $\alpha$ , 16 $\beta$                        | 16             | H-14                                |
| 15 $\beta$  | 1.89 (m)                               |                            | H-14, 16 $\beta$                                  | 14, 17         | H-3, 8, 16 $\beta$                  |
| 16 $\alpha$ | 2.43 (ddd, 19.4, 9.0, 0.5)             | 36.9, CH <sub>2</sub>      | H-15 $\alpha$                                     | 14, 15, 17     | H-15 $\alpha$                       |
| 16 $\beta$  | 2.09 (ddd, 19.4, 9.6, 9.0)             |                            | H-15 $\alpha$ , 15 $\beta$                        | 14, 15, 17     | H-15 $\beta$                        |
| 17          |                                        | 223.8, C                   |                                                   |                |                                     |
| 18          | 0.89 (s)                               | 13.4, CH <sub>3</sub>      |                                                   | 12, 13, 14, 17 | H-6 $\beta$ , 8                     |
| 19          | 1.11 (s)                               | 19.2, CH <sub>3</sub>      |                                                   | 1, 5, 9, 10    | H-4 $\beta$ , 6 $\beta$ , 8         |

<sup>1</sup>H 800 MHz, <sup>13</sup>C 200 MHz (CD<sub>3</sub>OD)

Supplementary Table 17. NMR data of compound 25.

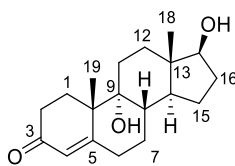

25

| position | $\delta_{\text{H}}$ (mult., $J$ in Hz) | $\delta_{\text{C}}$ , type | COSY     | HMBC           |
|----------|----------------------------------------|----------------------------|----------|----------------|
| 1        | 2.34 (m)                               | 29.7, CH <sub>2</sub>      |          | 2, 3, 10, 19   |
|          | 1.66 (m)                               |                            | H-2      | 2, 3, 5, 19    |
| 2        | 2.41 (m)                               | 35.0, CH <sub>2</sub>      | H-1      | 1, 3, 4, 10    |
|          | 2.24 (m)                               |                            |          | 4, 5           |
| 3        |                                        | 202.5, C                   |          |                |
| 4        | 5.7 (s)                                | 126.5, CH                  |          | 2, 6, 10       |
| 5        |                                        | 174.6, C                   |          |                |
| 6        | 2.48 (m)                               | 33.3, CH <sub>2</sub>      |          | 4, 5           |
|          | 2.22 (m)                               |                            | H-7      | 5, 8           |
| 7        | 1.48 (m)                               | 24.3, CH <sub>2</sub>      | H-6, 8   | 5              |
|          | 1.25 (m)                               |                            |          | 8, 14          |
| 8        | 1.92 (m)                               | 39.1, CH                   | H-7, 14  | 7, 10, 14, 15  |
| 9        |                                        | 78.0, C                    |          |                |
| 10       |                                        | 46.1, C                    |          |                |
| 11       | 1.73 (m)                               | 27.6, CH <sub>2</sub>      | H-12     | 10, 12, 13     |
|          | 1.46 (m)                               |                            | H-12     | 8, 9, 12       |
| 12       | 1.58 (m)                               | 33.3, CH <sub>2</sub>      | H-11     | 9, 11, 13, 14  |
|          | 1.33 (m)                               |                            | H-11     | 10, 13, 18     |
| 13       |                                        | 44.0, C                    |          |                |
| 14       | 1.47 (m)                               | 45.2, CH                   | H-8, 15  | 7, 18          |
| 15       | 1.49 (m)                               | 26.0, CH <sub>2</sub>      | H-14, 16 | 13             |
|          | 1.44 (m)                               |                            | H-14, 16 | 8              |
| 16       | 1.93 (m)                               | 30.8, CH <sub>2</sub>      | H-15, 17 | 13, 14, 15, 17 |
|          | 1.41 (m)                               |                            | H-15, 17 | 17, 19         |
| 17       | 3.55 (m)                               | 82.3, CH                   | H-16     | 13, 16, 18     |
| 18       | 0.72 (s)                               | 10.9, CH <sub>3</sub>      |          | 14, 17         |
| 19       | 1.28 (s)                               | 20.5, CH <sub>3</sub>      |          | 1, 5, 9, 10    |

<sup>1</sup>H 500 MHz, <sup>13</sup>C 125 MHz (CD<sub>3</sub>OD)

Supplementary Table 18. NMR data of compound 26/27.

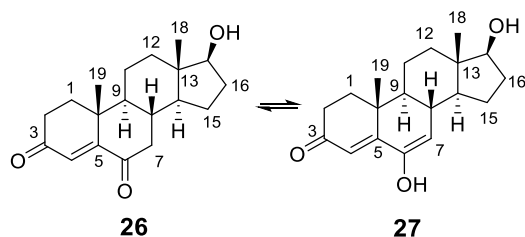

| position    | $\delta_{\text{H}}$ (mult., $J$ in Hz) | $\delta_{\text{H}}$   | $\delta_{\text{C}}$ , type          | $\delta_{\text{C}}$                 | COSY                          | HMBC            | NOESY                             |
|-------------|----------------------------------------|-----------------------|-------------------------------------|-------------------------------------|-------------------------------|-----------------|-----------------------------------|
| 1 $\alpha$  | 1.94 <sup>a</sup> (m)                  | 1.73 <sup>b</sup> (m) | 36.7 <sup>a</sup> , CH <sub>2</sub> | 35.5 <sup>b</sup> , CH <sub>2</sub> | H-2 $\alpha$ , 2 $\beta$      | 2, 9, 10, 19    | H-2 $\alpha$ , 7 $\alpha$         |
| 1 $\beta$   | 2.20 <sup>a</sup> (m)                  | 2.06 <sup>b</sup> (m) |                                     |                                     | H-2 $\alpha$ , 2 $\beta$      | 2, 3, 5, 10, 19 | H-11 $\beta$ , 19                 |
| 2 $\alpha$  | 2.62 <sup>a</sup> (m)                  | 2.62 <sup>b</sup> (m) | 34.9 <sup>a</sup> , CH <sub>2</sub> | 34.7 <sup>b</sup> , CH <sub>2</sub> | H-1 $\alpha$ , 1 $\beta$      | 1, 3            | H-1 $\alpha$ , 14, 12 $\alpha$    |
| 2 $\beta$   | 2.40 <sup>a</sup> (m)                  | 2.40 <sup>b</sup> (m) |                                     |                                     | H-1 $\alpha$ , 1 $\beta$      | 3, 10           | H-1 $\beta$                       |
| 3           |                                        |                       | 202.0 <sup>a</sup> , C              | 202.9 <sup>b</sup> , C              |                               |                 |                                   |
| 4           | 6.06 <sup>a</sup> (s)                  | 6.16 <sup>b</sup> (s) | 126.1 <sup>a</sup> , CH             | 119.7 <sup>b</sup> , CH             |                               | 2, 5, 6, 10     |                                   |
| 5           |                                        |                       | 163.6 <sup>a</sup> , C              | 163.4 <sup>b</sup> , C              |                               |                 |                                   |
| 6           |                                        |                       | 203.9 <sup>a</sup> , C              | 148.4 <sup>b</sup> , C              |                               |                 |                                   |
| 7 $\alpha$  | 2.61 <sup>a</sup> (m)                  | 5.32 <sup>b</sup> (s) | 47.2 <sup>a</sup> , CH <sub>2</sub> | 113.6 <sup>b</sup> , CH             | H-8                           | 8, 9            | H-1 $\alpha$ , 14                 |
| 7 $\beta$   | 2.13 <sup>a</sup> (dd, 12.8, 16.1)     |                       |                                     |                                     | H-8                           | 6, 8, 14        |                                   |
| 8           | 1.99 <sup>a</sup> (m)                  | 2.29 <sup>b</sup> (m) | 35.6 <sup>a</sup> , CH              | 37.1 <sup>b</sup> , CH              | H-7 $\alpha$ , 7 $\beta$      |                 | H-18, 19                          |
| 9           | 1.47 <sup>a</sup> (m)                  | 1.16 <sup>b</sup> (m) | 52.3 <sup>a</sup> , CH              | 53.2 <sup>b</sup> , CH              | H-8, 11 $\alpha$ , 11 $\beta$ | 11              |                                   |
| 10          |                                        |                       | 41.2 <sup>a</sup> , C               | 37.9 <sup>b</sup> , C               |                               |                 |                                   |
| 11 $\alpha$ | 1.55 <sup>a</sup> (m)                  | 1.46 <sup>b</sup> (m) | 21.8 <sup>a</sup> , CH <sub>2</sub> | 21.5 <sup>b</sup> , CH <sub>2</sub> | H-9, 12 $\alpha$ , 12 $\beta$ | 9, 12           | H-12 $\alpha$                     |
| 11 $\beta$  | 1.74 <sup>a</sup> (m)                  | 1.61 <sup>b</sup> (m) |                                     |                                     | H-9, 12 $\alpha$ , 12 $\beta$ |                 | H-1 $\beta$ , 19                  |
| 12 $\alpha$ | 1.20 <sup>a</sup> (m)                  | 1.89 <sup>b</sup> (m) | 37.5 <sup>a</sup> , CH <sub>2</sub> | 37.9 <sup>b</sup> , CH <sub>2</sub> | H-11 $\alpha$ , 11 $\beta$    |                 | H-2 $\alpha$ , 11 $\alpha$        |
| 12 $\beta$  | 1.93 <sup>a</sup> (m)                  | 1.13 <sup>b</sup> (m) |                                     |                                     | H-11 $\alpha$ , 11 $\beta$    |                 | H-18                              |
| 13          |                                        |                       | 44.3 <sup>a</sup> , C               | 45.0 <sup>b</sup> , C               |                               |                 |                                   |
| 14          | 1.21 <sup>a</sup> (m)                  | 1.15 <sup>b</sup> (m) | 52.5 <sup>a</sup> , CH              | 50.6 <sup>b</sup> , CH              | H-15 $\alpha$                 | 9               | H-2 $\alpha$ , 7 $\alpha$         |
| 15 $\alpha$ | 1.64 <sup>a</sup> (m)                  | 1.75 <sup>b</sup> (m) | 24.1 <sup>a</sup> , CH <sub>2</sub> | 24.1 <sup>b</sup> , CH <sub>2</sub> | H-14                          | 13              | H-16 $\alpha$                     |
| 15 $\beta$  | 1.34 <sup>a</sup> (m)                  | 1.43 <sup>b</sup> (m) |                                     |                                     | H-16 $\alpha$                 | 8, 14, 16       | H-18                              |
| 16 $\alpha$ | 2.03 <sup>a</sup> (m)                  | 2.03 <sup>b</sup> (m) | 30.7 <sup>a</sup> , CH <sub>2</sub> | 30.7 <sup>b</sup> , CH <sub>2</sub> | H-15 $\beta$ , 17             | 13, 15, 17      | H-15 $\alpha$ , 17                |
| 16 $\beta$  | 1.52 <sup>a</sup> (m)                  | 1.52 <sup>b</sup> (m) |                                     |                                     | H-17                          |                 | H-15 $\beta$                      |
| 17          | 3.63 <sup>a</sup> (m)                  | 3.63 <sup>b</sup> (m) | 82.2 <sup>a</sup> , CH              | 82.2 <sup>b</sup> , CH              | H-16 $\alpha$ , 16 $\beta$    | 12, 16, 18      | H-11 $\alpha$ , 14, 16 $\alpha$   |
| 18          | 0.80 <sup>a</sup> (s)                  | 0.83 <sup>b</sup> (s) | 11.6 <sup>a</sup> , CH <sub>3</sub> | 11.7 <sup>b</sup> , CH <sub>3</sub> |                               | 12, 13, 14, 17  | H-8, 12 $\beta$ , 15 $\beta$ , 19 |
| 19          | 1.20 <sup>a</sup> (s)                  | 1.16 <sup>b</sup> (s) | 17.8 <sup>a</sup> , CH <sub>3</sub> | 17.0 <sup>b</sup> , CH <sub>3</sub> |                               | 1, 5, 9, 10     | H-1 $\beta$ , 8, 11 $\beta$ , 18  |

note: **26** is interchangeable with **27**. a. assignments for **26**; b. assignments for **27**

<sup>1</sup>H 800 MHz, <sup>13</sup>C 200 MHz (CD<sub>3</sub>OD)

Supplementary Table 19. NMR data of compound 32.

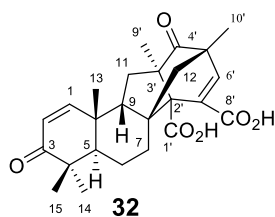

| position    | $\delta_{\text{H}}$ (mult., $J$ in Hz) | $\delta_{\text{C}}$ , type | COSY                        | HMBC                 | NOESY                              |
|-------------|----------------------------------------|----------------------------|-----------------------------|----------------------|------------------------------------|
| 1           | 6.58 (d, 10.1)                         | 158.4, CH                  | H-2                         | 3, 5, 9, 10          | H-2, 9, 11 $\beta$ , 13            |
| 2           | 5.80 (d, 10.1)                         | 125.6, CH                  | H-1                         | 4, 10                | H-1                                |
| 3           |                                        | 207.5, C                   |                             |                      |                                    |
| 4           |                                        | 45.5, C                    |                             |                      |                                    |
| 5           | 2.14 (m)                               | 38.8, CH                   | H-6 $\alpha$ , 6 $\beta$    | 4, 6, 9, 10, 13, 15  | H-11 $\alpha$ , 14                 |
| 6 $\alpha$  | 1.87 (m)                               | 19.2, CH <sub>2</sub>      | H-5, 7 $\alpha$ , 7 $\beta$ |                      |                                    |
| 6 $\beta$   | 1.60 (m)                               |                            | H-5, 7 $\beta$              |                      | H-7 $\beta$ , 13, 15, 10'          |
| 7 $\alpha$  | 2.26 (dd, 10.1, 14.8)                  | 28.9, CH <sub>2</sub>      | H-6 $\alpha$                | 5, 8, 12             |                                    |
| 7 $\beta$   | 1.79 (m)                               |                            | H-6 $\beta$                 | 6, 8, 12, 2'         | H-6 $\beta$ , 12 $\alpha$ , 13     |
| 8           |                                        | 52.4, C                    |                             |                      |                                    |
| 9           | 1.71 (dd, 8.5, 10.9)                   | 59.8, CH                   | H-11 $\alpha$ , 11 $\beta$  | 5, 8, 10, 11, 12, 13 | H-1, 11 $\beta$ , 12 $\alpha$ , 13 |
| 10          |                                        | 40.3, C                    |                             |                      |                                    |
| 11 $\alpha$ | 1.99 (t, 11.9)                         | 37.0, CH <sub>2</sub>      | H-9                         | 9, 10, 3', 4'        | H-5                                |
| 11 $\beta$  | 1.52 (dd, 8.5, 11.9)                   |                            | H-9                         | 8, 2'                | H-1, 9                             |
| 12 $\alpha$ | 1.56 (d, 11.5)                         | 59.5, CH <sub>2</sub>      |                             | 9, 5', 6'            | H-7 $\beta$ , 9, 13, 10'           |
| 12 $\beta$  | 1.54 (d, 11.5)                         |                            |                             | 7, 9, 4', 5'         |                                    |
| 13          | 1.29 (s)                               | 23.1, CH <sub>3</sub>      |                             | 1, 5, 9, 10          | H-6 $\beta$ , 7 $\beta$ , 9, 15    |
| 14          | 1.10 (s)                               | 23.9, CH <sub>3</sub>      |                             | 3, 4, 5, 15          | H-5, 6 $\alpha$                    |
| 15          | 1.02 (s)                               | 21.8, CH <sub>3</sub>      |                             | 3, 4, 5, 14          | H-6 $\beta$ , 13                   |
| 1'          |                                        | ND*                        |                             |                      |                                    |
| 2'          |                                        | 64.2, C                    |                             |                      |                                    |
| 3'          |                                        | 56.6, C                    |                             |                      |                                    |
| 4'          |                                        | 218.8, C                   |                             |                      |                                    |
| 5'          |                                        | 50.1, C                    |                             |                      |                                    |
| 6'          | 6.60 (brs)                             | 140.8, CH                  |                             | 2', 5'               | H-10'                              |
| 7'          |                                        | 136.3, C                   |                             |                      |                                    |
| 8'          |                                        | ND*                        |                             |                      |                                    |
| 9'          | 1.22 (s)                               | 16.8, CH <sub>3</sub>      |                             | 11, 2', 3', 4'       | H-11 $\alpha$                      |
| 10'         | 1.20 (s)                               | 17.9, CH <sub>3</sub>      |                             | 12, 6'               | H-12 $\alpha$ , 6'                 |

\* ND: undetected quaternary carbon.

<sup>1</sup>H 800 MHz, <sup>13</sup>C 200 MHz (CD<sub>3</sub>OD)

Supplementary Table 20. NMR data of compound **33**.

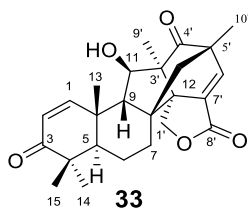

| position    | $\delta_{\text{H}}$ (mult., $J$ in Hz) | $\delta_{\text{C}}$ , type | COSY                        | HMBC                 | NOESY                                  |
|-------------|----------------------------------------|----------------------------|-----------------------------|----------------------|----------------------------------------|
| 1           | 6.89 (d, 10.3)                         | 154.5, CH                  | H-2                         | 3, 5, 9              | H-2, 9, 11, 13, OH                     |
| 2           | 5.96 (d, 10.3)                         | 125.4, CH                  | H-1                         | 4, 10                | H-1                                    |
| 3           |                                        | 203.5, C                   |                             |                      |                                        |
| 4           |                                        | 44.4, C                    |                             |                      |                                        |
| 5           | 1.35 (m)                               | 40.6, CH                   | H-6                         |                      | H-6, 11, 14, 1' $\alpha$ , 1' $\beta$  |
| 6           | 1.81 (m)                               | 18.2, CH <sub>2</sub>      | H-5, 7 $\alpha$ , 7 $\beta$ | 5, 7, 10             | H-7 $\alpha$ , 13, 14, 15, 1' $\beta$  |
| 7 $\alpha$  | 1.65 (m)                               | 27.8, CH <sub>2</sub>      | H-6                         | 8, 2'                | H-6, 12 $\alpha$ , 1' $\beta$          |
| 7 $\beta$   | 1.86 (m)                               |                            | H-6                         | 6, 8, 2'             | H-12 $\alpha$ , 13                     |
| 8           |                                        | 43.9, C                    |                             |                      |                                        |
| 9           | 1.45 (d, 8.5)                          | 66.3, CH                   | H-11                        | 5, 8, 10, 11, 12, 13 | H-1, 12 $\alpha$ , 12 $\beta$ , 13     |
| 10          |                                        | 38.7, C                    |                             |                      |                                        |
| 11          | 3.37 (t, 8.5)                          | 75.8, CH                   | H-9, OH                     | 9, 10, 3', 4', 9'    | H-5, 9, 1' $\alpha$ , 9'               |
| 12 $\alpha$ | 1.50 (d, 12.3)                         | 58.4, CH <sub>2</sub>      |                             | 7, 8, 9, 4', 5', 6'  | H-7 $\beta$ , 9, 10'                   |
| 12 $\beta$  | 1.72 (d, 12.3)                         |                            |                             | 9, 2', 5', 6', 10'   | H-7 $\beta$ , 9, 10'                   |
| 13          | 1.31 (s)                               | 23.0, CH <sub>3</sub>      |                             | 1, 5, 9, 10          | H-1, 6, 7 $\beta$ , 9, 12 $\beta$ , 15 |
| 14          | 1.15 (s)                               | 23.7, CH <sub>3</sub>      |                             | 3, 4, 5, 15          | H-5, 6, 1' $\beta$                     |
| 15          | 1.08 (s)                               | 21.4, CH <sub>3</sub>      |                             | 3, 4, 5, 14          | H-6, 13                                |
| 1' $\alpha$ | 4.37 (d, 10.5)                         | 68.5, CH <sub>2</sub>      |                             | 8, 2', 3', 8'        | H-5, 11, 9'                            |
| 1' $\beta$  | 4.47 (d, 10.5)                         |                            |                             | 8, 2', 3', 8'        | H-5, 6, 7 $\alpha$                     |
| 2'          |                                        | 58.2, C                    |                             |                      |                                        |
| 3'          |                                        | 54.8, C                    |                             |                      |                                        |
| 4'          |                                        | 215.4, C                   |                             |                      |                                        |
| 5'          |                                        | 52.4, C                    |                             |                      |                                        |
| 6'          | 7.18 (s)                               | 143.3, CH                  |                             | 2', 4', 5', 8', 10'  | H-12 $\alpha$ , 10'                    |
| 7'          |                                        | 133.7, C                   |                             |                      |                                        |
| 8'          |                                        | 166.6, C                   |                             |                      |                                        |
| 9'          | 1.07 (s)                               | 15.0, CH <sub>3</sub>      |                             | 11, 2', 3', 4'       | H-11, 1' $\alpha$ , OH,                |
| 10'         | 1.38 (s)                               | 16.8, CH <sub>3</sub>      |                             | 12, 4', 5', 6'       | H-5, 9, 12 $\alpha$ , 6'               |
| OH          | 2.82 (d, 9.0)                          |                            | H-11                        | 11, 3'               | H-1, 9'                                |

<sup>1</sup>H 900 MHz, <sup>13</sup>C 225 MHz (CDCl<sub>3</sub>)

## Supplementary Figures

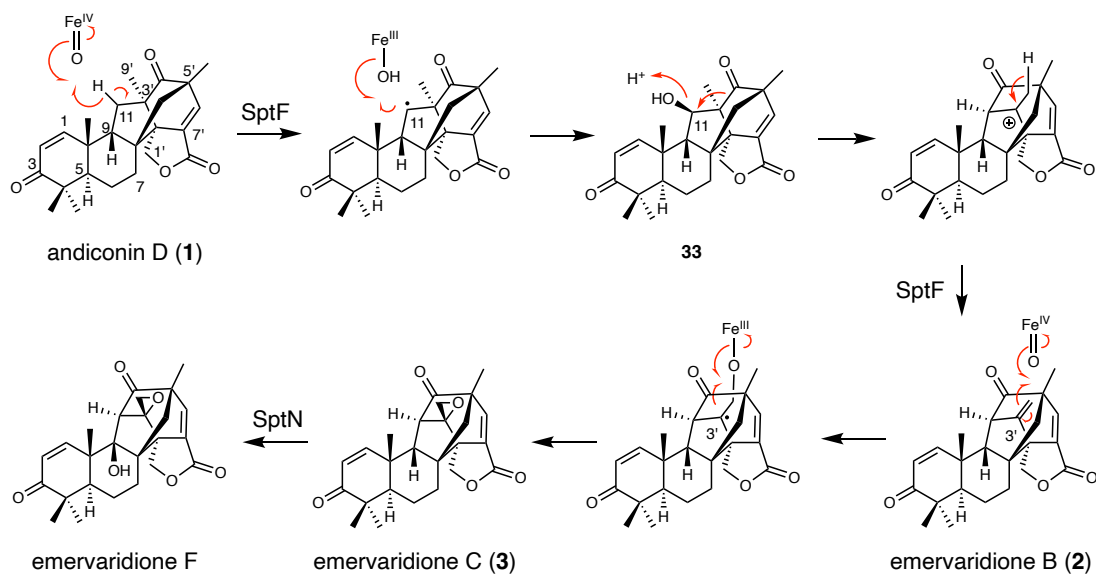

**Supplementary Fig. 1 | Proposed pathway for generation of emervaridone B (3) and emervaridone F from andiconin D (1) in previous studies<sup>1</sup>.** In the proposed pathway, the reaction starts with abstraction of hydrogen at C11 of **1**, and subsequent hydroxyl group rebound at C11 yields **33** as a putative on-pathway intermediate. Then the elimination of hydroxyl group at C11 induces the 1,2-acyl shift. The resultant cationic species undergoes the deprotonation from C-9' to form emervaridone B (**2**), which undergoes epoxidation to form **3**. Another  $\alpha$ KG-dependent dioxygenase SptN catalyzes C-9 hydroxylation on **3** to generate emervaridone F

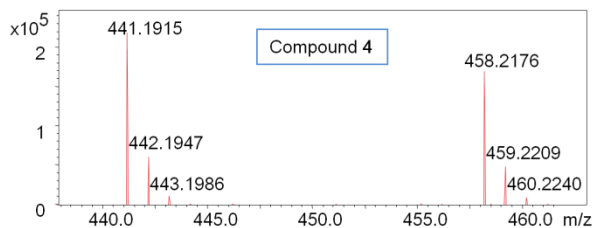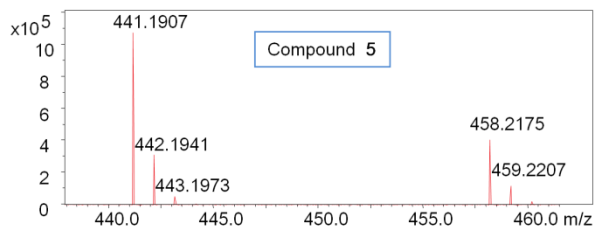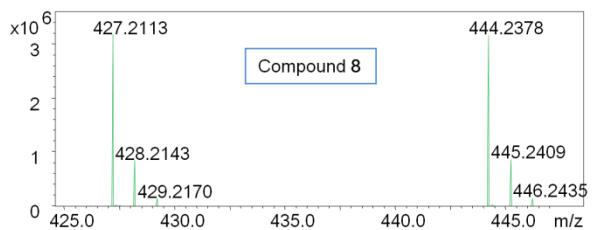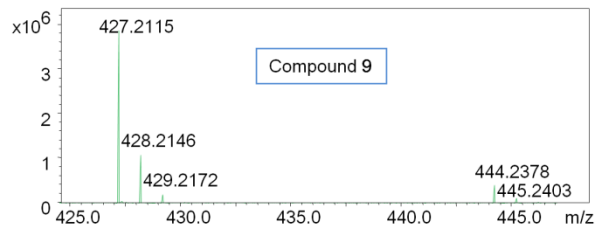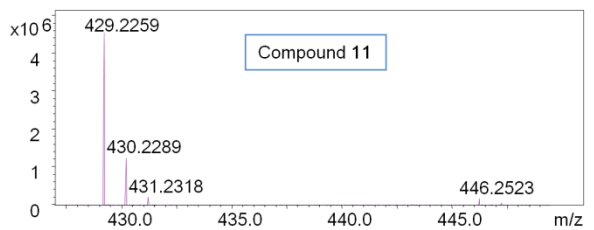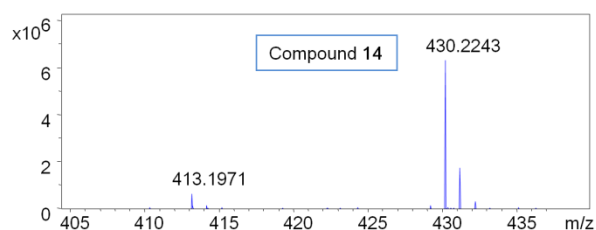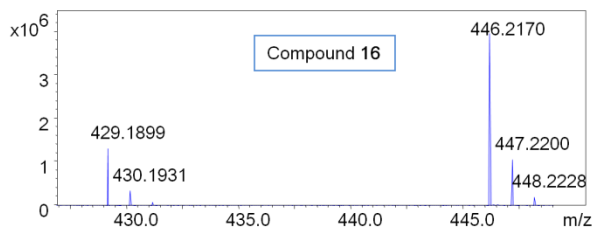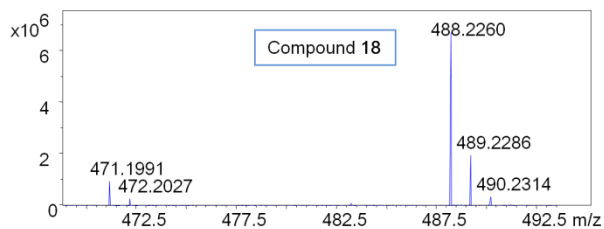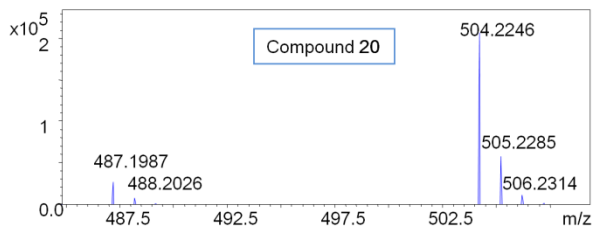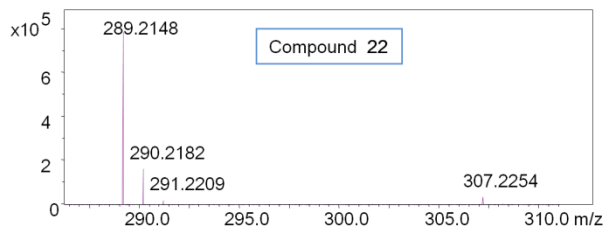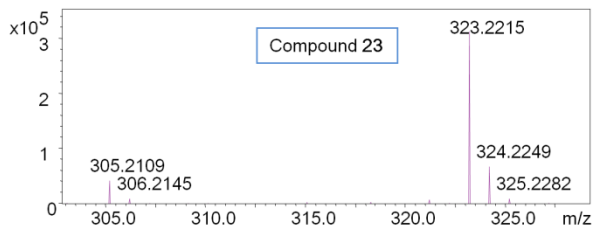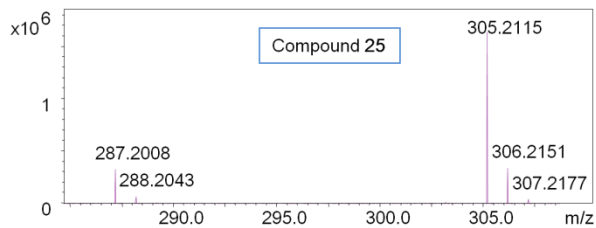



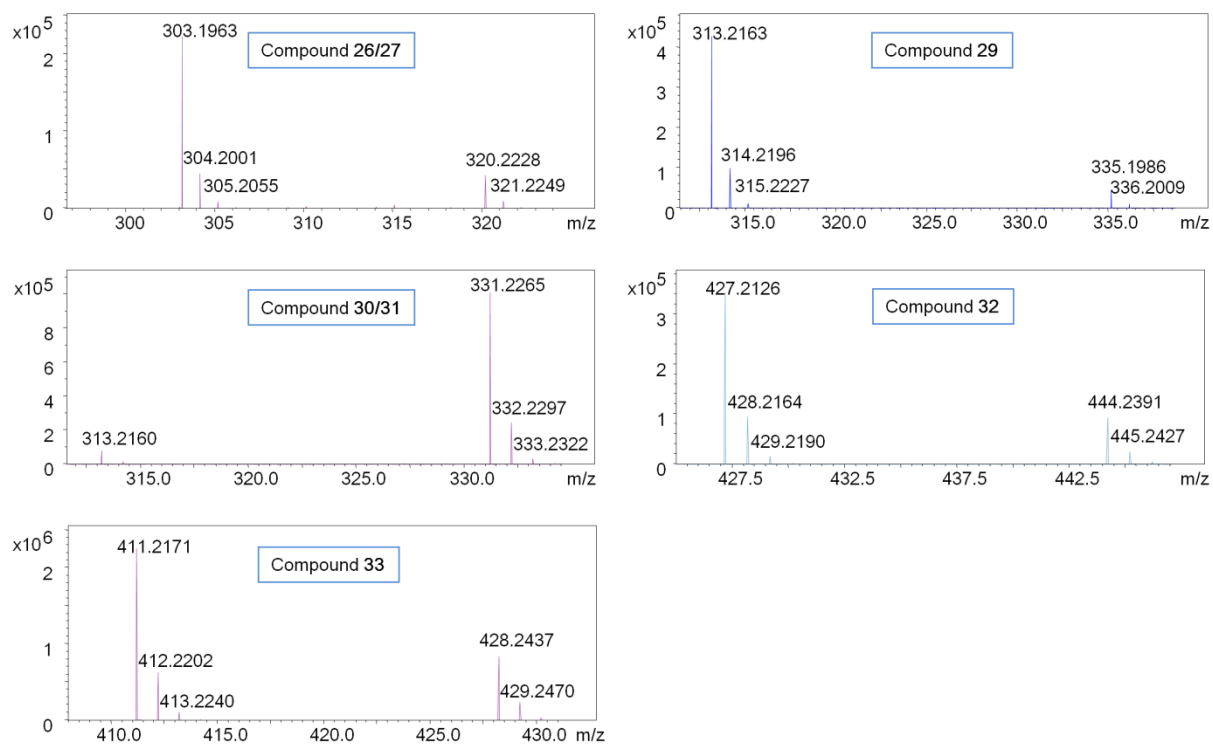

**Supplementary Fig. 2 | HRMS spectrum of key compounds.**

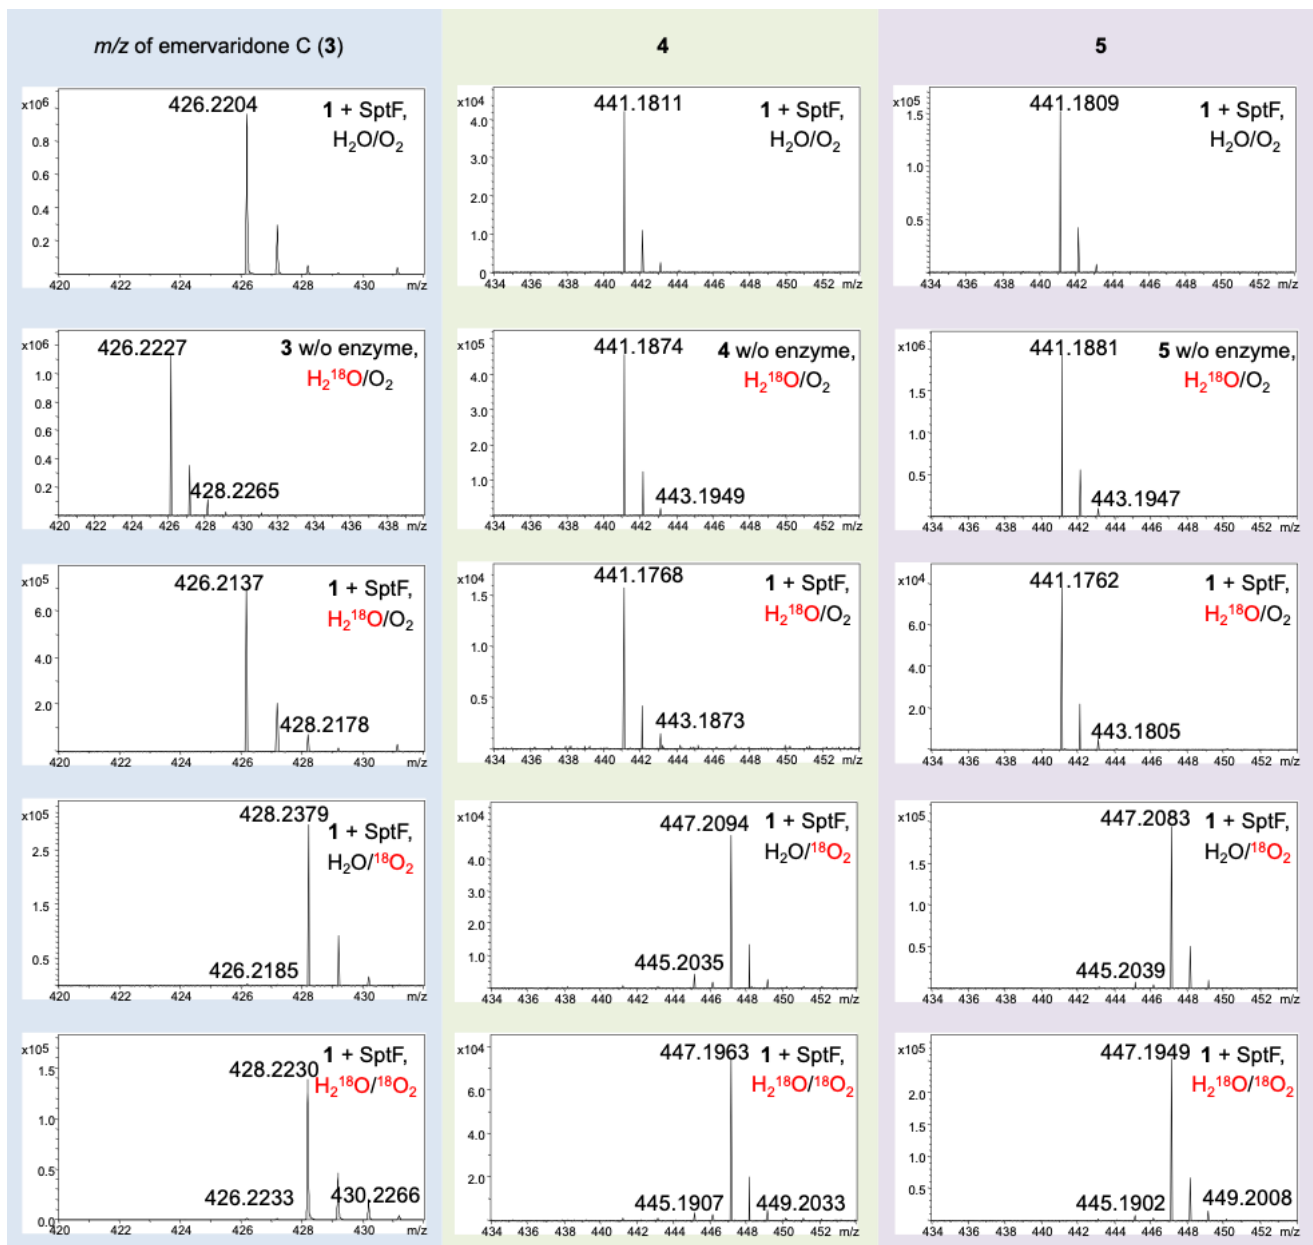

Supplementary Fig. 3 | Results of <sup>18</sup>O-labeling experiment.

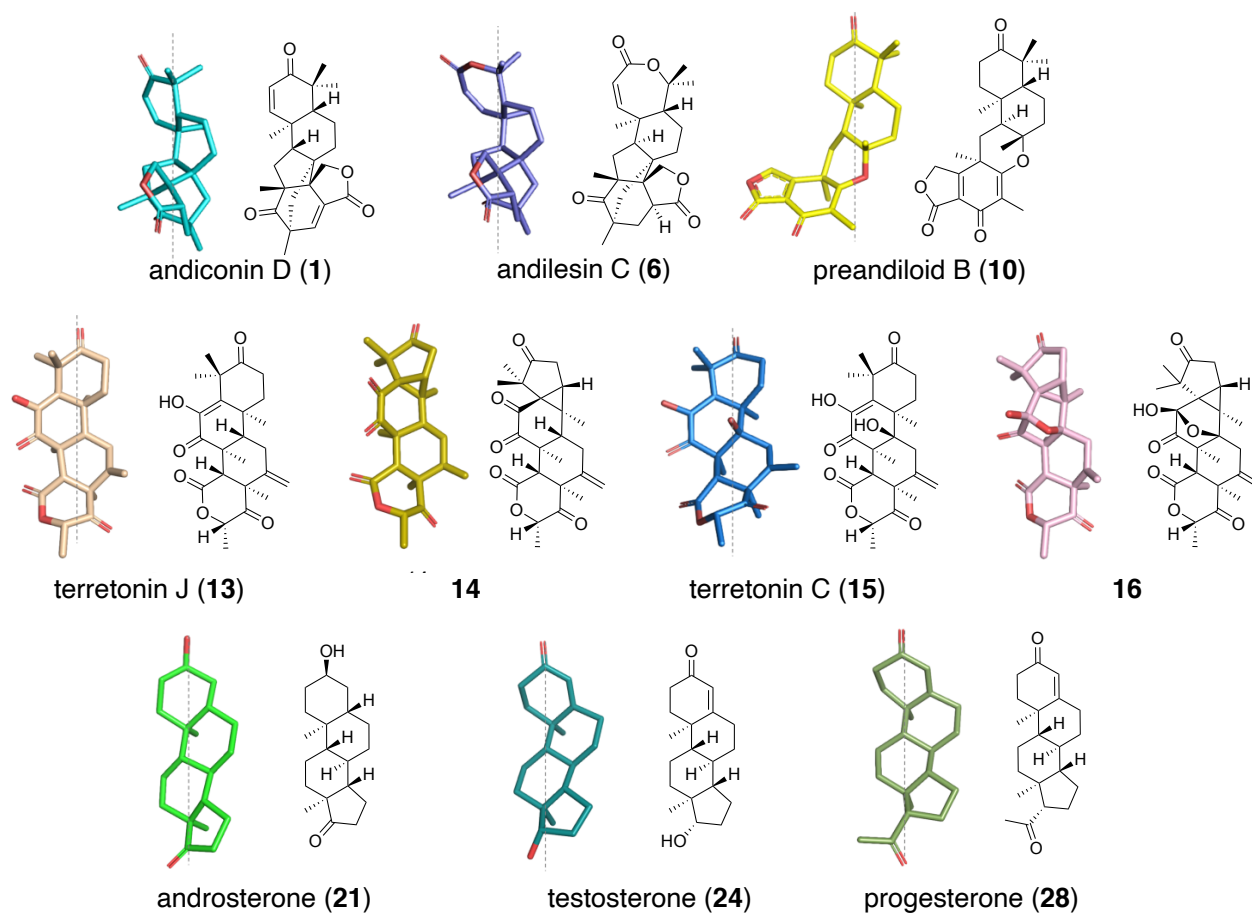

**Supplementary Fig. 4 | Model of compounds.** Substrates contains hydrophobic and hydrophilic parts, which makes good binding via interactions with the hydrophobic and hydrophilic residues in the active site cavity.

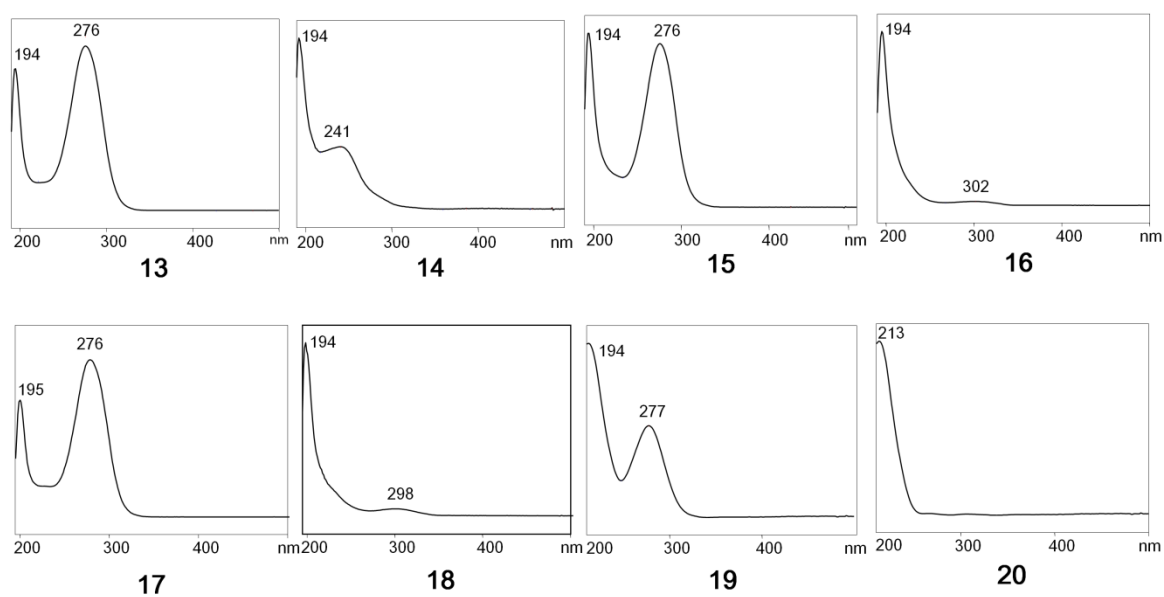

**Supplementary Fig. 5 | UV spectra of 13-20.**

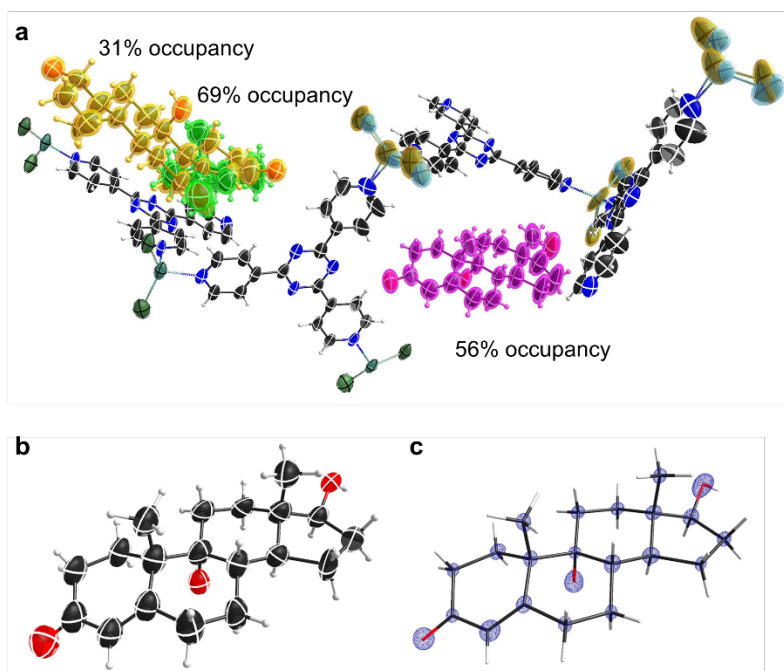

**Supplementary Fig. 6 | Crystal structure of the complex of 25 and the crystalline sponge.** **a**, Structure of an asymmetric unit containing three crystallographically independent molecules of **25**. Solvent molecules have been omitted for clarity. **b**, ORTEP drawing with 50 % probability for **25**. **c**, Crystal structure of **25** superimposed with the Fourier electron density map ( $3.6 \text{ e}\text{\AA}^3$  ( $\sigma = 1.3$ )).

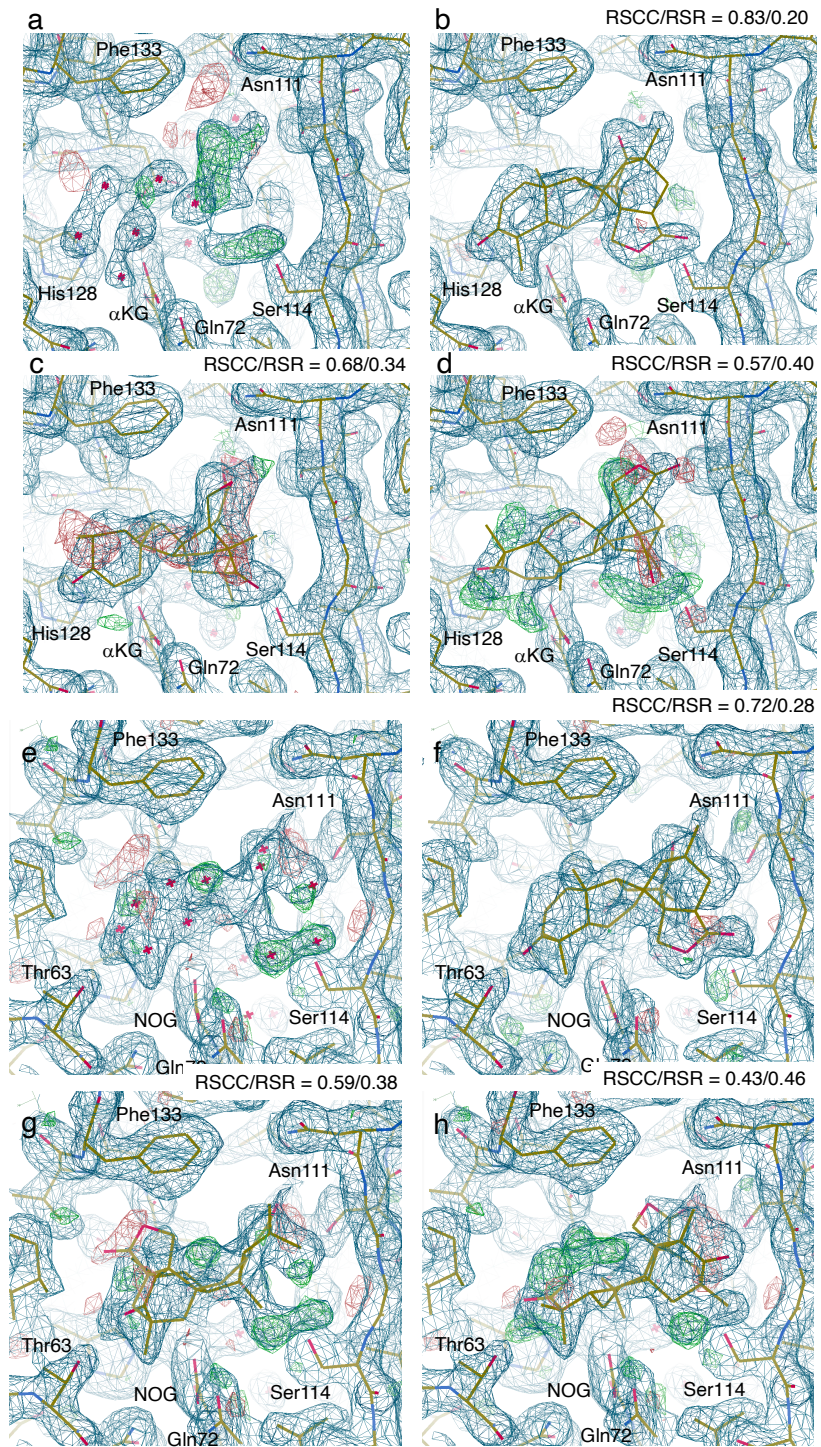



(continued)

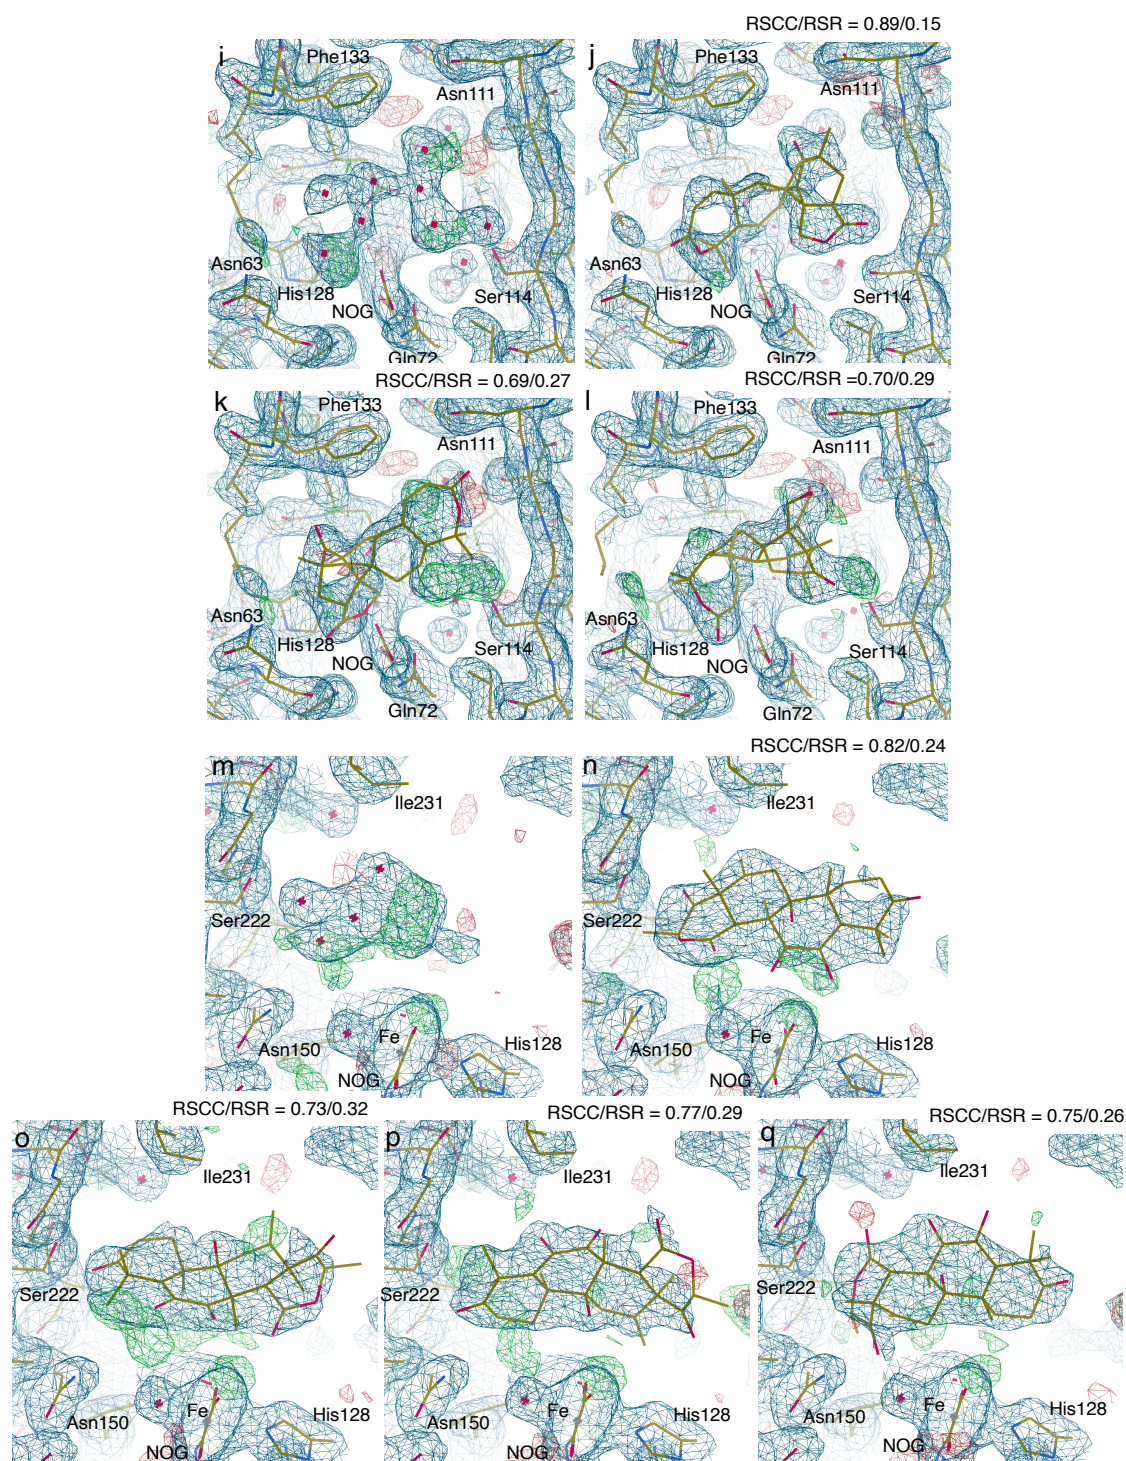

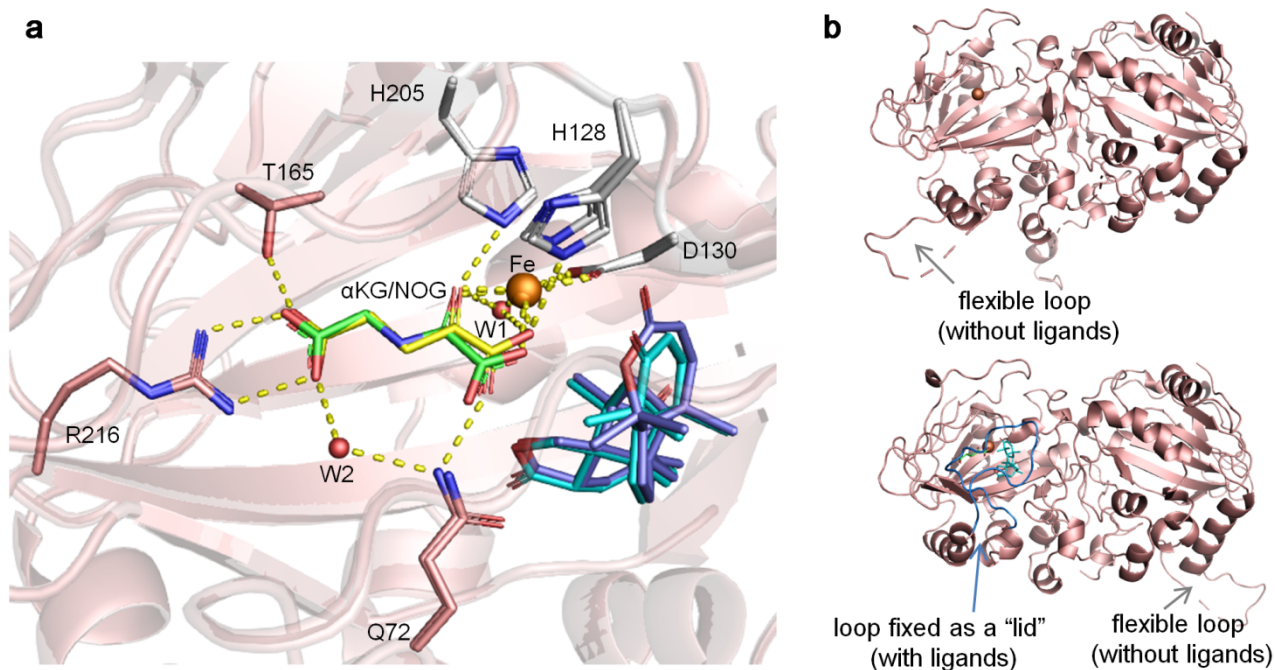

**Supplementary Fig. 8 | The active site of SptF.** **a.** Conserved 2-His-1-Asp facial triad for metal binding (H205, H128, and D130) is shown as grey sticks. And the binding mode of  $\alpha$ KG (in yellow) and NOG (in green) in SptF-Fe/ $\alpha$ KG/**1** and SptF-Fe/NOG/**6** are almost identical, and these ligands interact with the facial triad, Gln72, Thr165, and Arg216 via hydrogen bonding networks. **b.** the density of the loop between Trp53 and Asn75 of SptF (shown in blue) was observed only upon substrate binding, and it serves as an lid to encapsulate the substrate in the active site of SptF. Note that water molecules are shown as red spheres, and Fe is shown as orange spheres. **1** and **6** are shown as cyan and purple sticks, respectively. Hydrogen networks are shown as yellow dash lines.

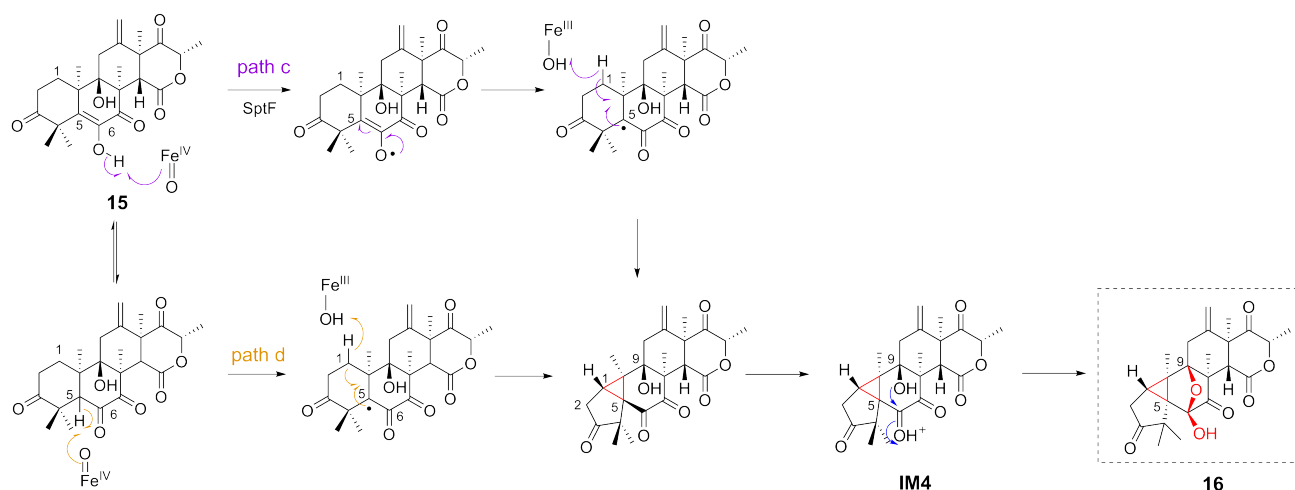

**Supplementary Fig. 9 | Proposed mechanism for generation of 16 from terretinin C (15).** For path c (shown in purple), the enolic hydrogen is abstracted to form a radical, which leads to the formation of a highly congested cyclopropane ring in IM4 via radical recombination. For path d (shown in orange), the reaction starts with abstraction of hydrogen atom at C5 on the tautomer of **15**, and subsequently radical undergoes recombination to form the cyclopropane ring in **IM4**, which is converted to **16** spontaneously via hemiacetal formation reaction.

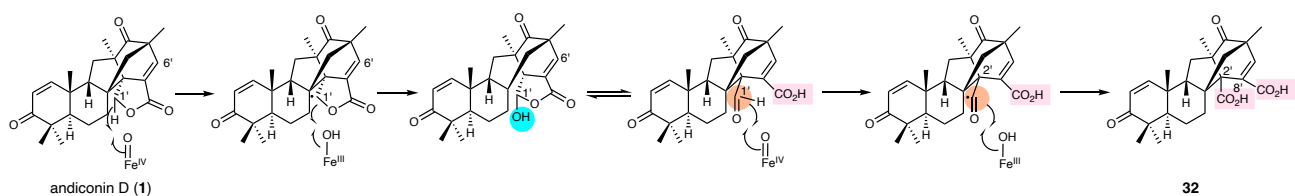

**Supplementary Fig. 10 | Proposed mechanism for generation of 32 from 1 by mutants.** 32 was proposed to be generated via two rounds of hydroxylations at C1' position of **1** by SptF mutants.



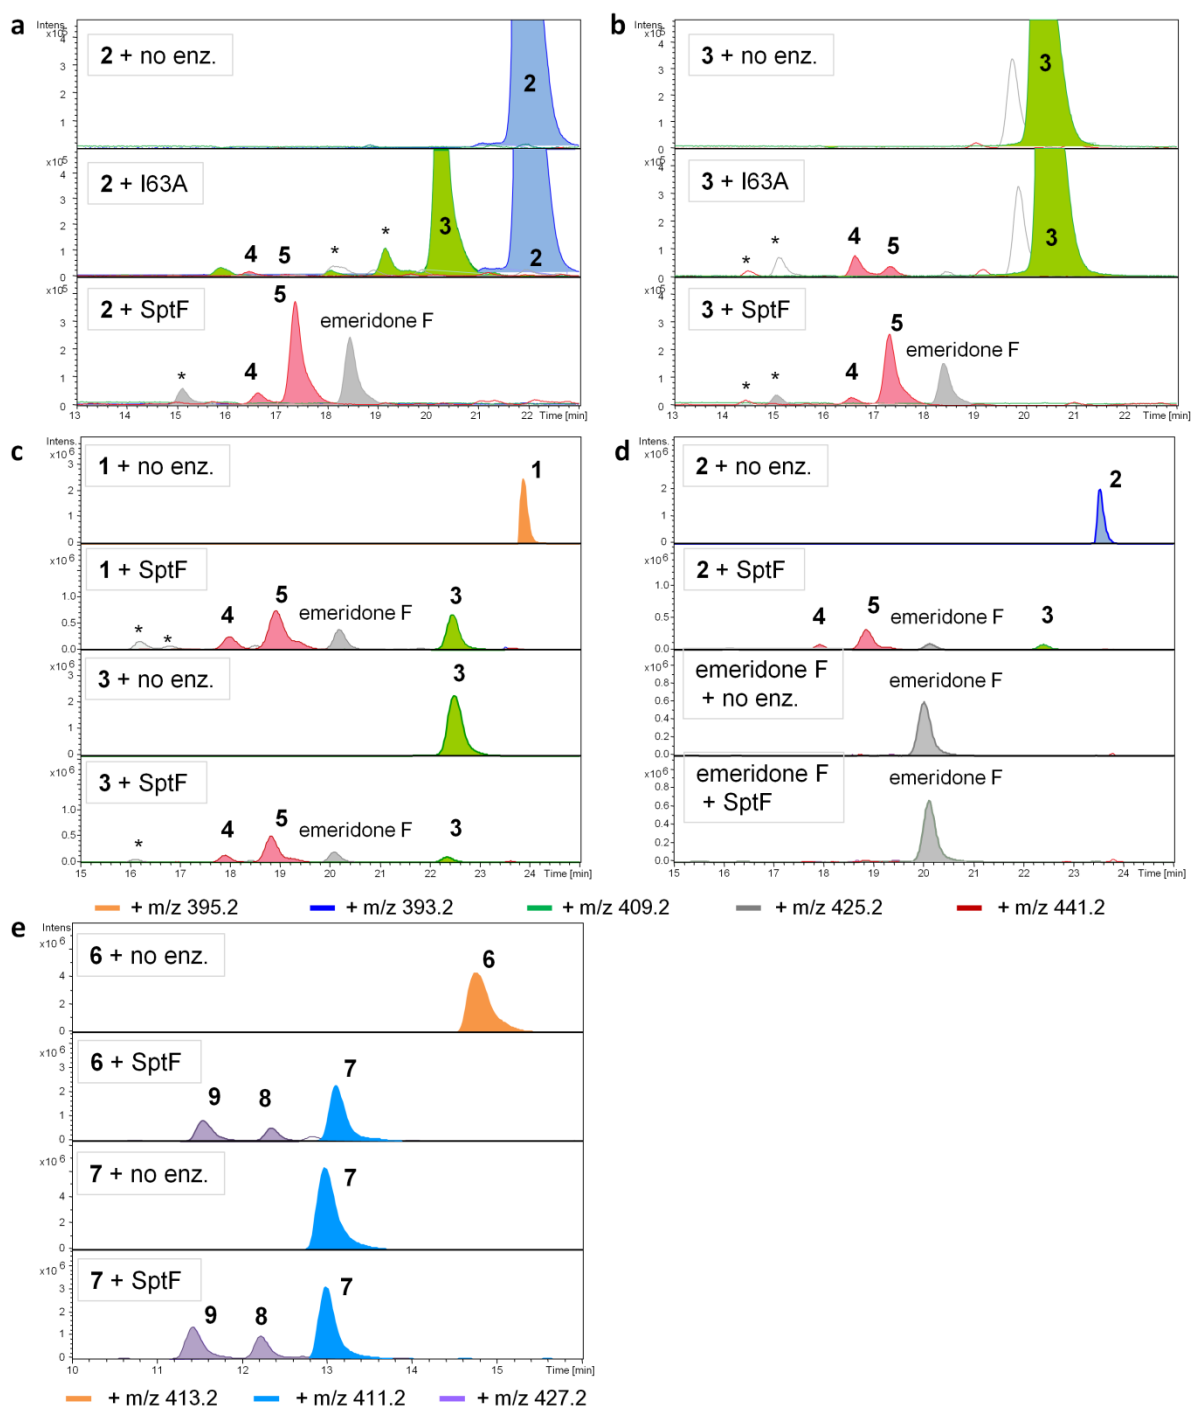

**Supplementary Fig. 11 | In vitro assays with mutants or intermediates.** **a, b**, using **2** or **3** as substrate with I63A mutant or wild-type SptF. **c-e**, using **1-3**, emeridone F, **6** or **7** as substrate with wild-type SptF to determine the reaction order from **1** or **6**. Peaks marked with stars are structure undetermined enzymatic products due to instability or low yields. For I63A mutant, 40  $\mu$ M enzyme was incubated with 100  $\mu$ M substrate at 30  $^{\circ}$ C for 24 hrs. For reactions with possible intermediates, 15  $\mu$ M SptF was used to incubate with 100  $\mu$ M substrate at 30  $^{\circ}$ C for 1 hr. m/z for EIC of each compounds were shown.

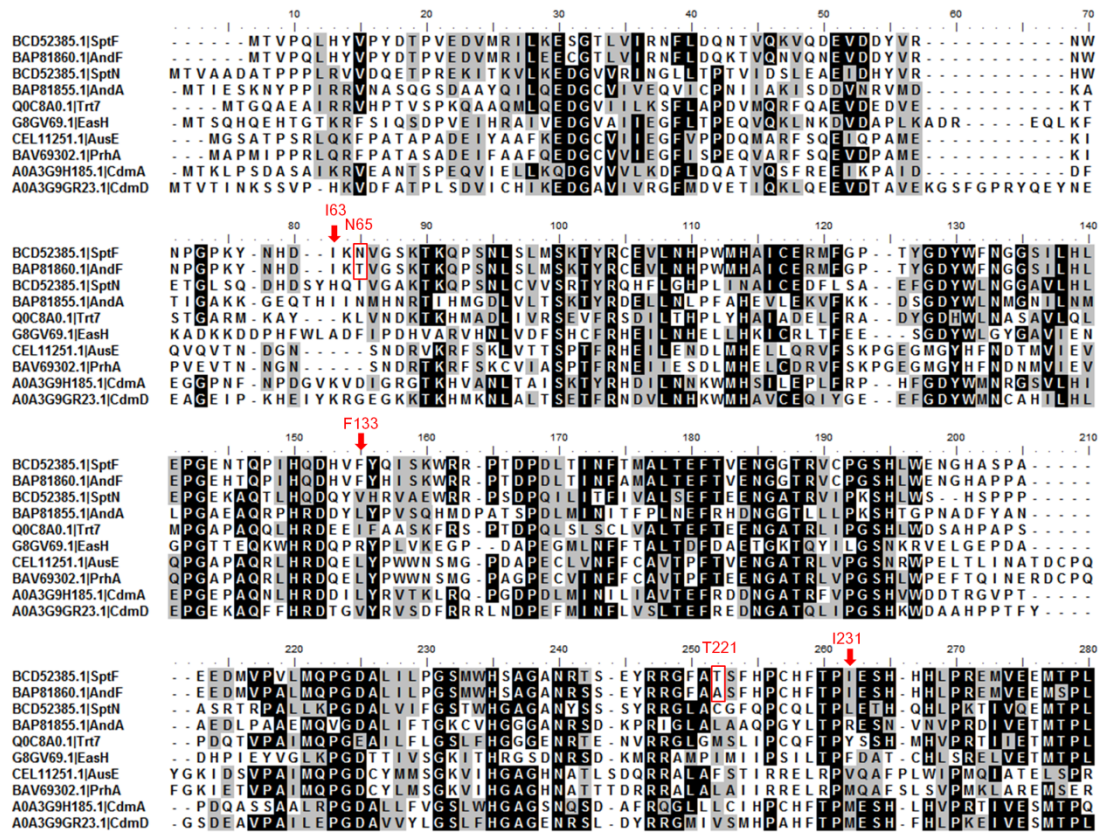

**Supplementary Fig. 12 | The sequence alignment of SptF with other Fe(II)/αKG-dependent oxygenases.** SptF and AndF share 94.4% amino acid sequence identity. Asn65 and Thr221 in SptF is substituted with threonine and alanine in AndF, respectively, as shown in the red boxes. Three hydrophobic residues (I63, F133, and I231) involved in substrate recognition are marked with red arrows. Shading threshold for identity (black) and similarity (gray) is 60% and 30%, respectively.

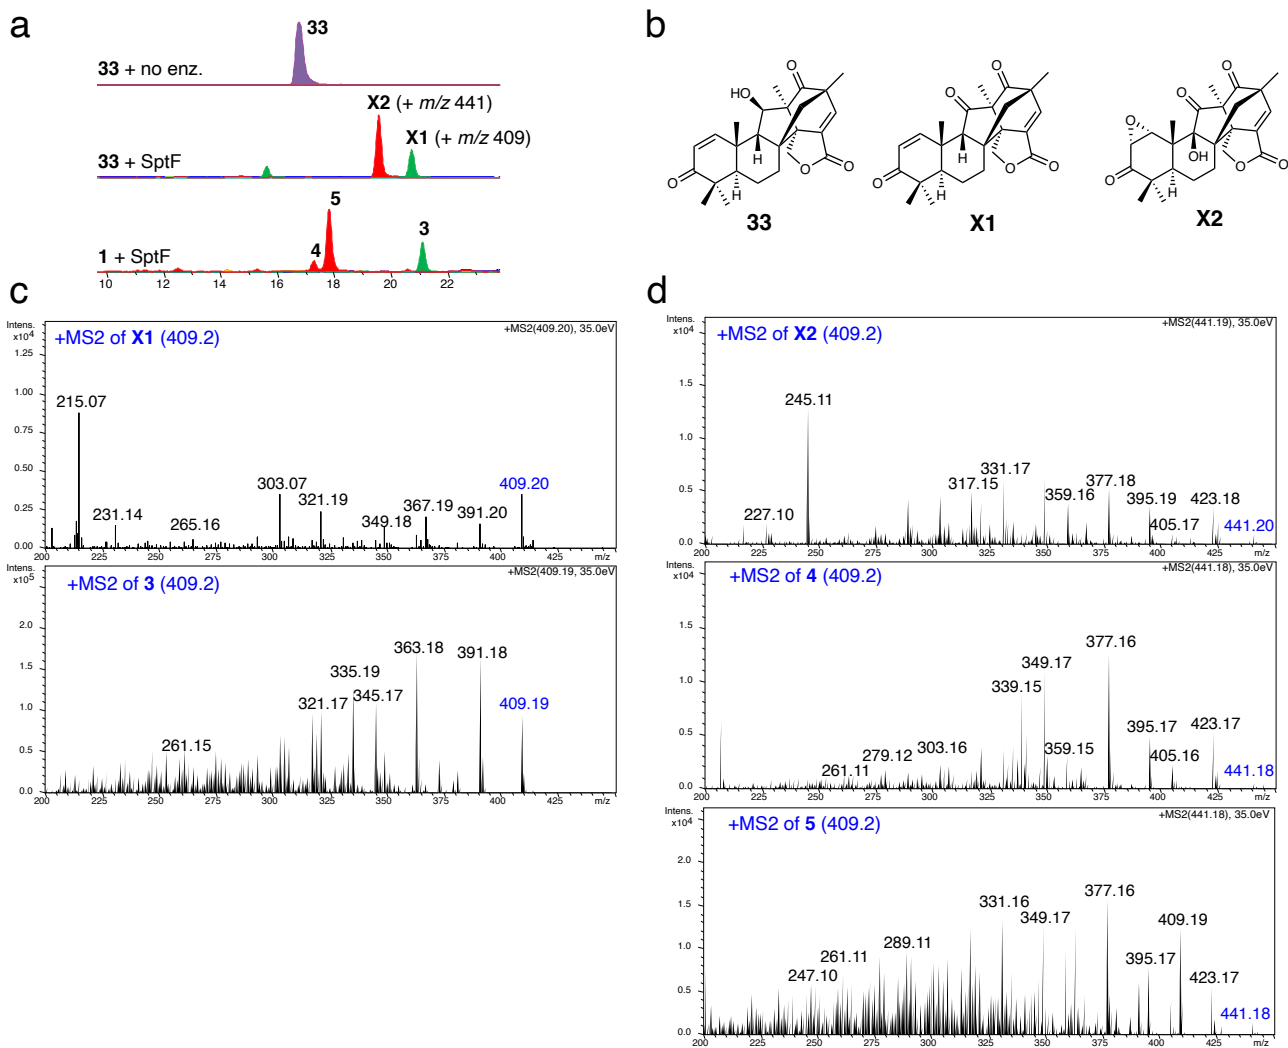

**Supplementary Fig. 13 | *In vitro* assay using SptF and 33.** **a.** LC-MS analysis of enzyme reactions of SptF with **1** and **33**. Structures of **X1** and **X2** could not be determined because of instability and low yield. **b.** Structure of **33**, and postulated structures of **X1** and **X2** based on MS analyses. **c.** Comparison of the MS/MS fragments of **3** and **X1**. **d.** Comparison of the MS/MS fragments of **4**, **5**, and **X1**. Here 15  $\mu$ M SptF was incubated with 100  $\mu$ M **33** at 30 °C for 1 hr.

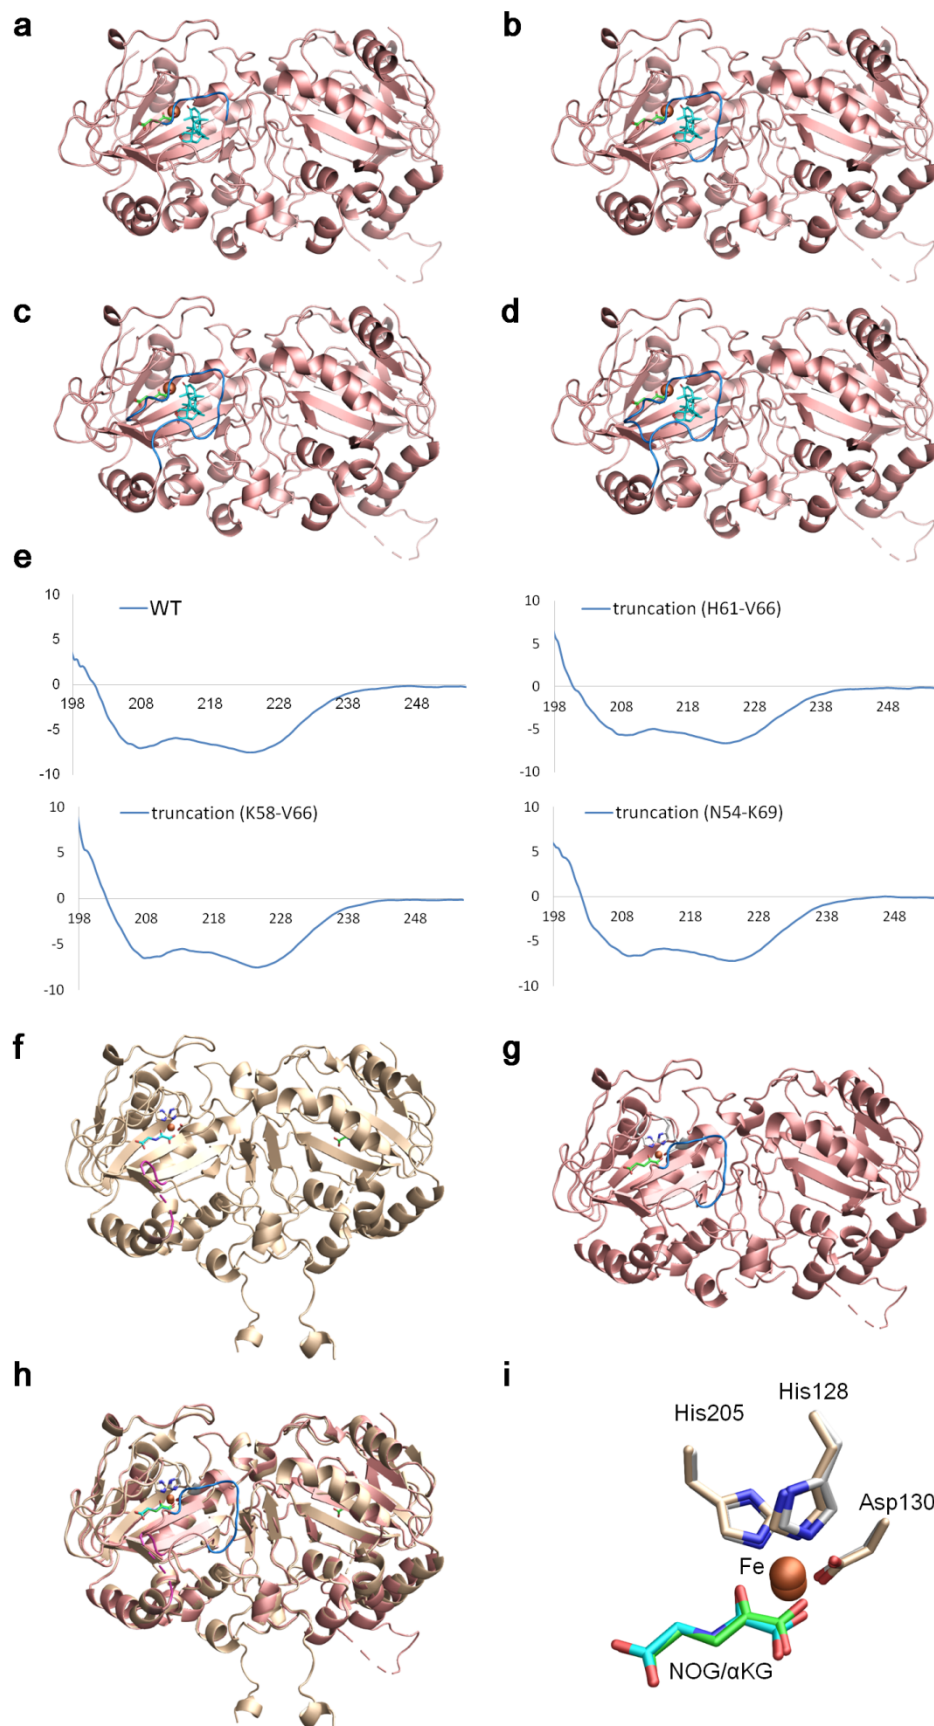

Supplementary Fig. 14 | Loop truncation. **a**, 6 residues (His61-Val66); **b**, 9 residues (Lys58-Val66); **c**, 16

residues (Asn54-Lys69); **d**, 19 residues (Trp53-Lys71) which cover the active site, were truncated from SptF. Truncated regions were shown as blue cartoon. **e**, CD spectra of SptF wild-type and loop truncation variants. **f**, **g**, crystal structures of 9-residue (Lys58-Val66) truncated mutant and wild-type SptF. **h**, **i**, alignment of overall structures and a close view of active sites in 9-residue truncated mutant (wheat) and wild-type SptF (salmon), respectively. NOG and  $\alpha$ KG were shown as cyan and green sticks, respectively.

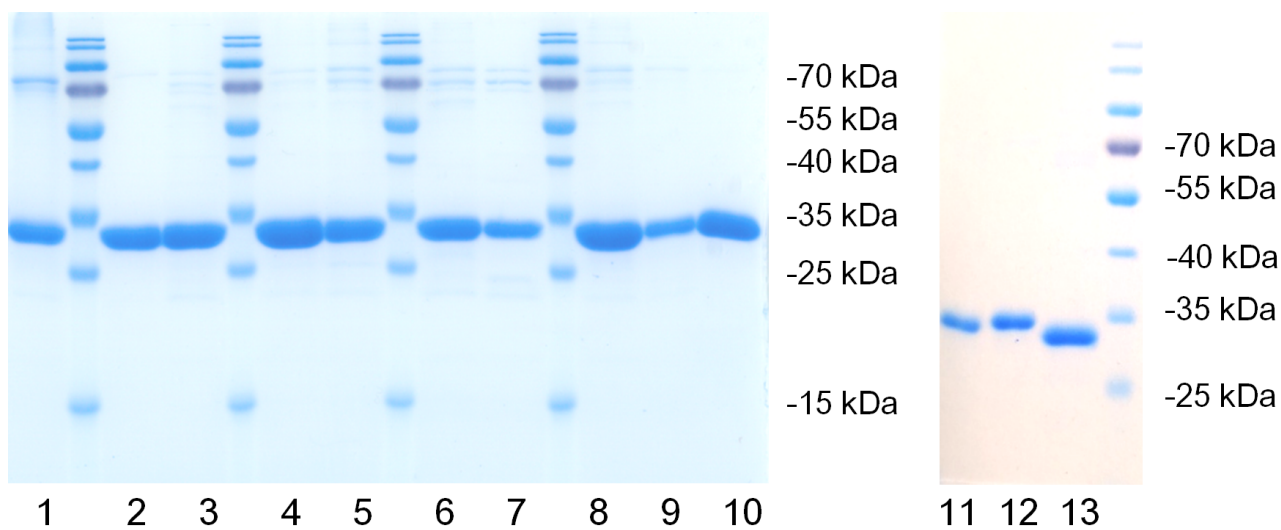

**Supplementary Fig. 15 | SDS-PAGE analysis of His-tagged proteins.** Lane 1-13: 63A, N65A, N65T, S114A, F133A, F133Y, T148S, N150A, I231A, SptF, loop truncation mutant  $\Delta$ 6 (Lys58-Val66),  $\Delta$ 9 (H61- Val66),  $\Delta$ 16 (Asn54-Lys69). All experiments were repeated independently more than three times with similar results.

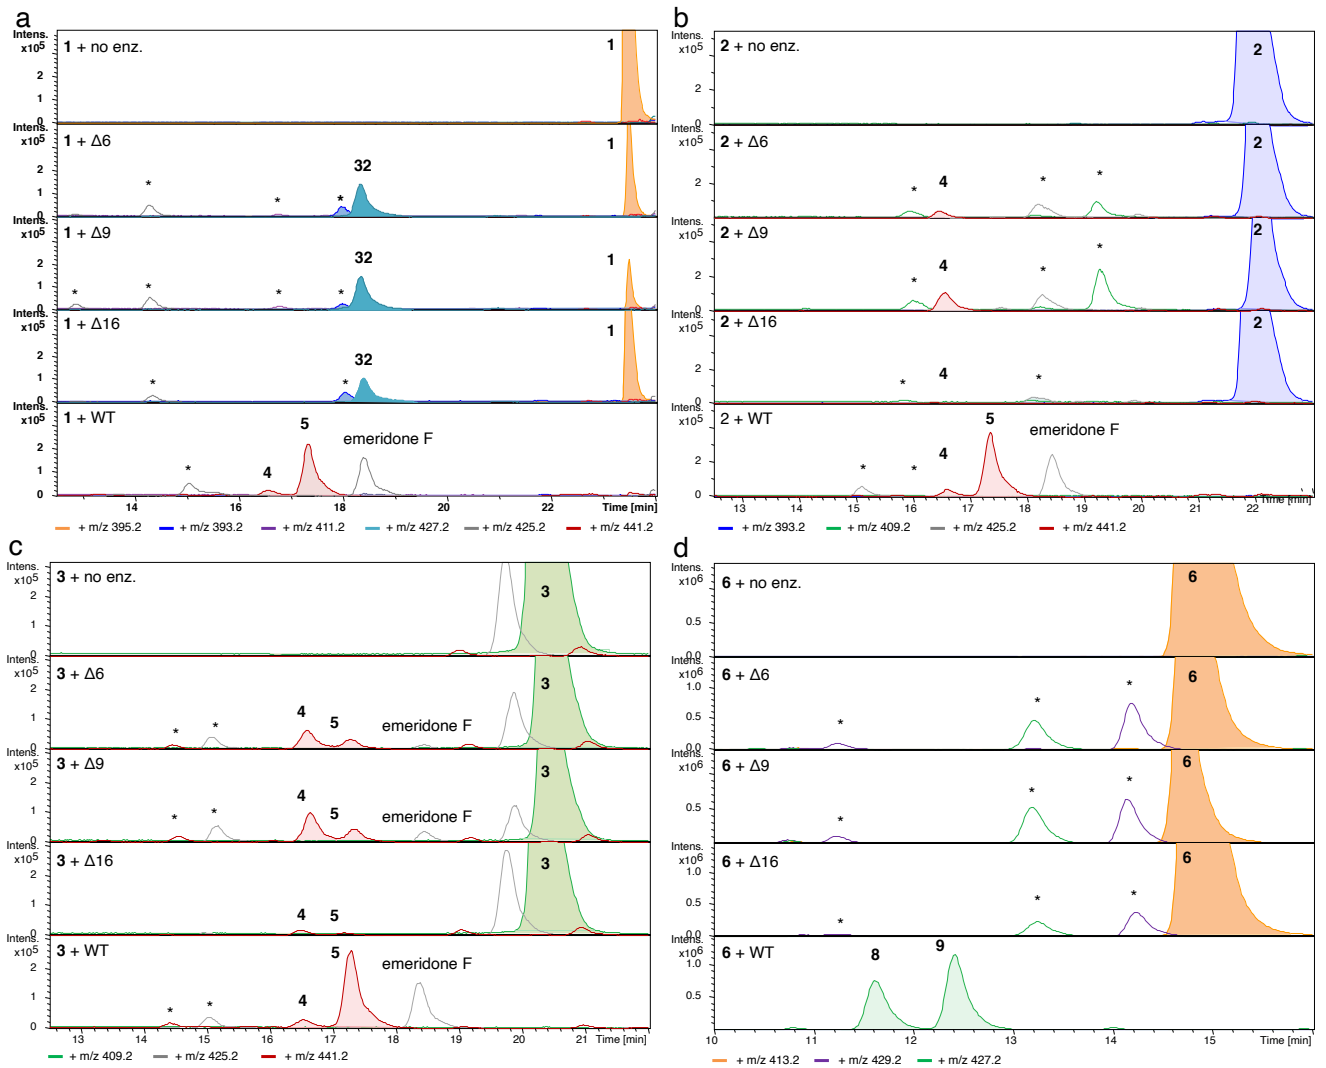

**Supplementary Fig. 16 | In vitro assay using SptF loop truncation mutants with a-d, 1-3, or 6 as**

**substrate, respectively.** Peaks marked with stars are structure undetermined enzymatic products due to low

yields. 40  $\mu$ M loop truncation mutant was incubated with 100  $\mu$ M substrate at 30  $^{\circ}$ C for 24 hrs.



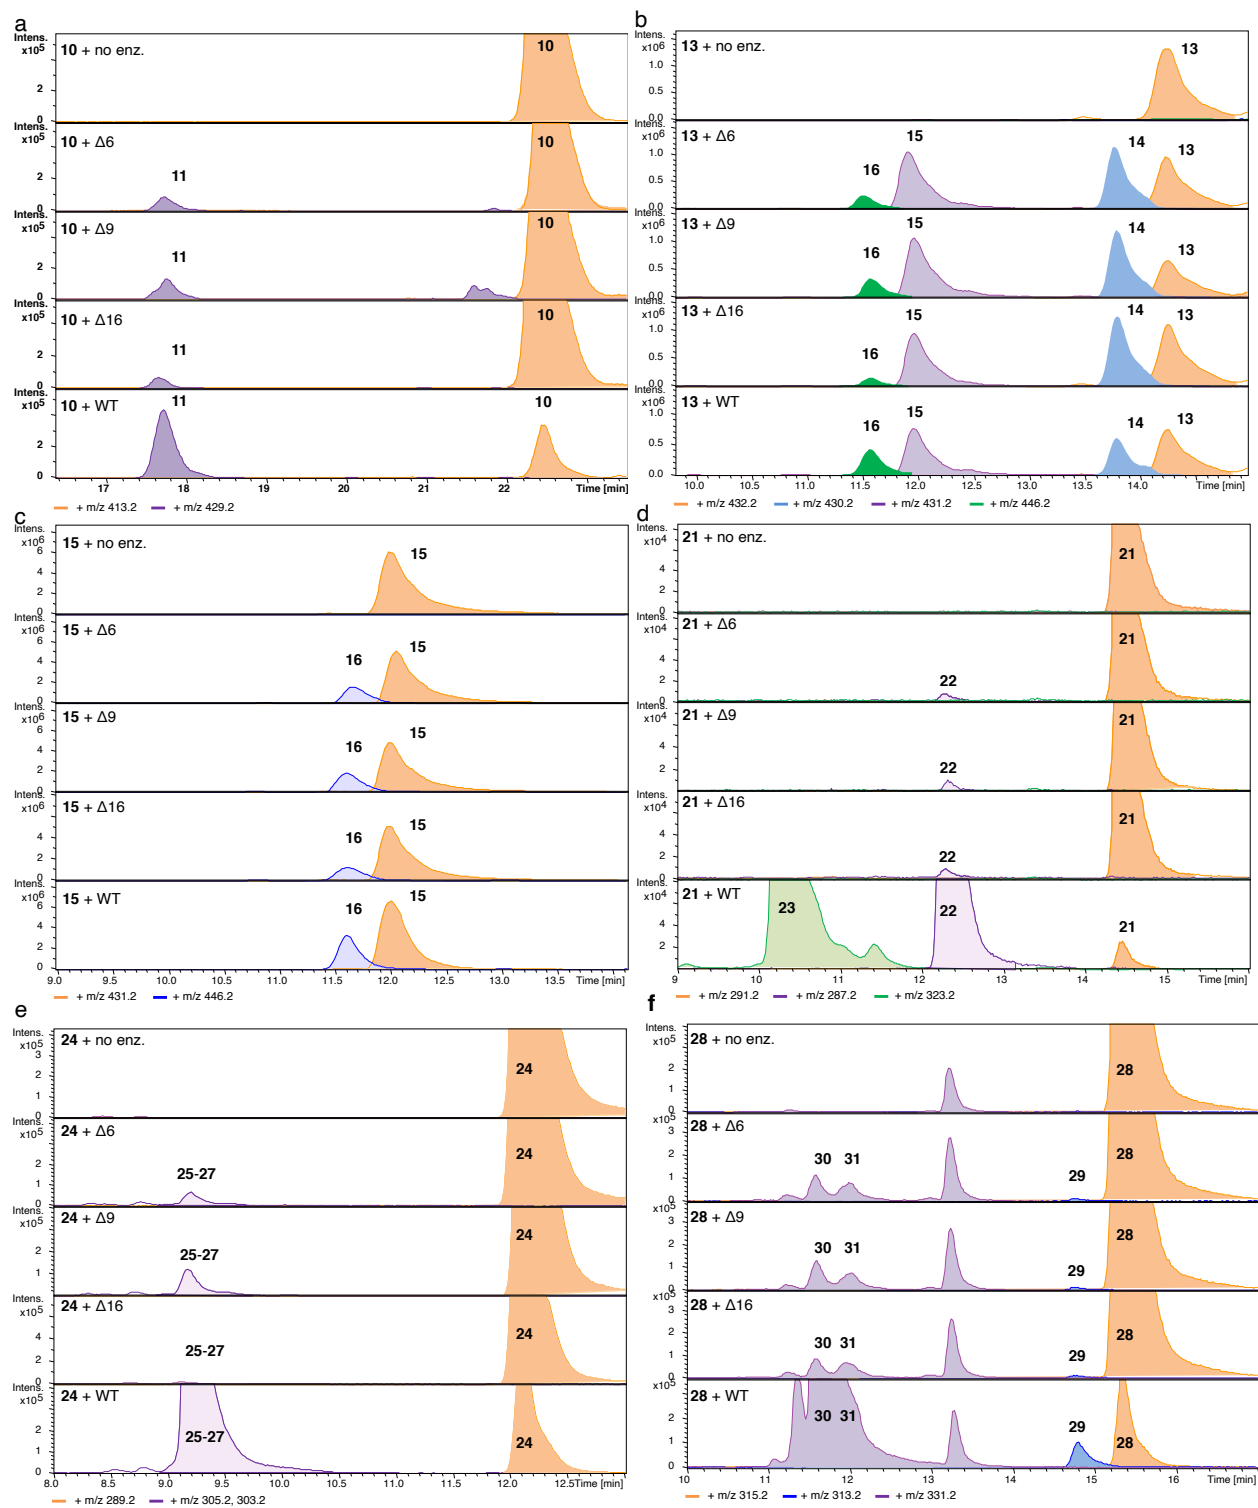

**Supplementary Fig. 17 | In vitro assay using loop truncation mutants with unnatural substrates a-f, 10, 13, 15, 21, 24, 28, respectively.** 40  $\mu$ M SptF truncation mutants were incubated with 100  $\mu$ M substrate at 30  $^{\circ}$ C for 24 hrs, and conversion rates were shown in Supplementary Table 5.

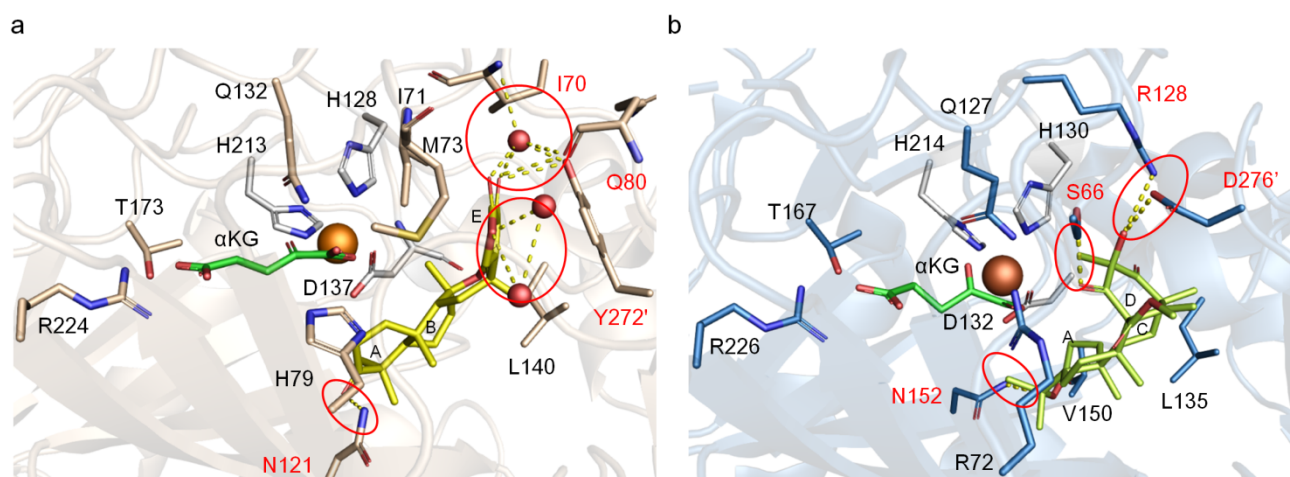

**Supplementary Fig. 18 | The substrate binding mode in AndA and PrhA.** **a**, In AndA (PDB:5ZM3, shown in wheat color) case, the D/E rings of preandiloid B (**10**, yellow sticks) was firmly fixed by residues (I70 and Q80) located on the lid-like loop and Y272' from adjacent monomer via hydrogen bond network, and A-ring of **10** was fixed by only one hydrogen bond via N121 in deeper cavity. **b**, Similarly, in PrhA case (PDB: 5YBO, shown in blue color), the A-ring of preausinoid A1 (shown as limone sticks) was firmly fixed with hydrogen bond networks via S66, R128, and D276', whereas the D-ring of preausinoid A1 was fixed by only one hydrogen bond via N152 in the deeper cavity. Note that water molecules are shown as red spheres, and Fe is shown as orange spheres.  $\alpha$ KG was shown as green sticks. Hydrogen networks are shown as yellow dash lines in the red boxes.



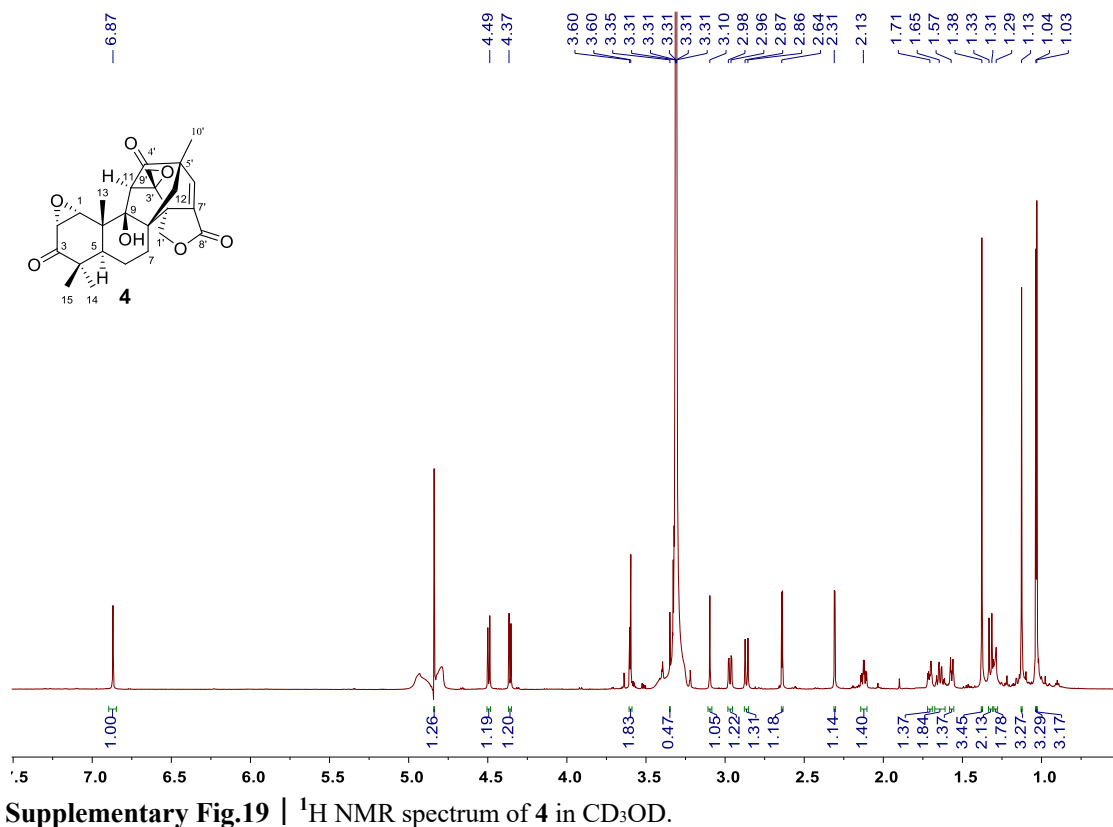

Supplementary Fig.19 |  $^1\text{H}$  NMR spectrum of **4** in  $\text{CD}_3\text{OD}$ .

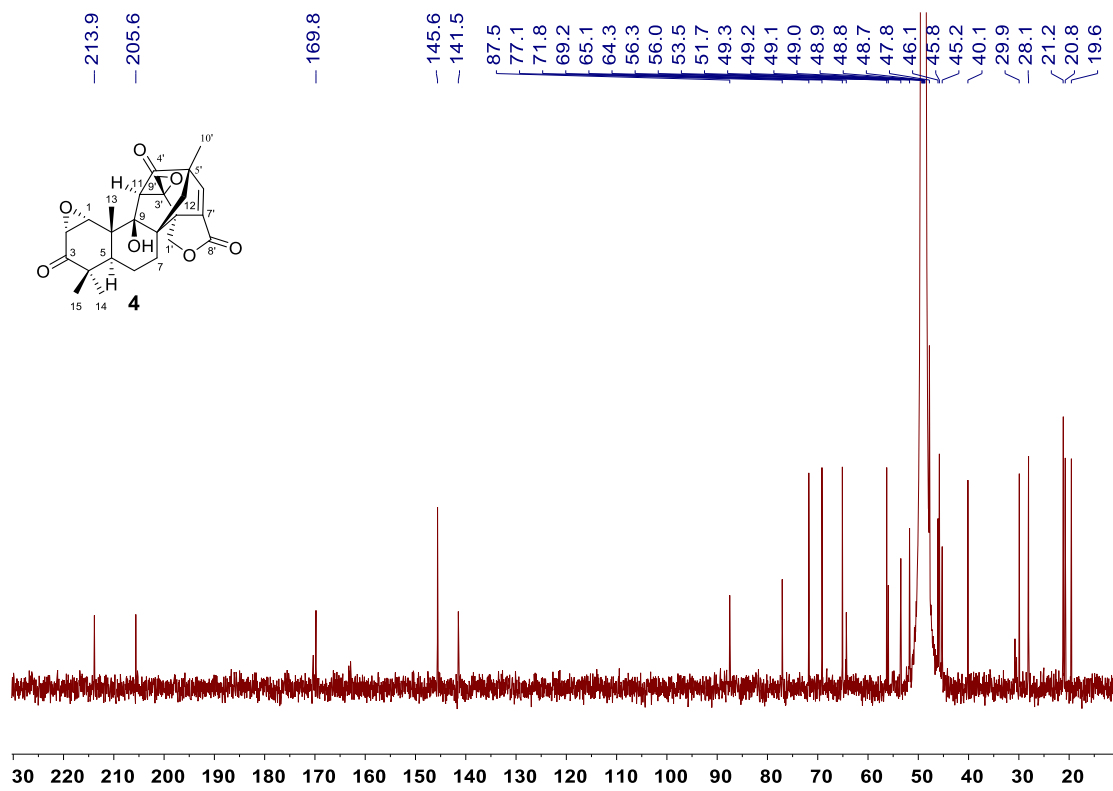

Supplementary Fig. 20 |  $^{13}\text{C}$  NMR spectrum of **4** in  $\text{CD}_3\text{OD}$ .

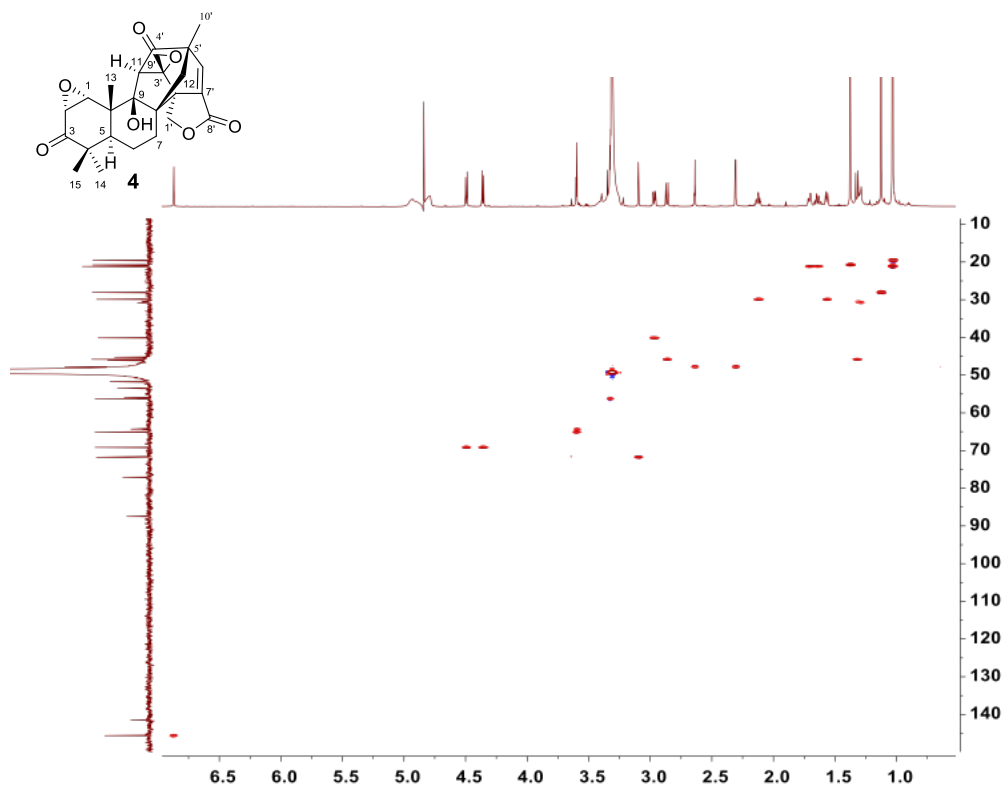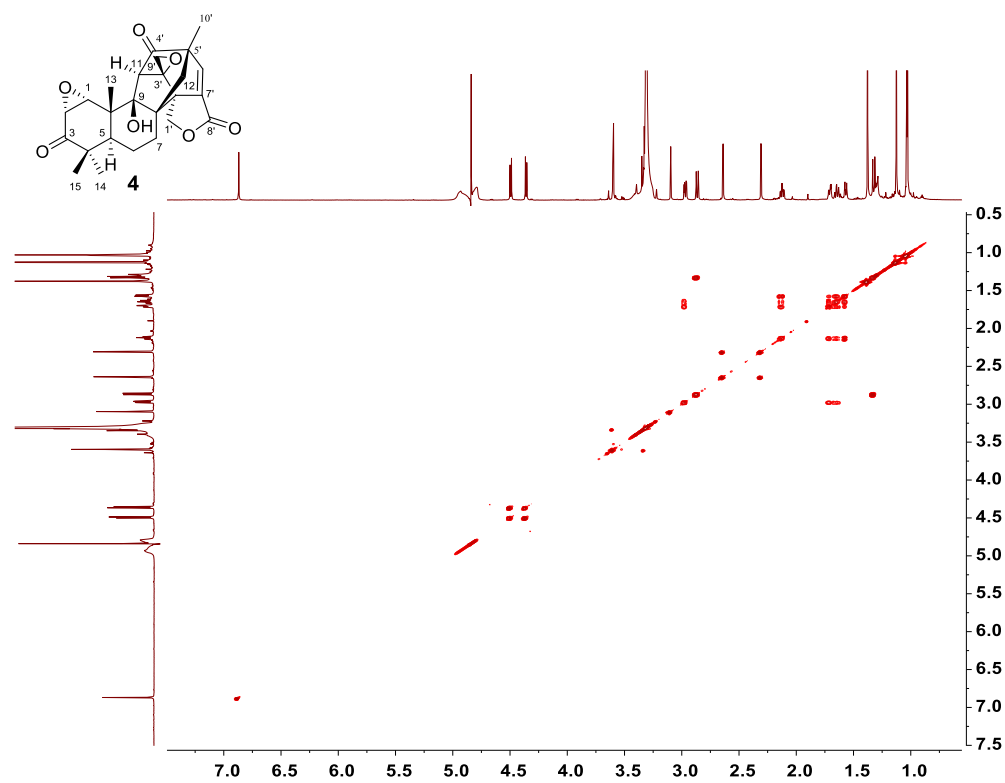

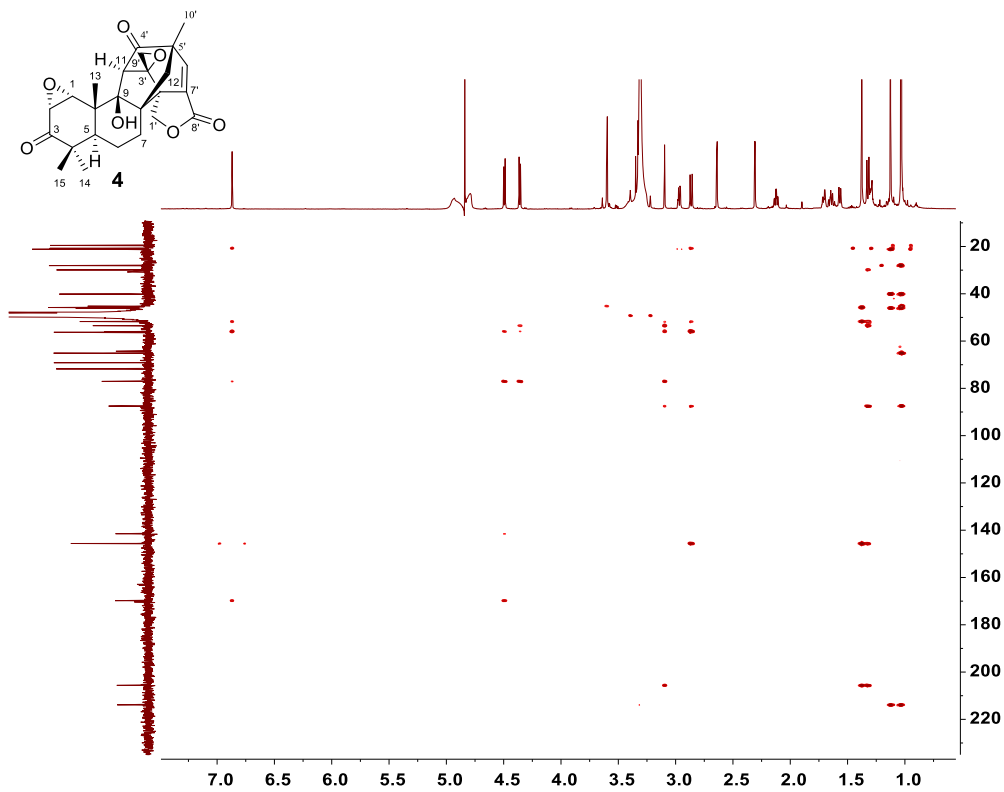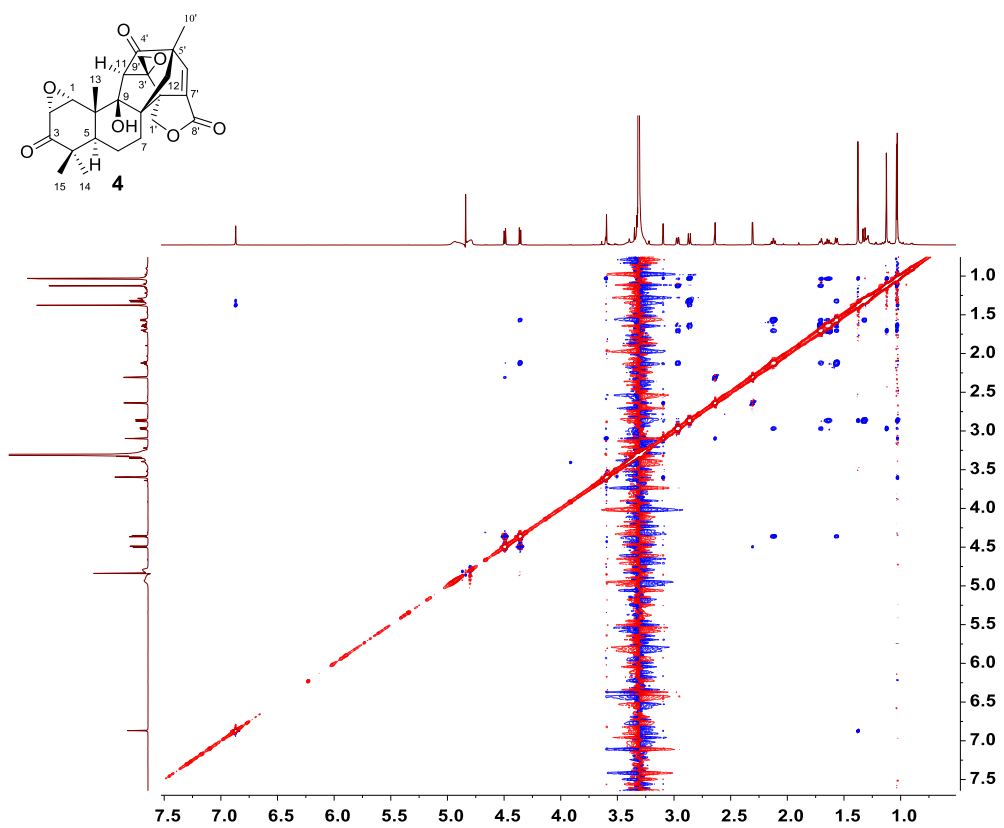



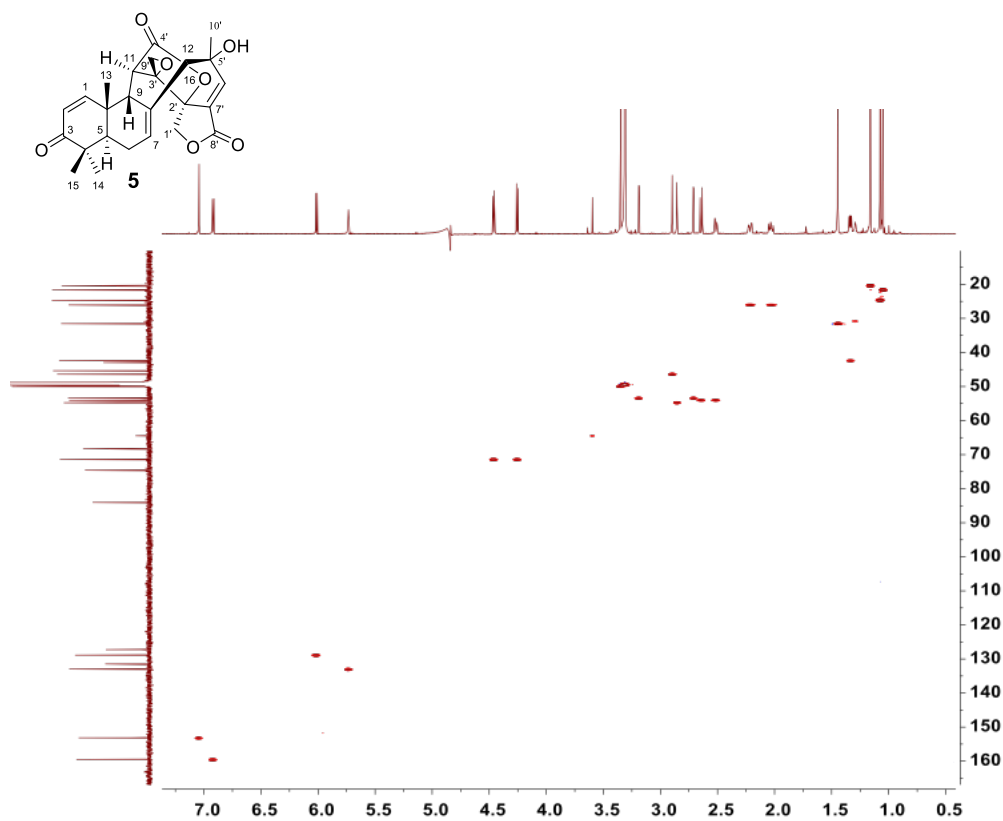

Supplementary Fig. 27 | HSQC NMR spectrum of **5** in CD<sub>3</sub>OD.

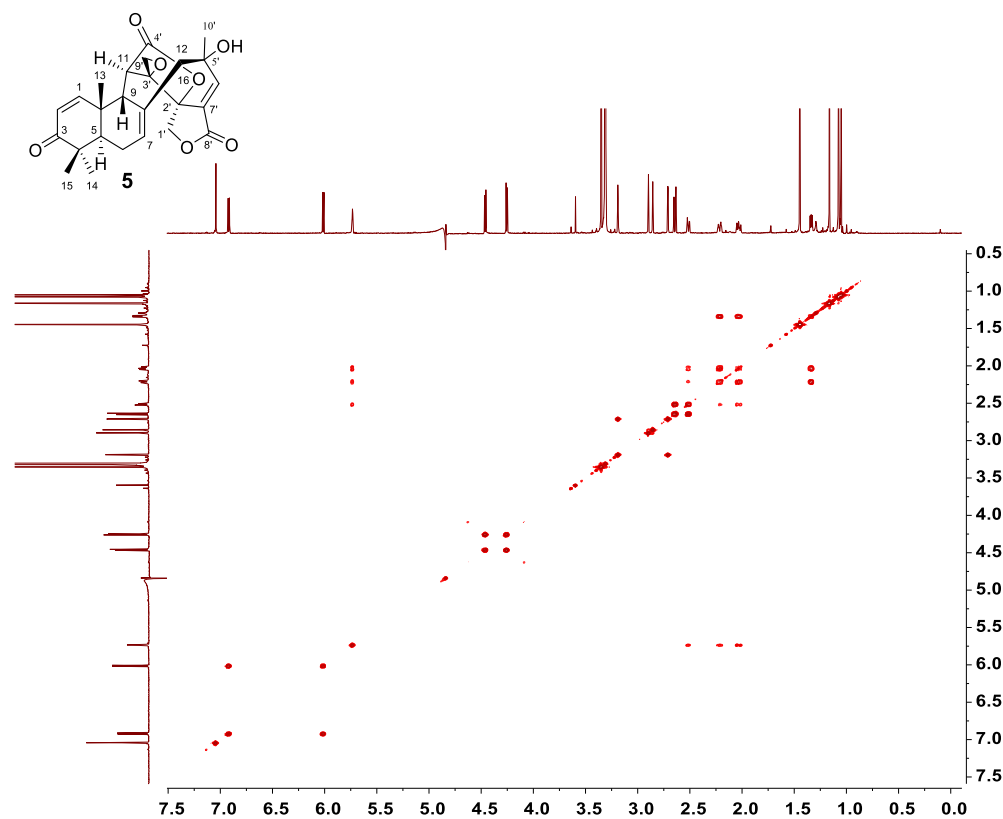

Supplementary Fig. 28 | COSY NMR spectrum of **5** in CD<sub>3</sub>OD.

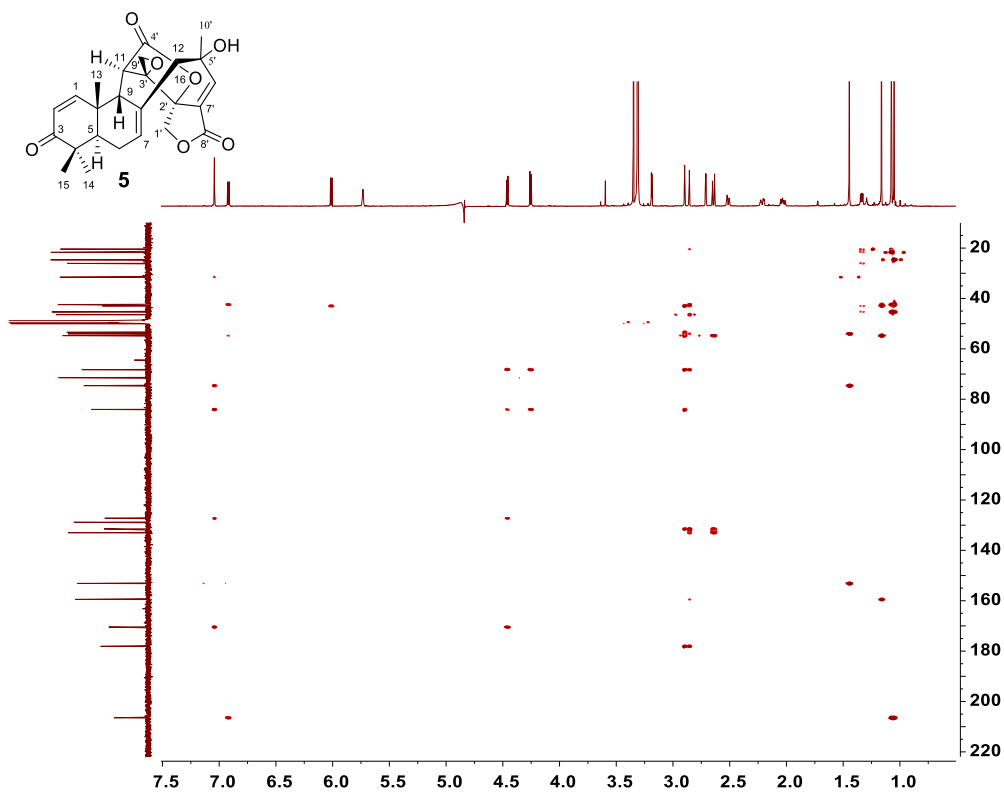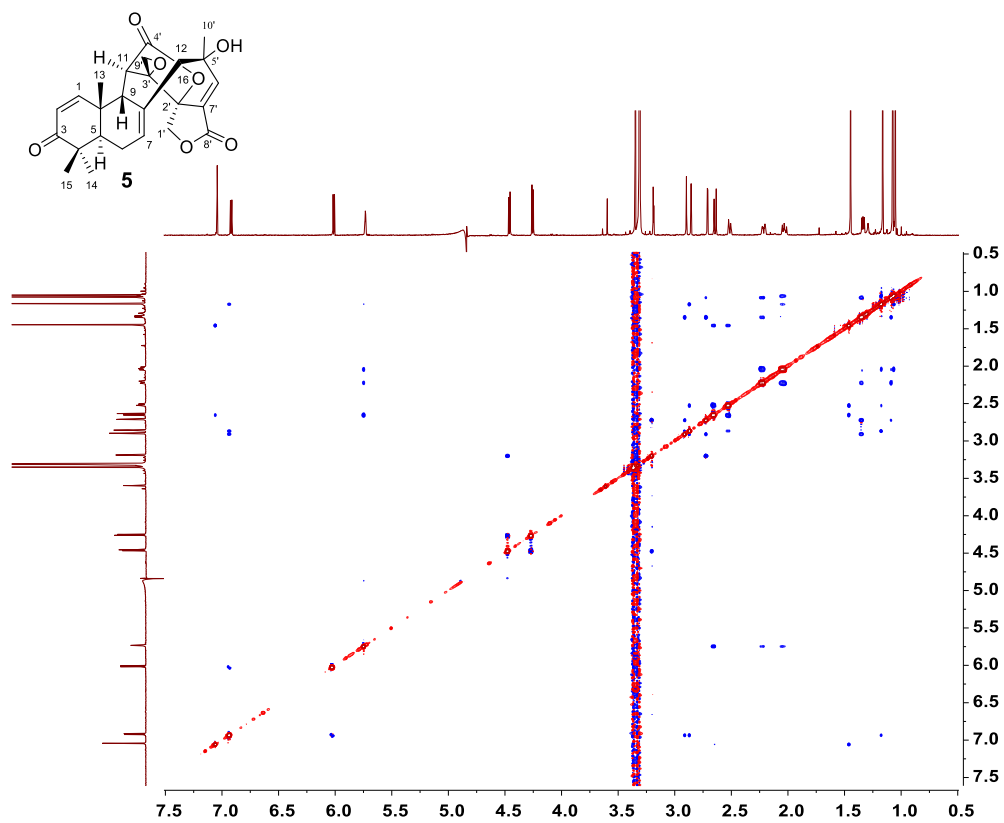

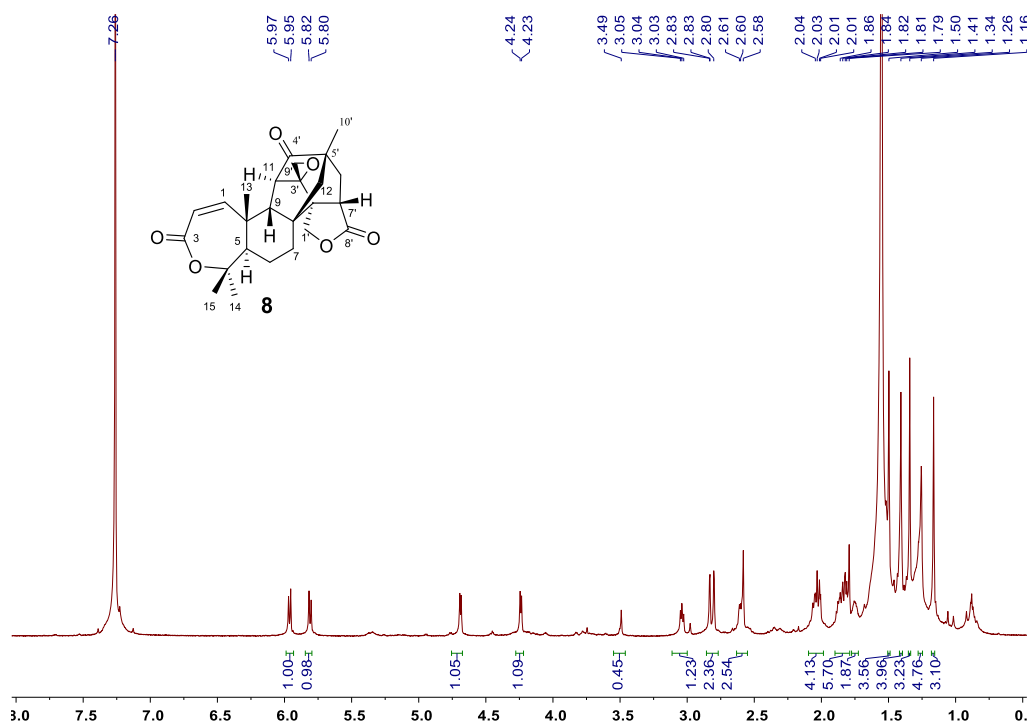

**Supplementary Fig. 31** |  $^1\text{H}$  NMR spectrum of **8** in  $\text{CDCl}_3$ .

1

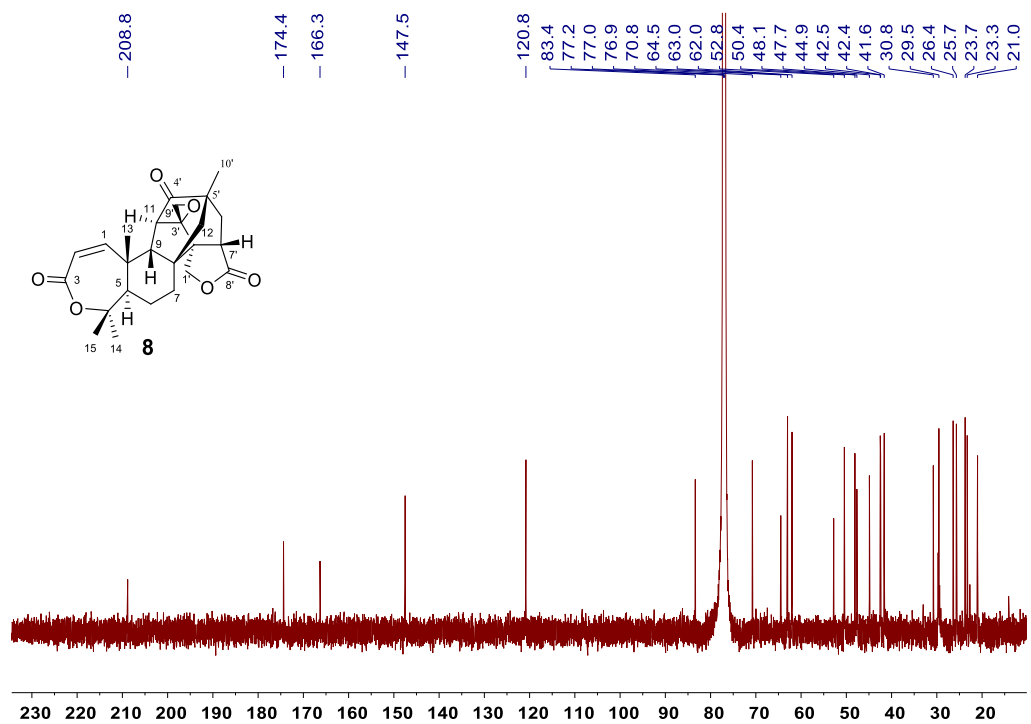

**Supplementary Fig. 32** |  $^{13}\text{C}$  NMR spectrum of **8** in  $\text{CDCl}_3$ .

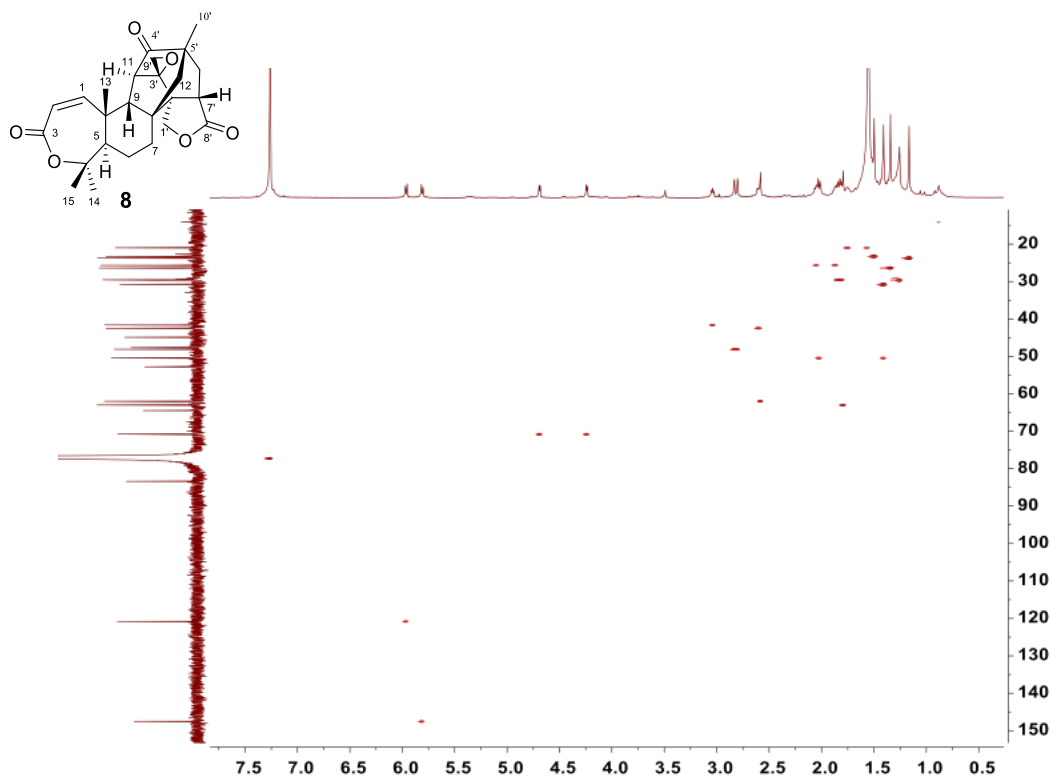

Supplementary Fig. 33 | HSQC NMR spectrum of **8** in CDCl<sub>3</sub>.

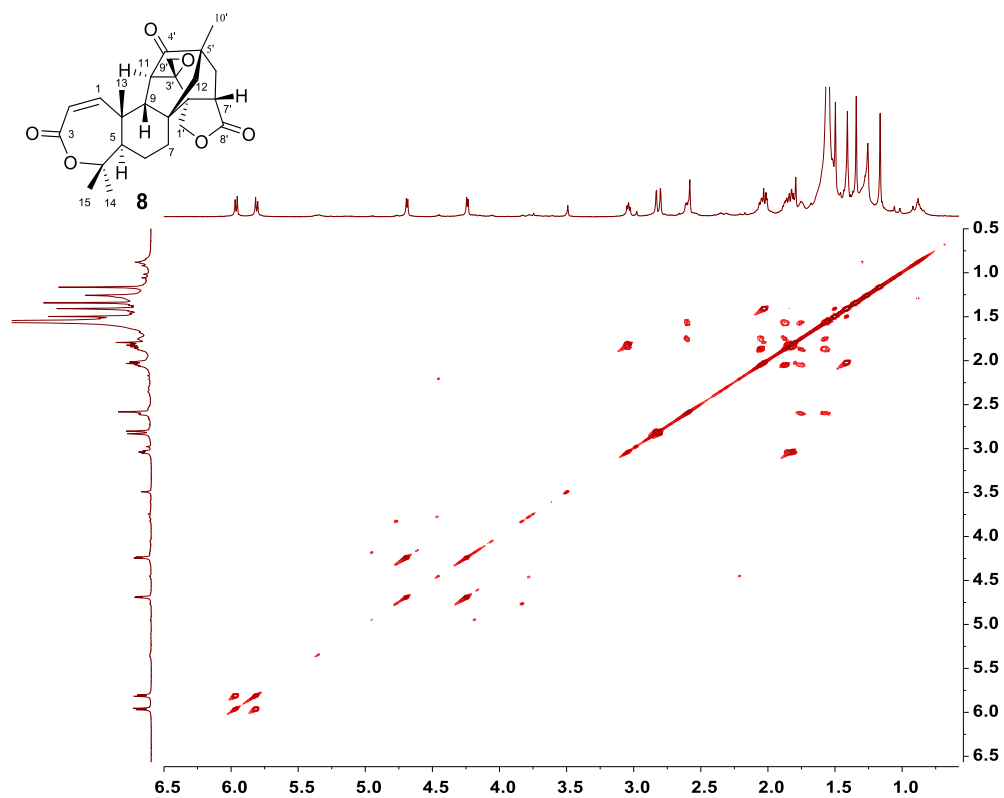

Supplementary Fig. 34 | COSY NMR spectrum of **8** in CDCl<sub>3</sub>.



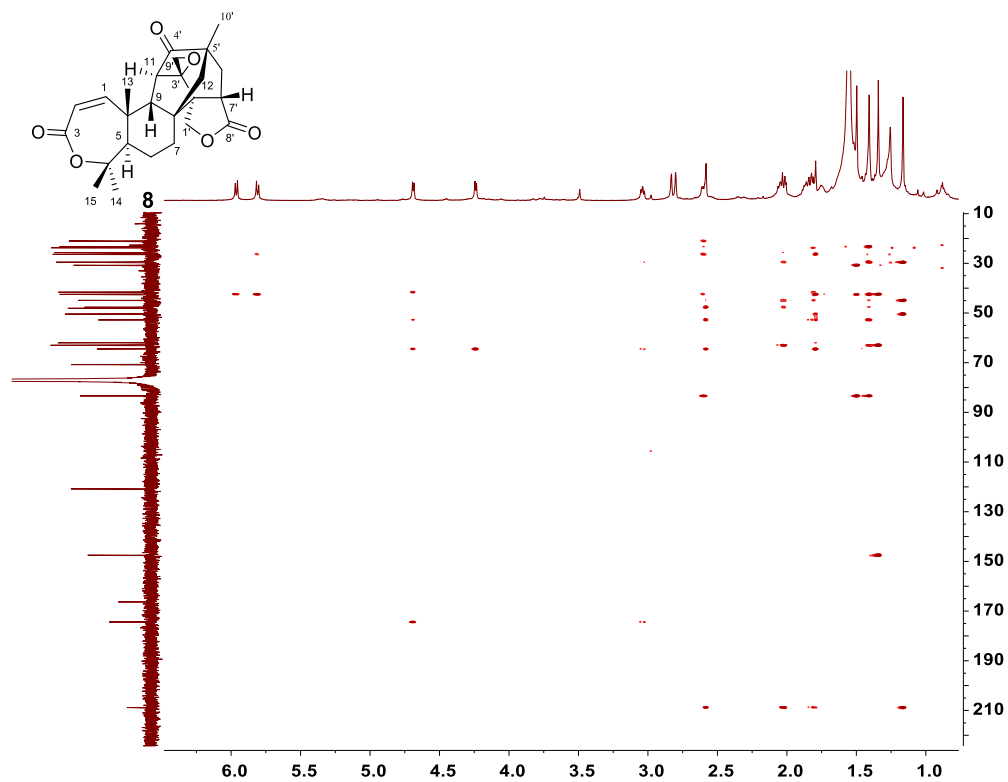

Supplementary Fig. 35 | HMBC NMR spectrum of **8** in CDCl<sub>3</sub>.

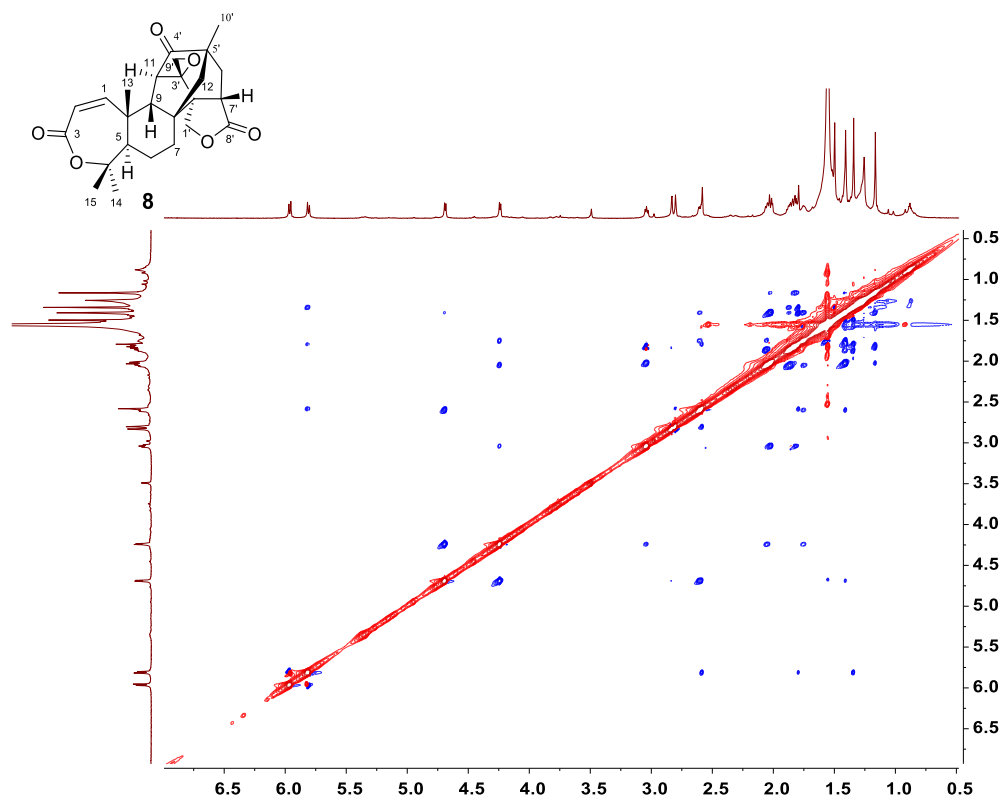

Supplementary Fig. 36 | NOESY NMR spectrum of **8** in CDCl<sub>3</sub>.

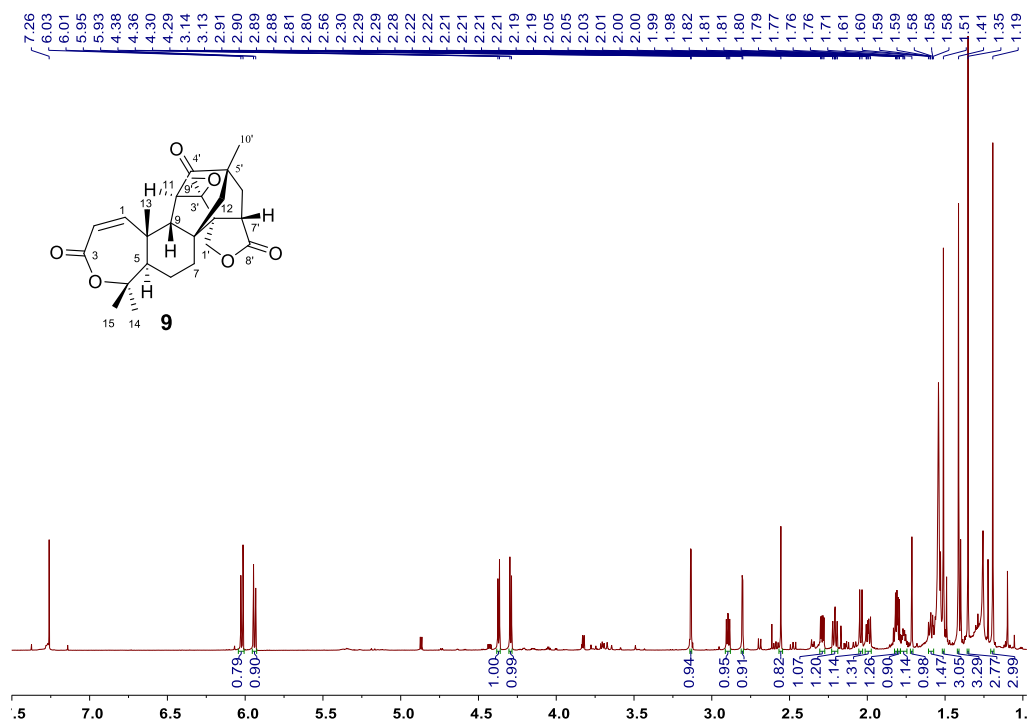

**Supplementary Fig. 37 |  $^1\text{H}$  NMR spectrum of **9** in  $\text{CDCl}_3$ .**

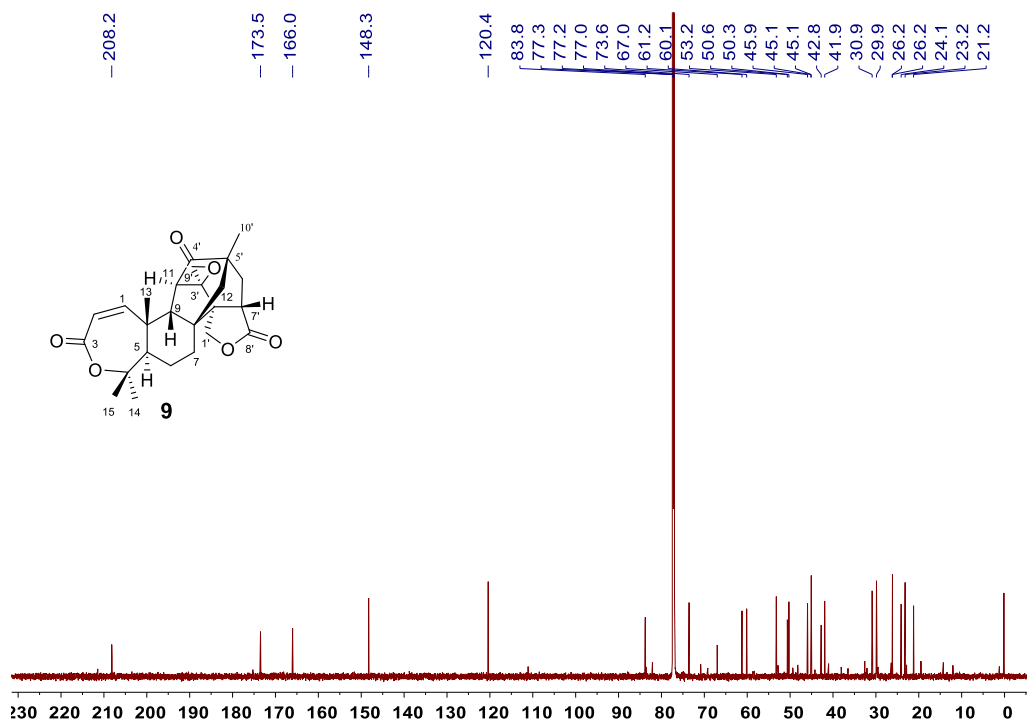

**Supplementary Fig. 38 |  $^{13}\text{C}$  NMR spectrum of **9** in  $\text{CDCl}_3$ .**

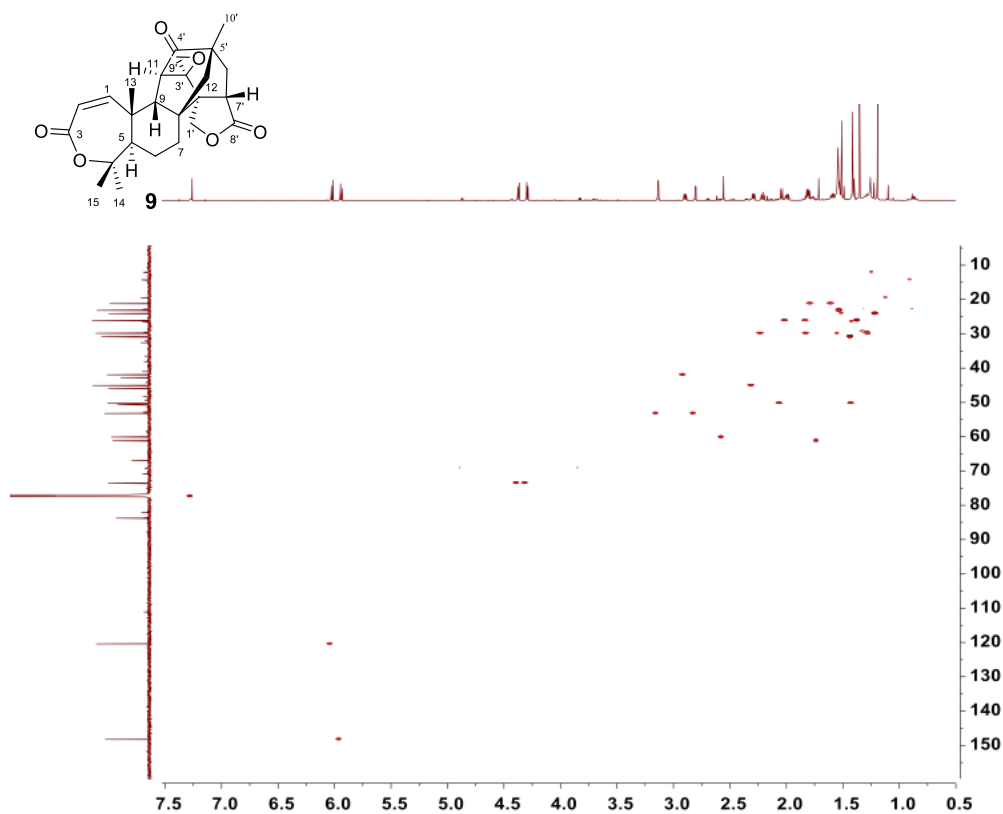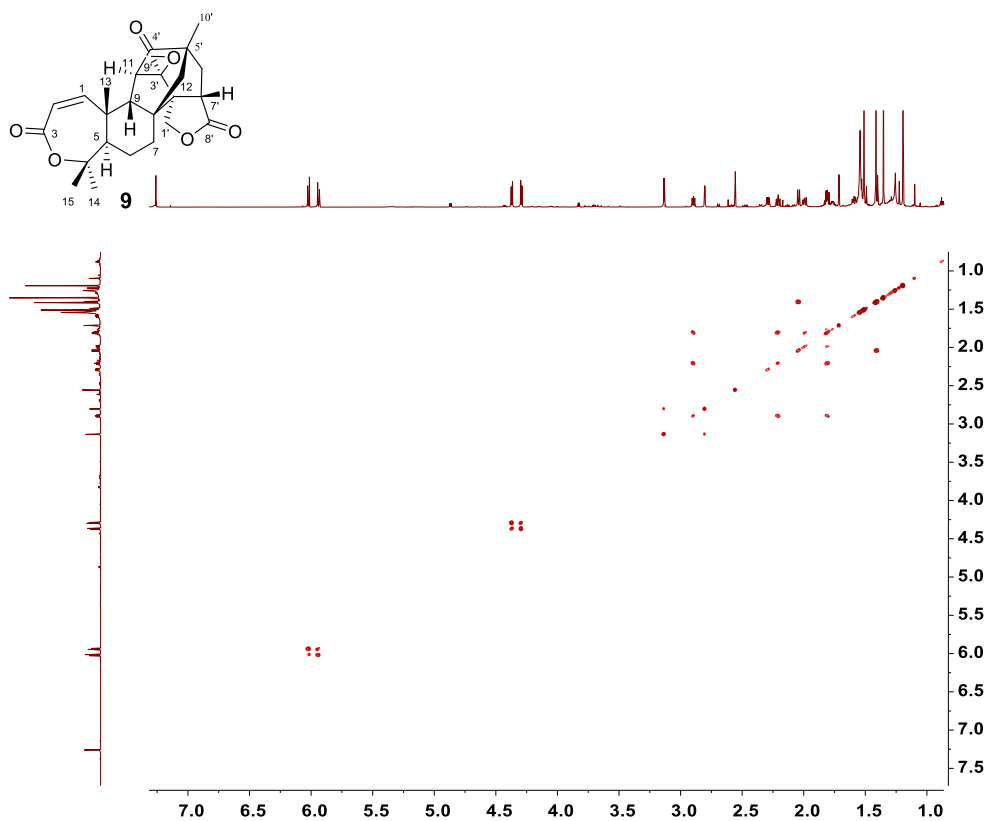

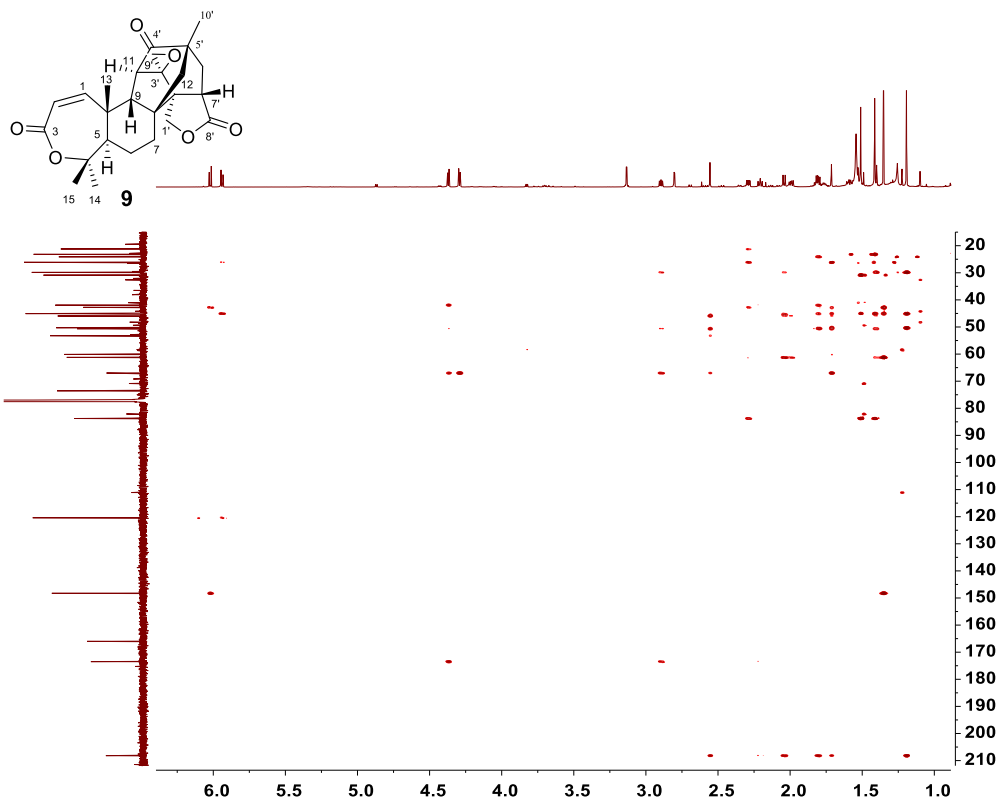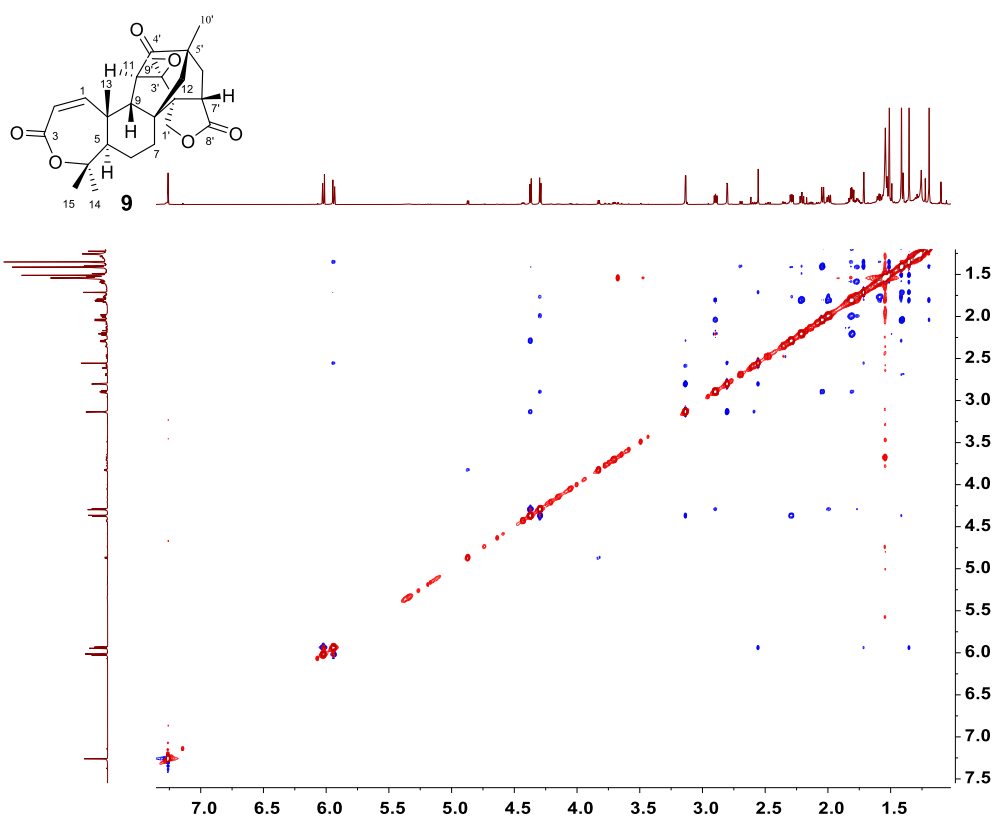

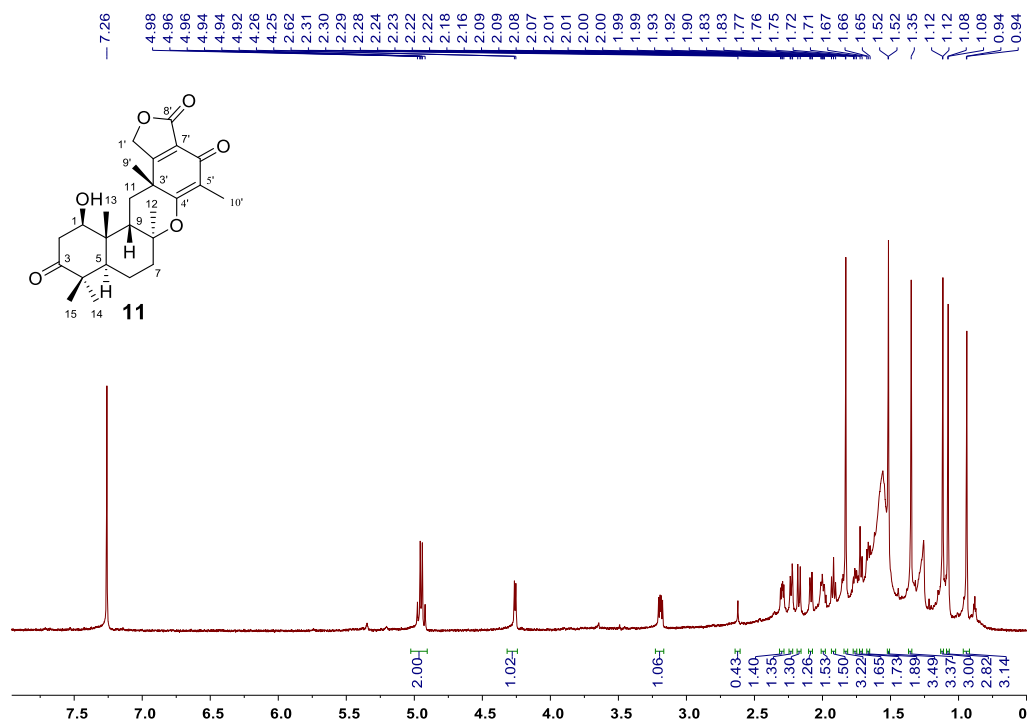

Supplementary Fig. 43 | <sup>1</sup>H NMR spectrum of **11** in CDCl<sub>3</sub>.

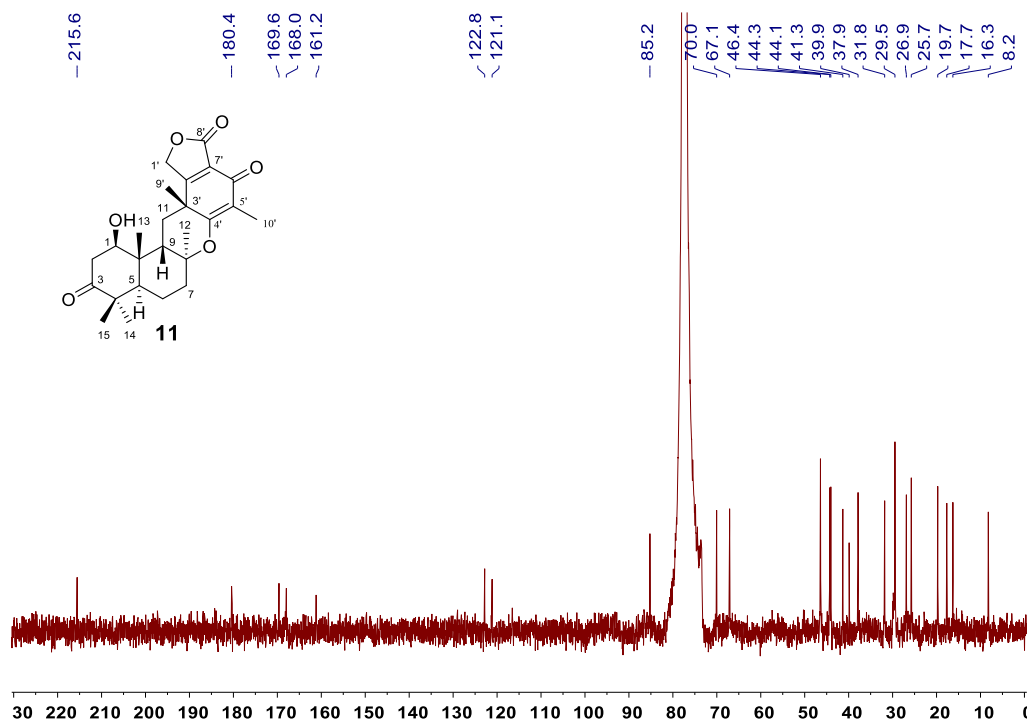

Supplementary Fig. 44 | <sup>13</sup>C NMR spectrum of **11** in CDCl<sub>3</sub>.

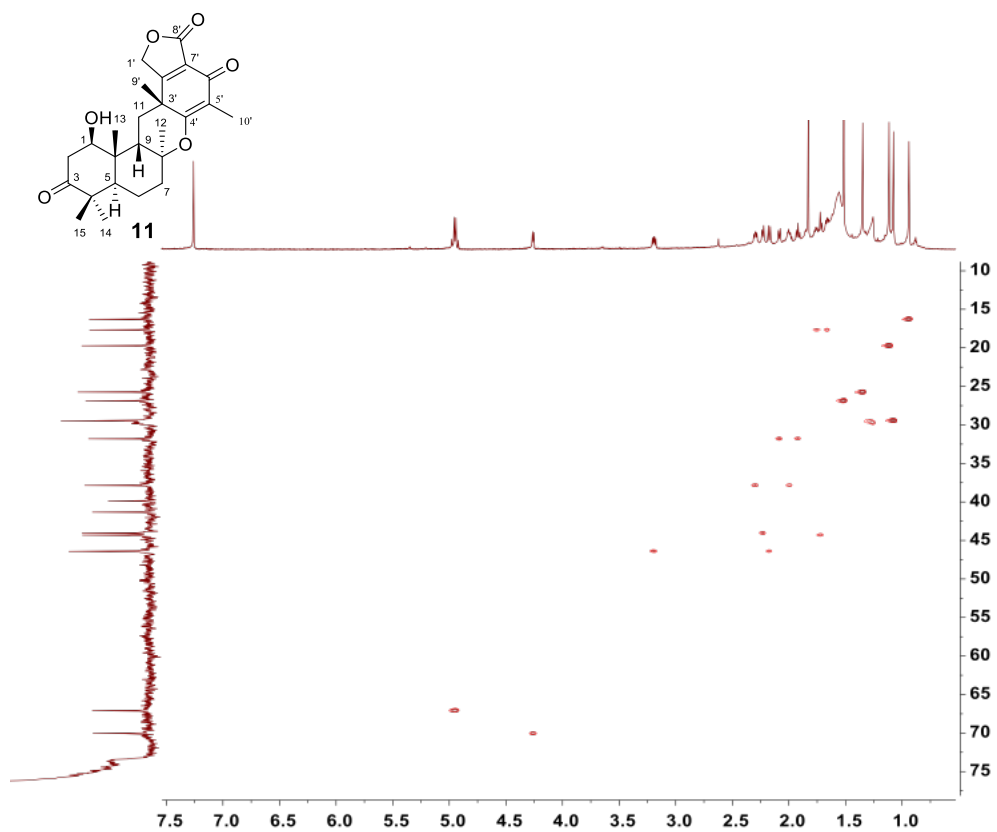

Supplementary Fig. 45 | HSQC NMR spectrum of **11** in CDCl<sub>3</sub>.

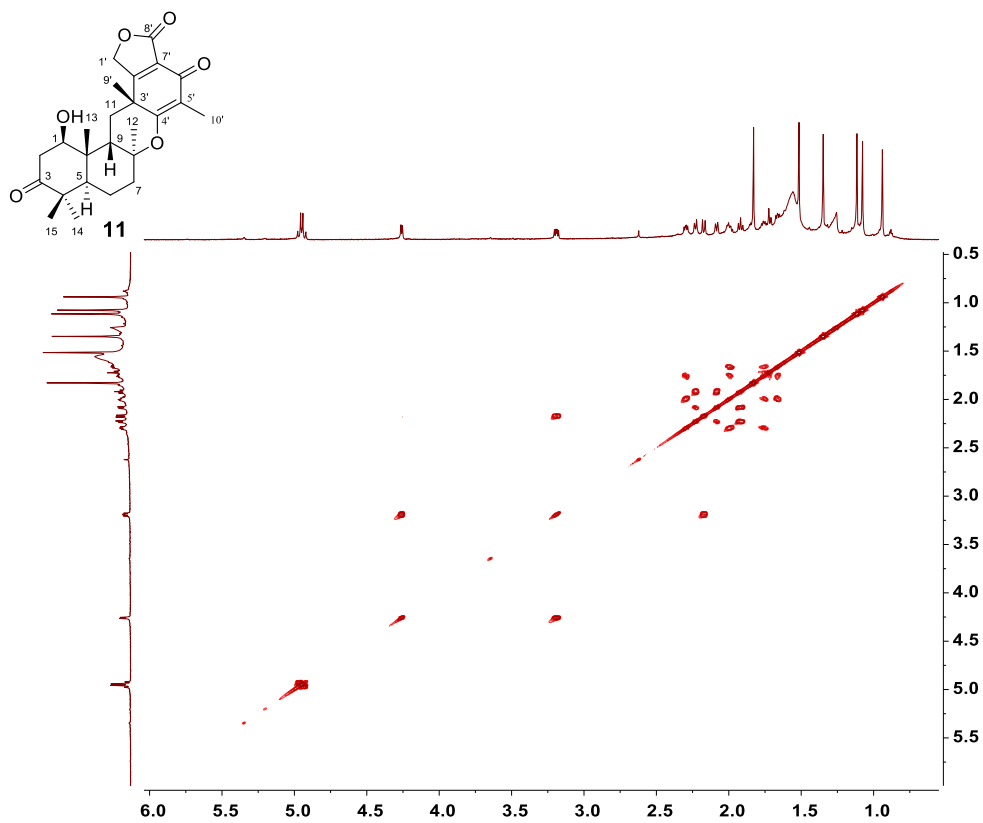

Supplementary Fig. 46 | COSY NMR spectrum of **11** in CDCl<sub>3</sub>.

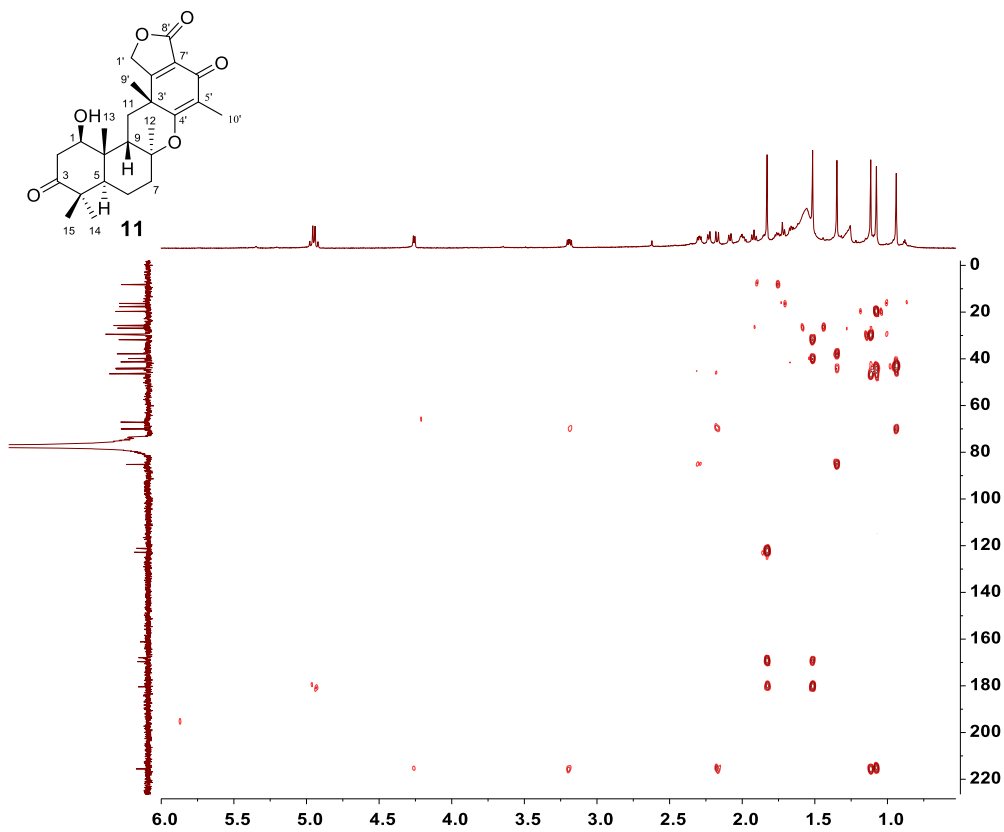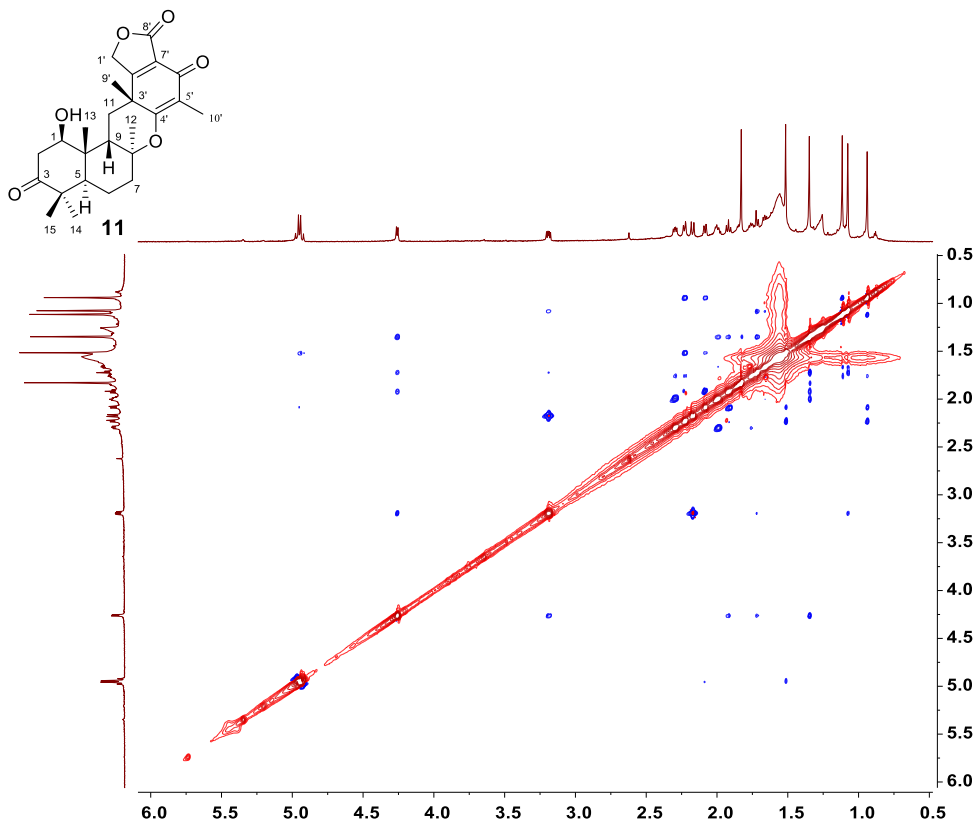

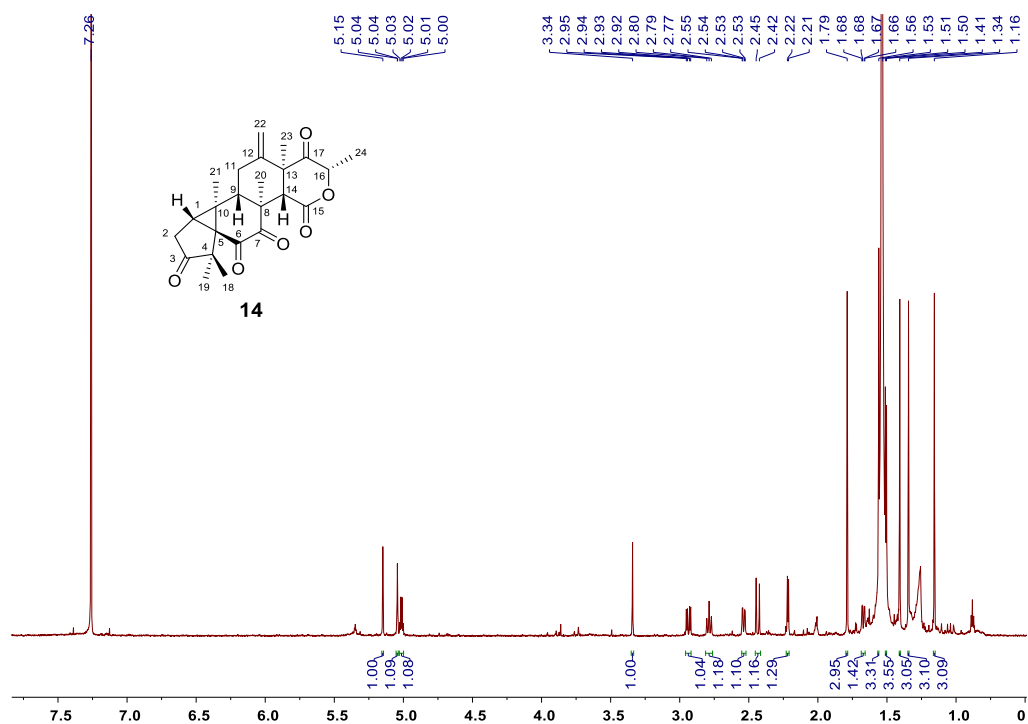

Supplementary Fig. 49 |  $^1\text{H}$  NMR spectrum of **14** in  $\text{CDCl}_3$ .

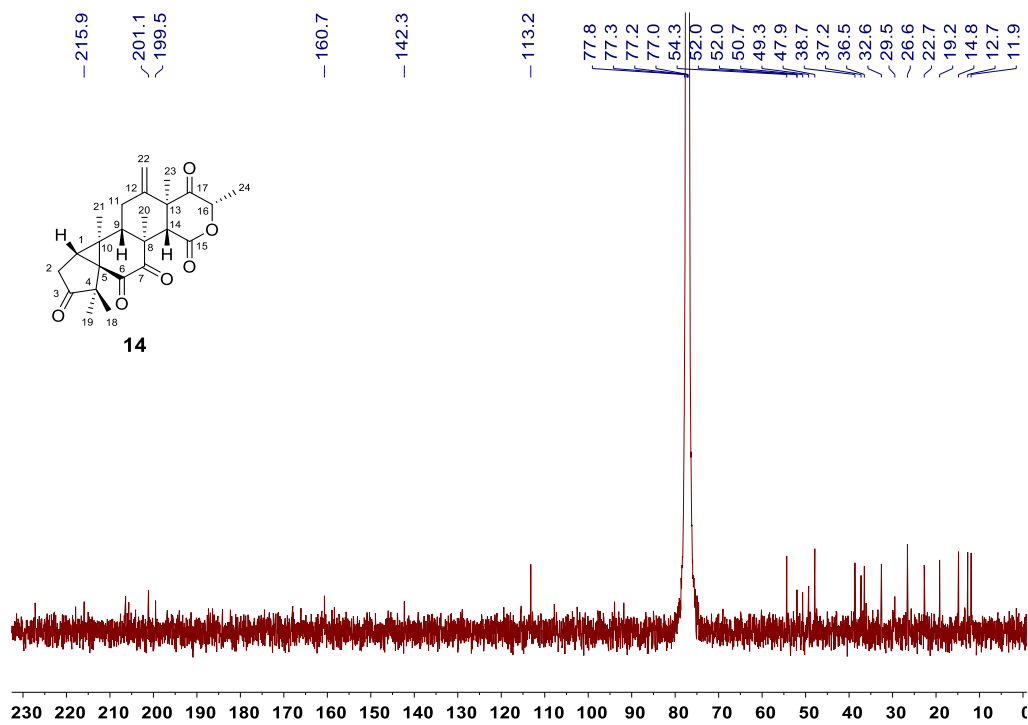

Supplementary Fig. 50 |  $^{13}\text{C}$  NMR spectrum of **14** in  $\text{CDCl}_3$ .



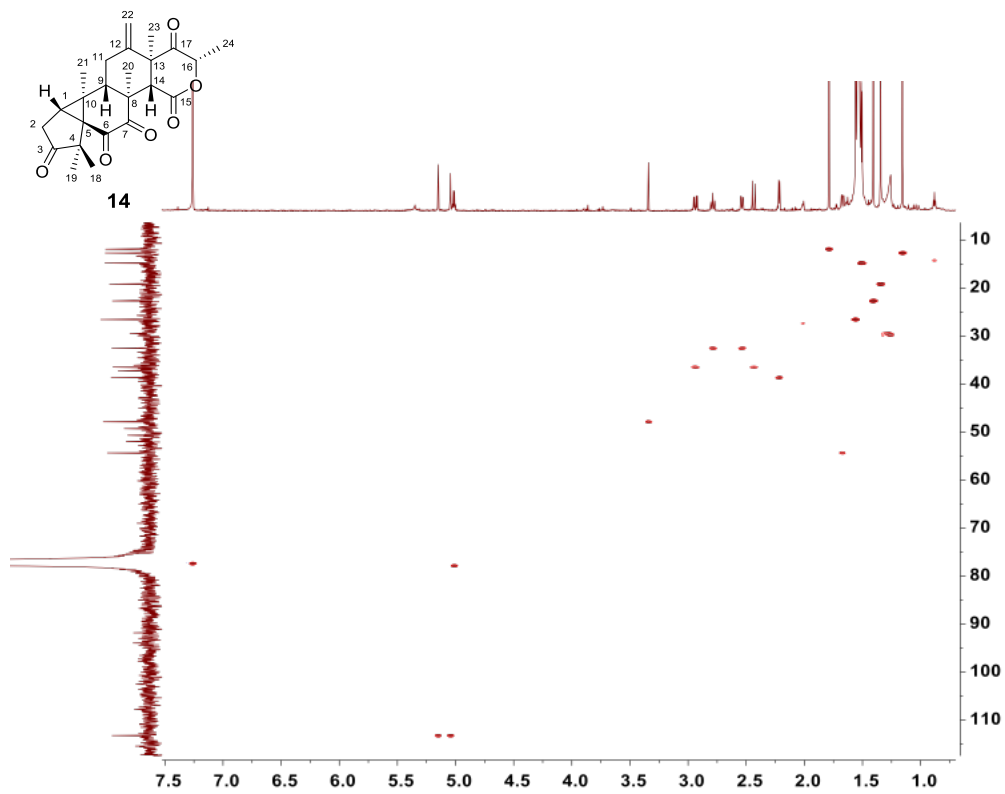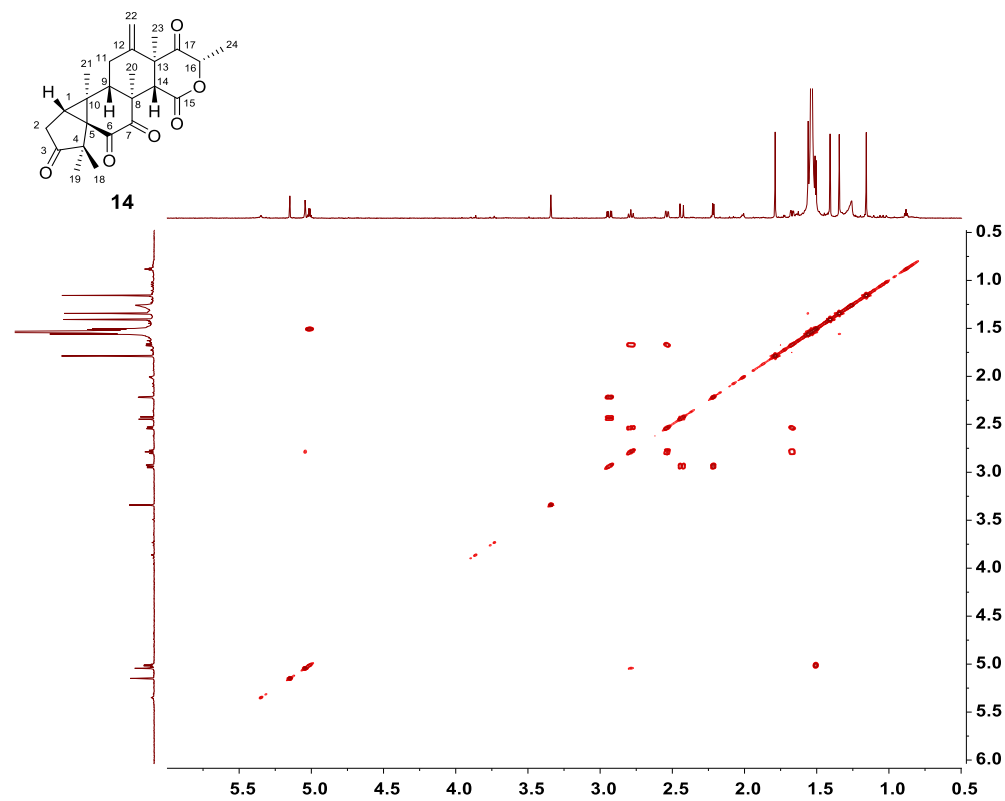

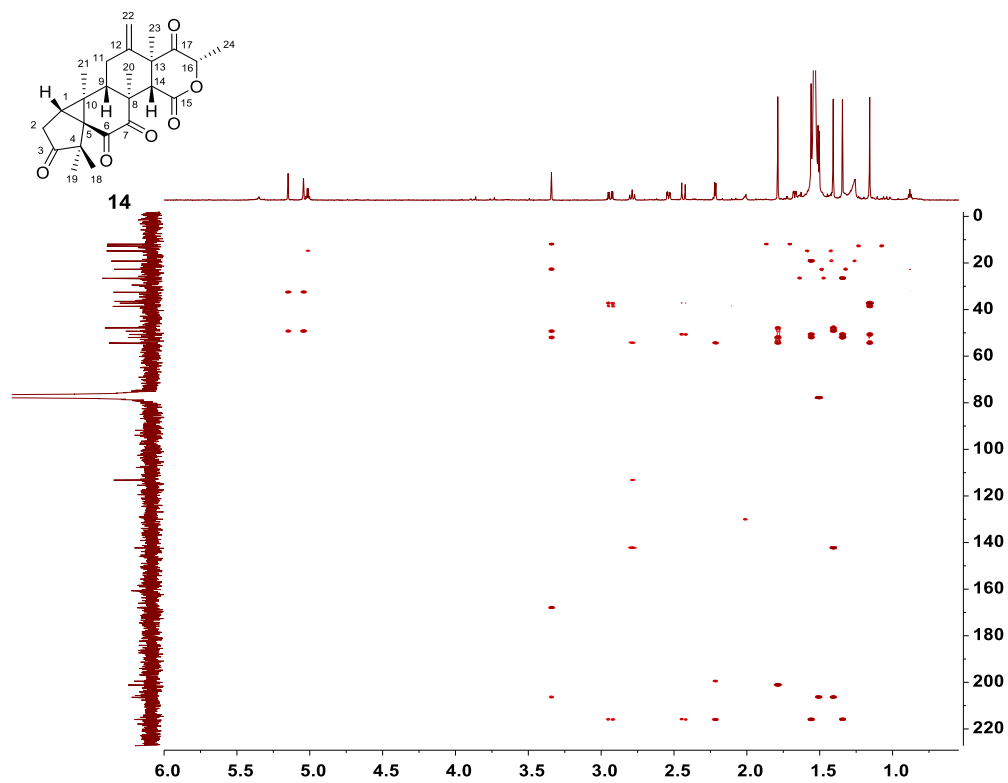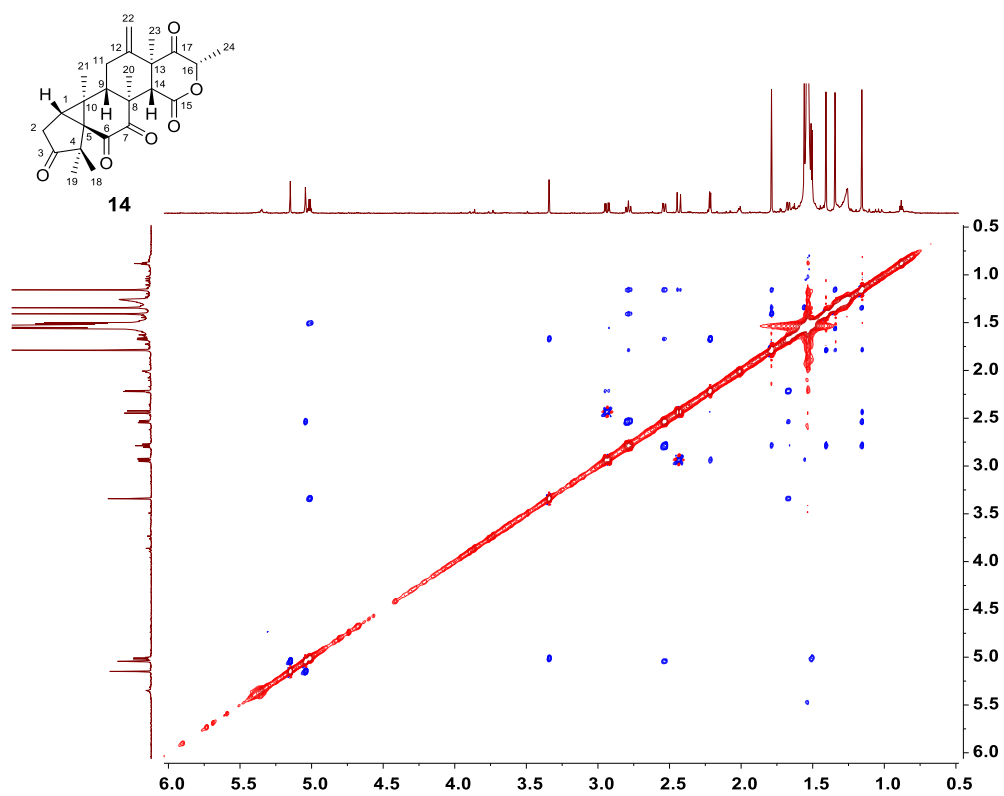

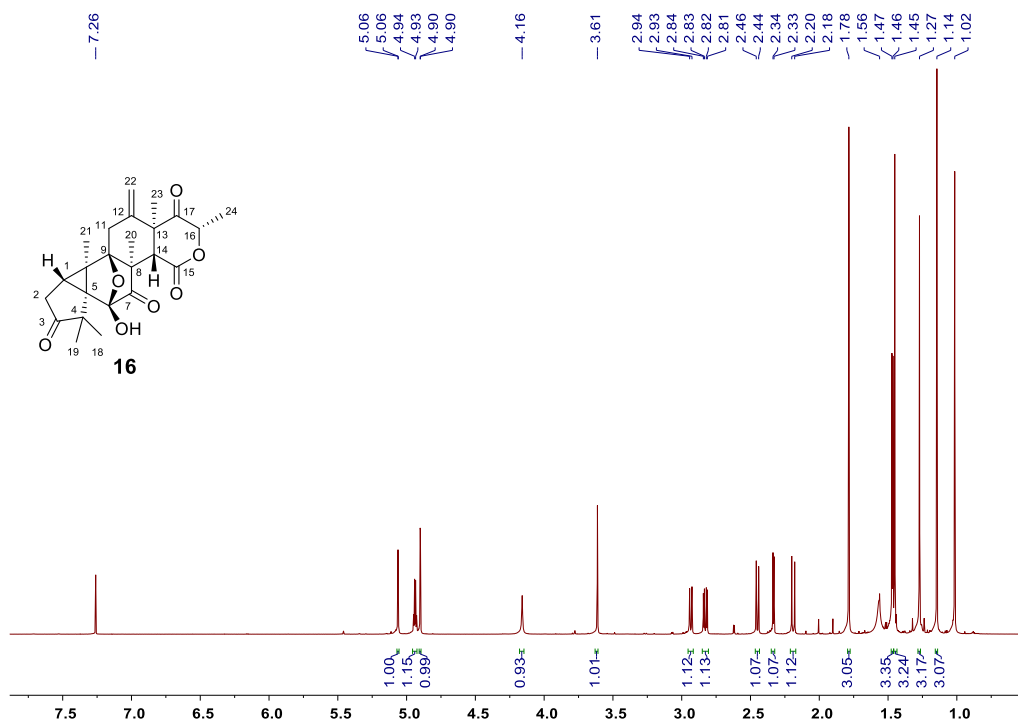

Supplementary Fig. 55 | <sup>1</sup>H NMR spectrum of **16** in CDCl<sub>3</sub>.

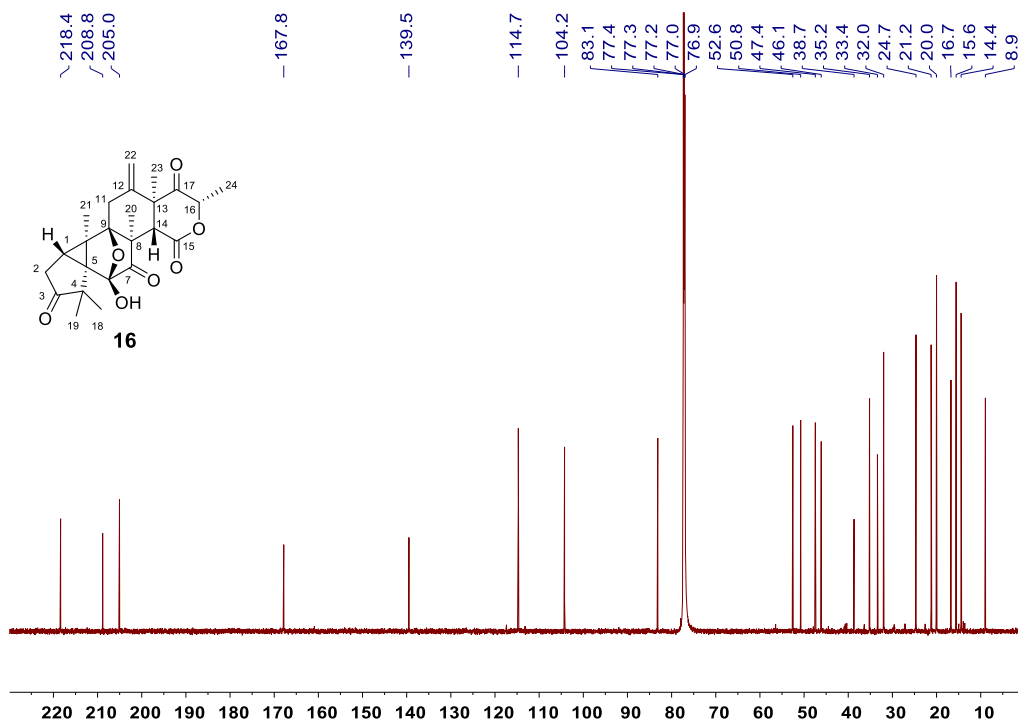

Supplementary Fig. 56 | <sup>13</sup>C NMR spectrum of **16** in CDCl<sub>3</sub>.

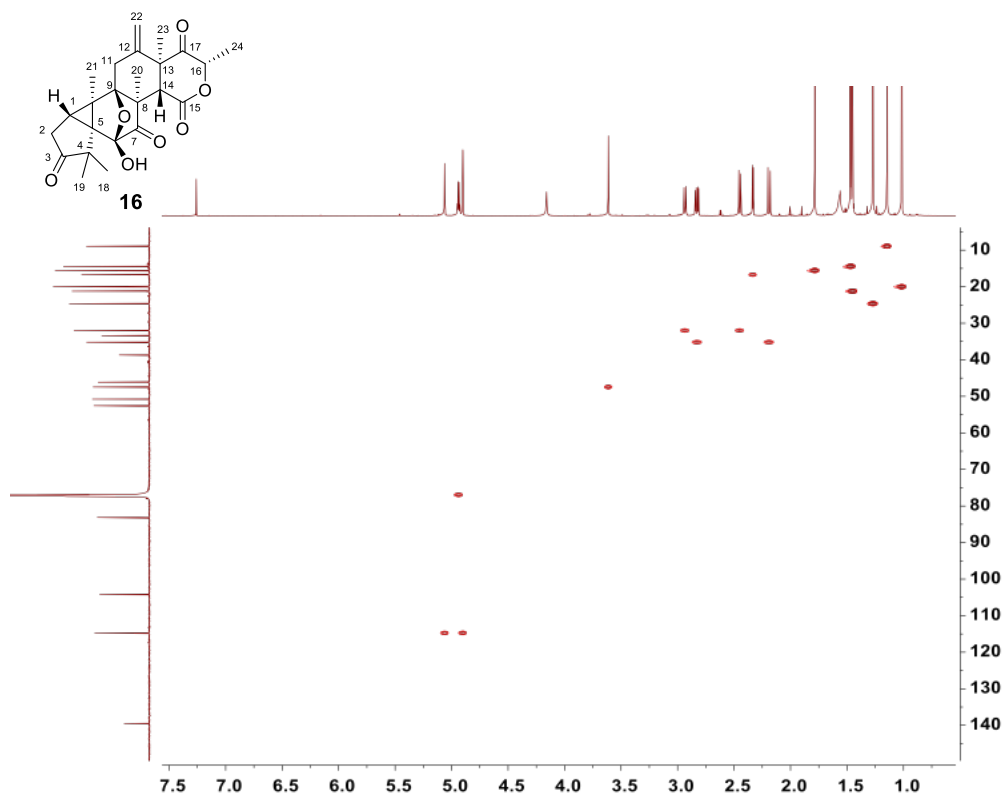

Supplementary Fig. 57 | HSQC NMR spectrum of **16** in CDCl<sub>3</sub>.

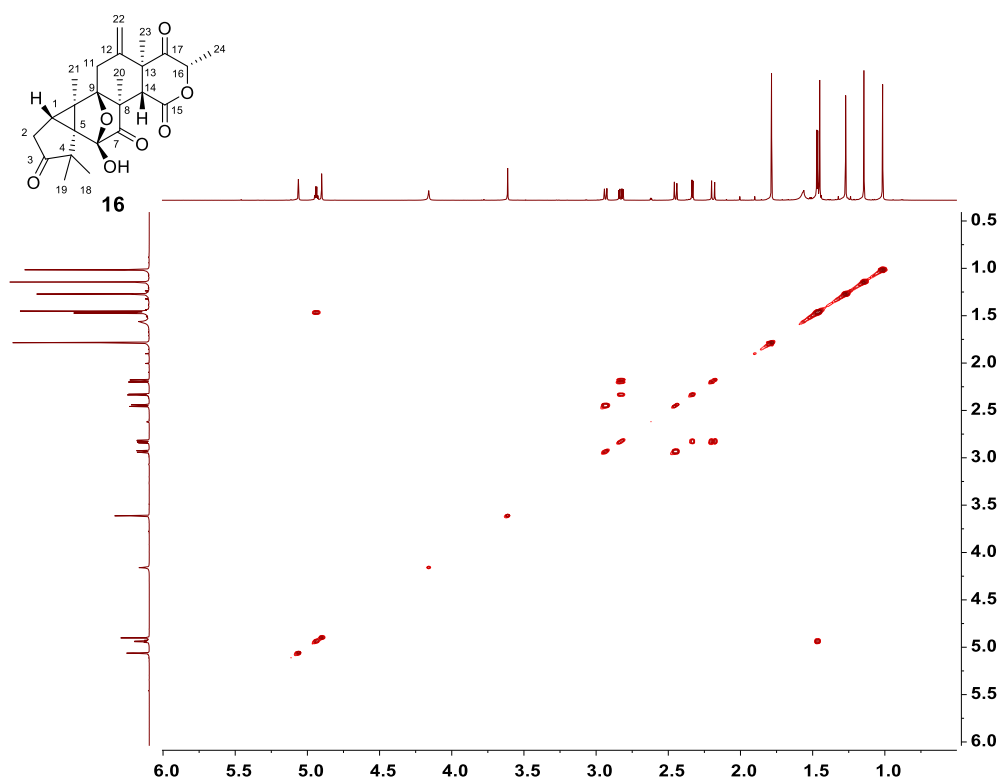

Supplementary Fig. 58 | COSY NMR spectrum of **16** in CDCl<sub>3</sub>.

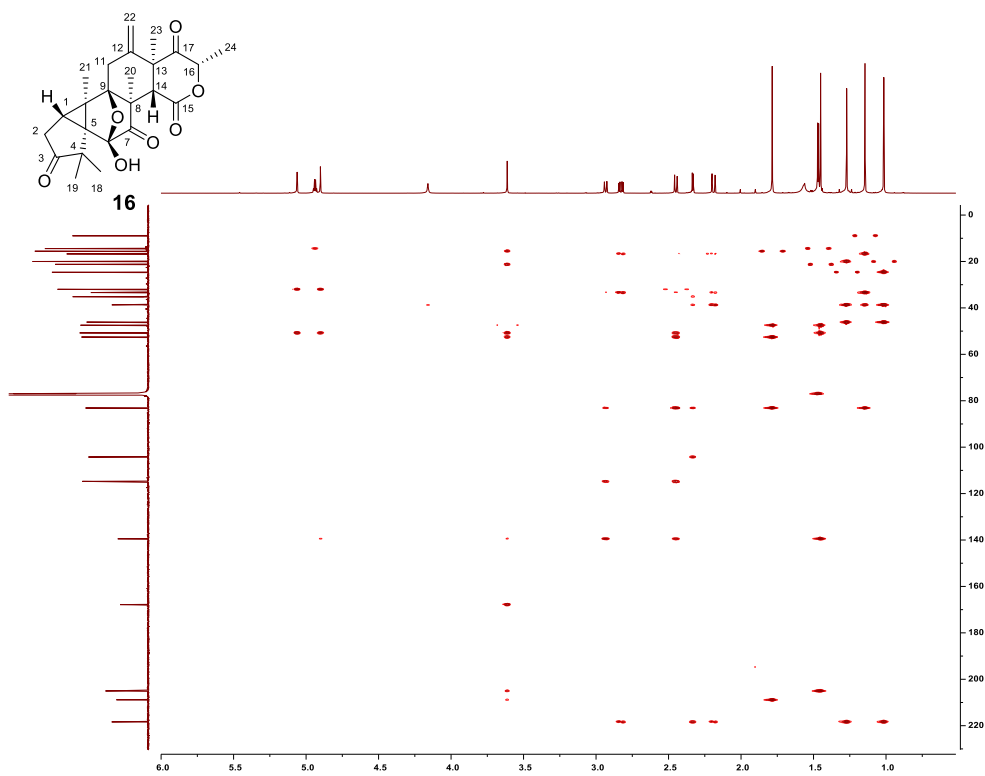

Supplementary Fig. 59 | HMBC NMR spectrum of **16** in CDCl<sub>3</sub>.

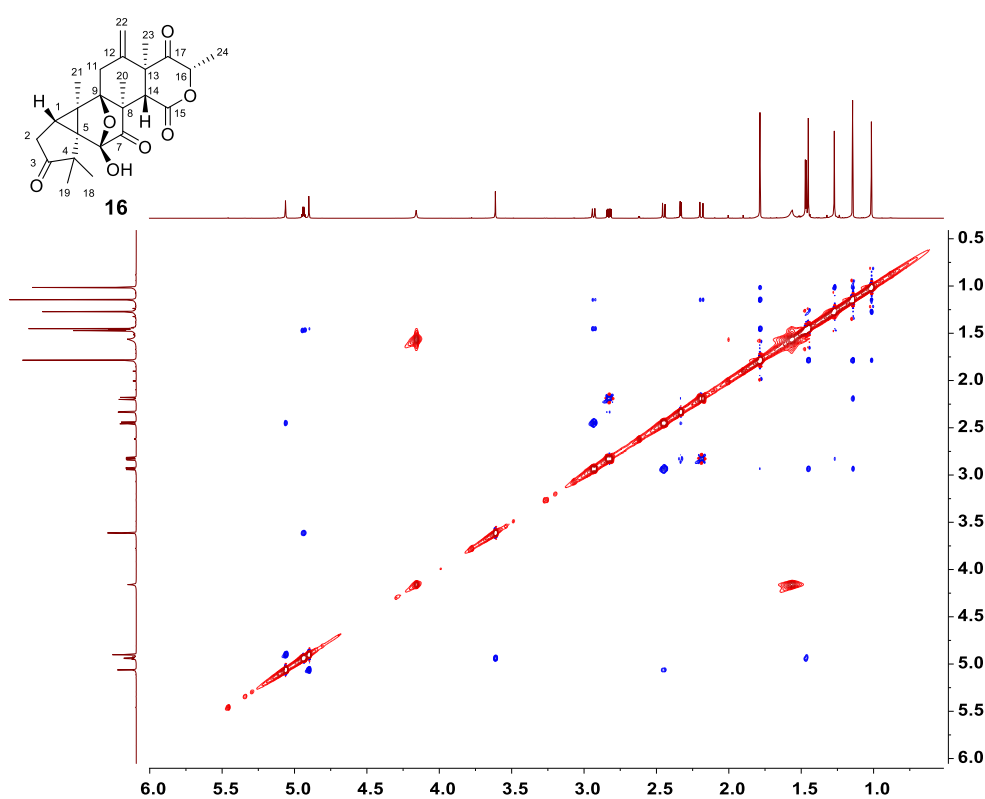

Supplementary Fig. 60 | NOESY NMR spectrum of **16** in CDCl<sub>3</sub>.

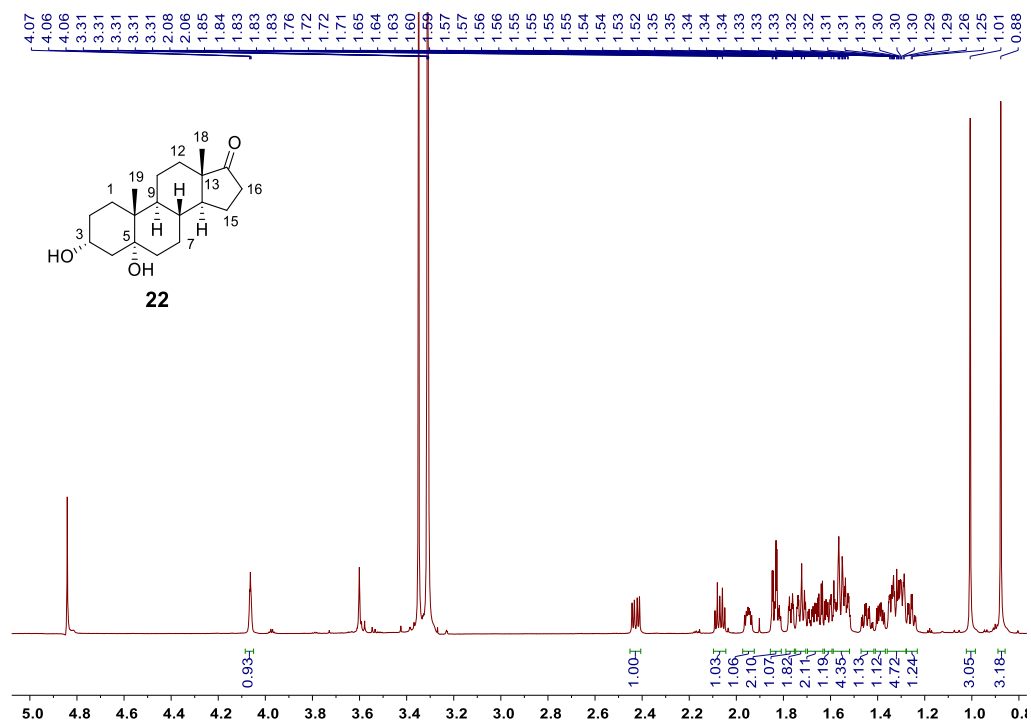

Supplementary Fig. 61 | <sup>1</sup>H NMR spectrum of **22** in CD<sub>3</sub>OD.

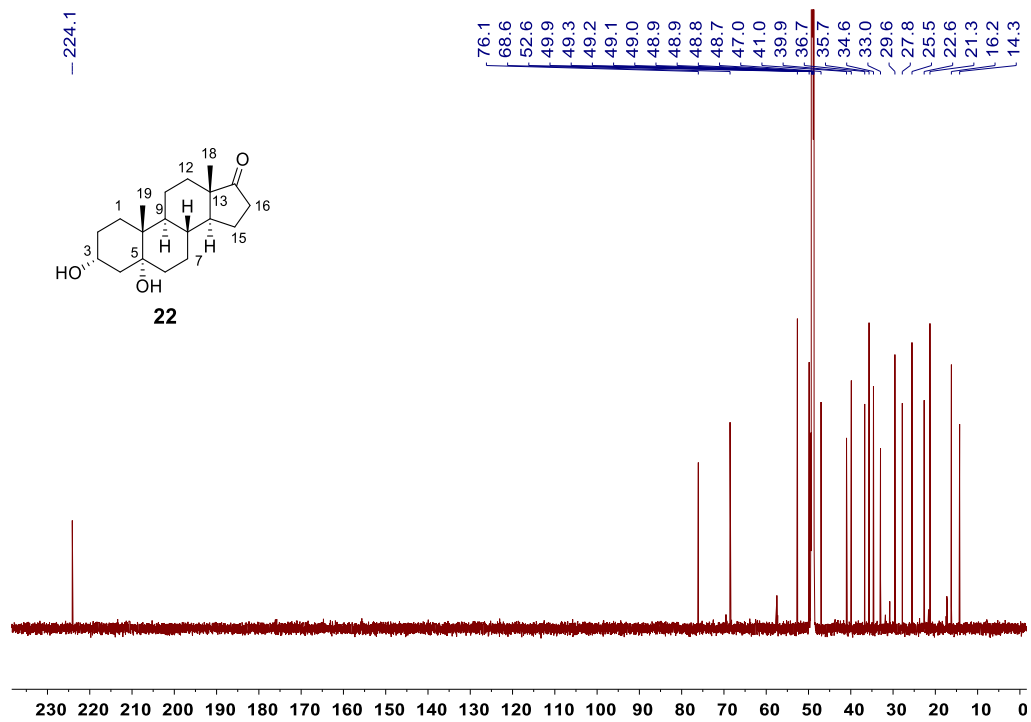

Supplementary Fig. 62 | <sup>13</sup>C NMR spectrum of **22** in CD<sub>3</sub>OD.

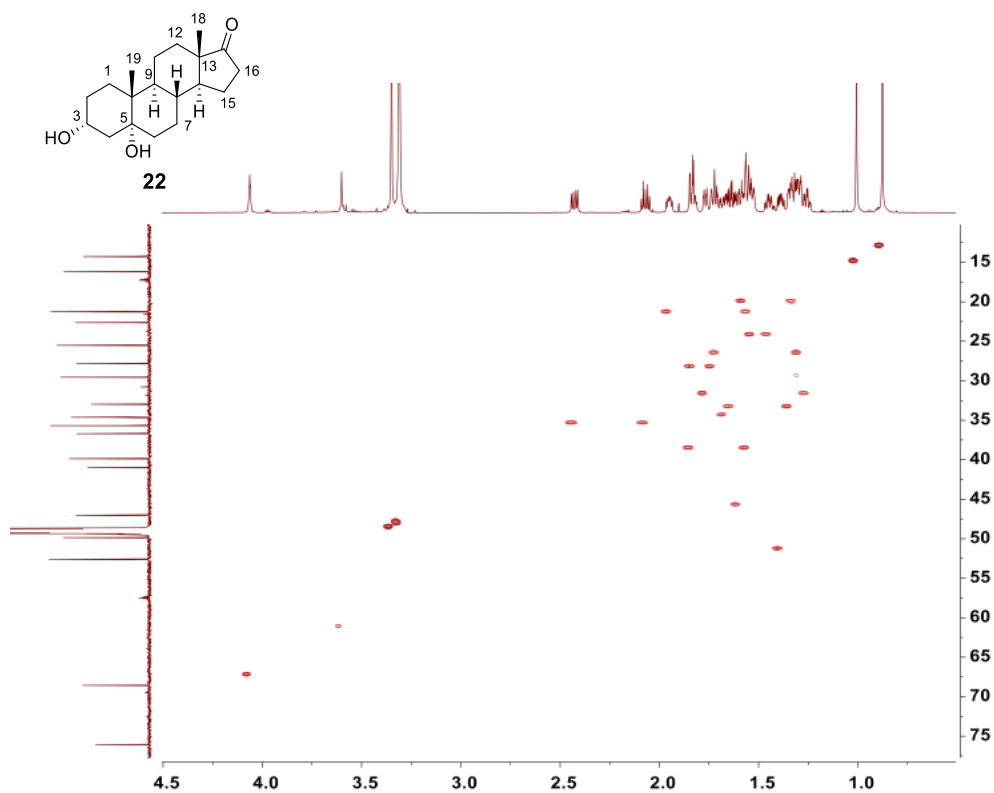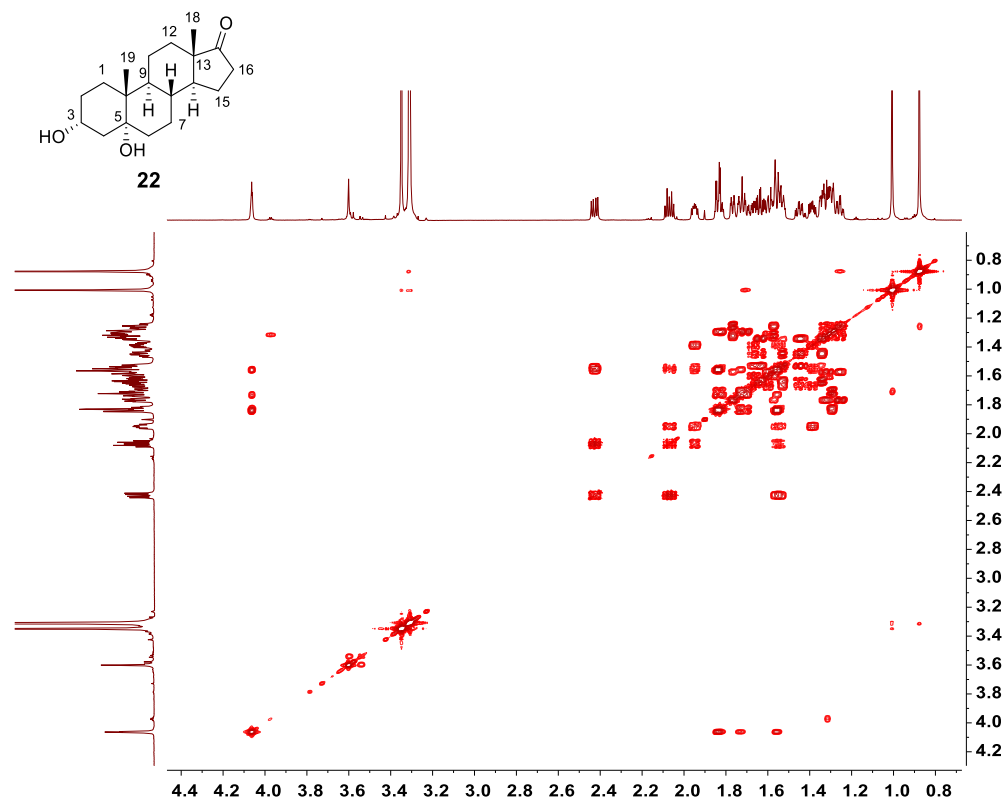

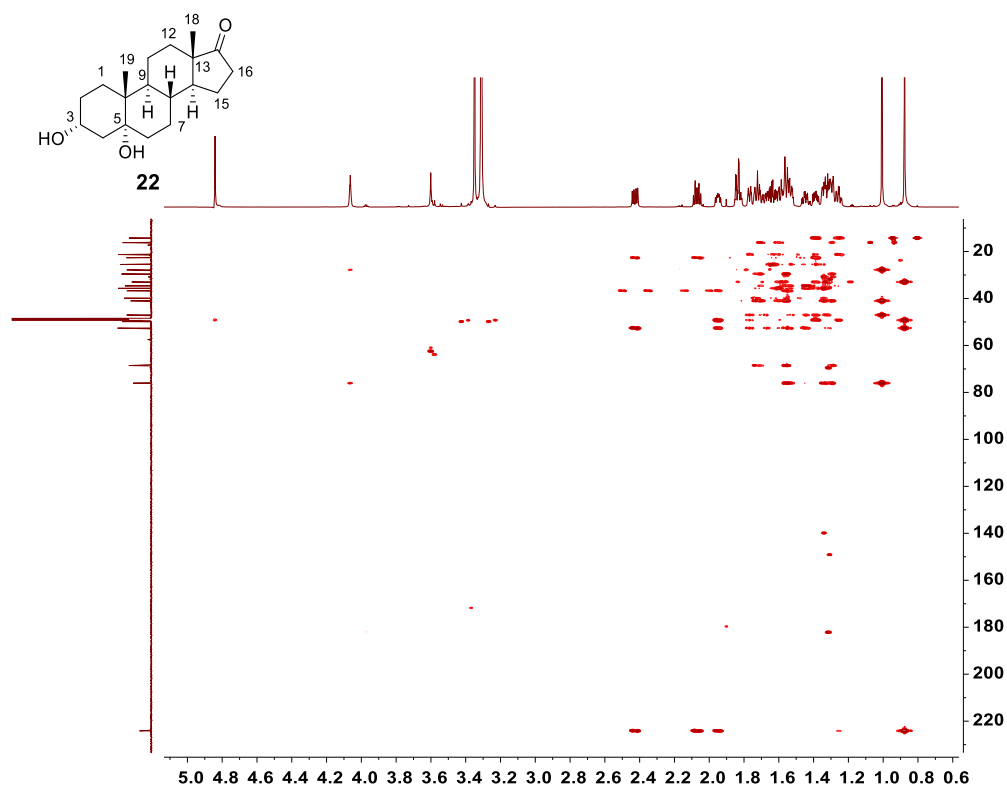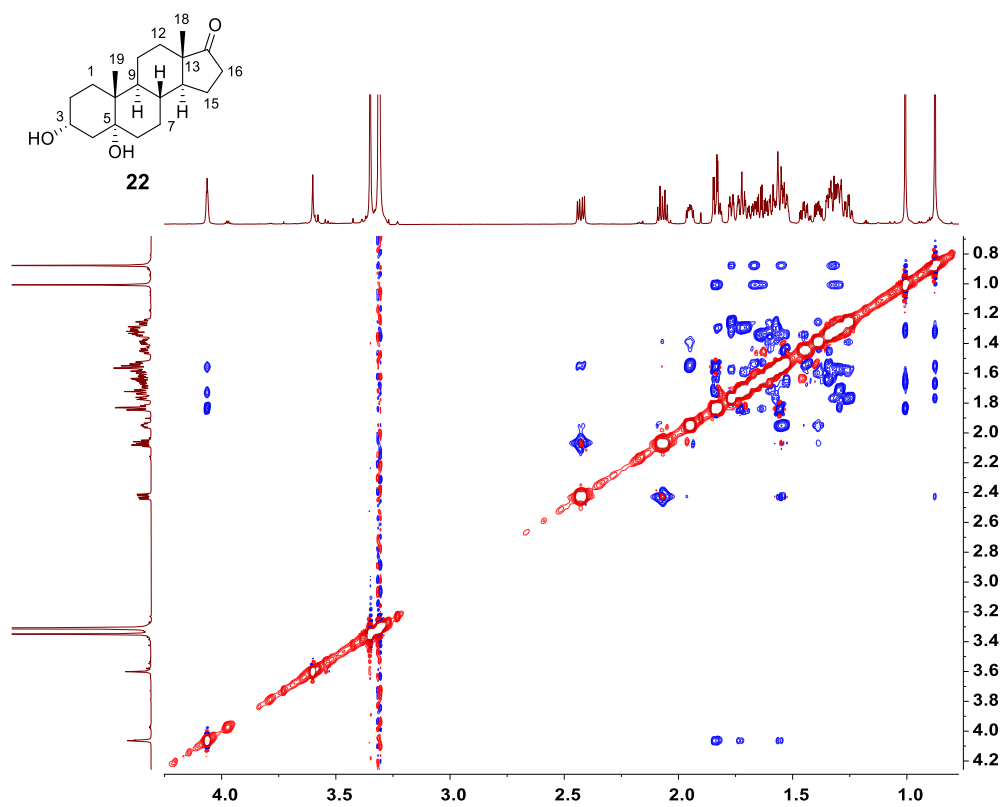



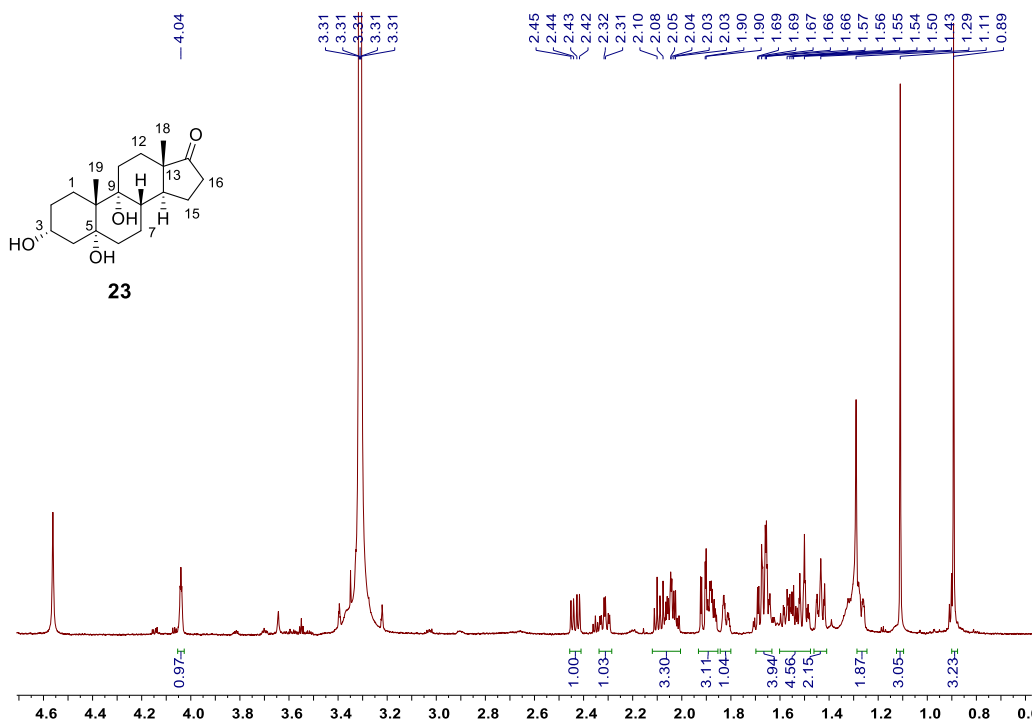

Supplementary Fig. 67 | <sup>1</sup>H NMR spectrum of **23** in CD<sub>3</sub>OD.

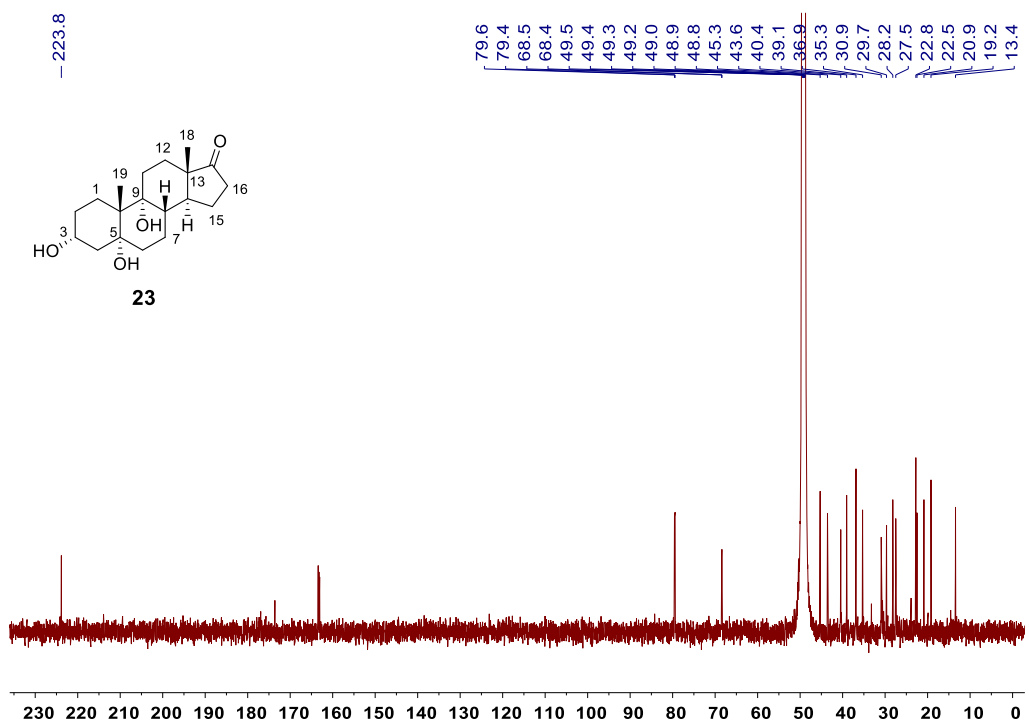

Supplementary Fig. 68 | <sup>13</sup>C NMR spectrum of **23** in CD<sub>3</sub>OD.

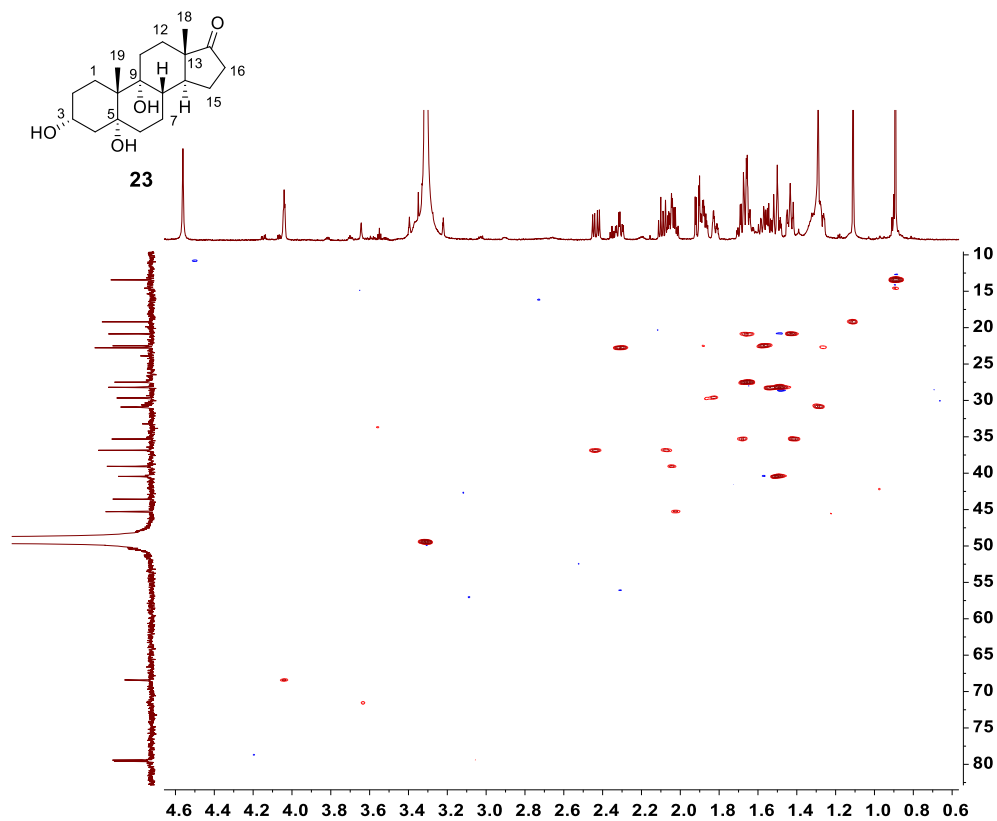

Supplementary Fig. 69 | HSQC spectrum of **23** in  $\text{CD}_3\text{OD}$ .

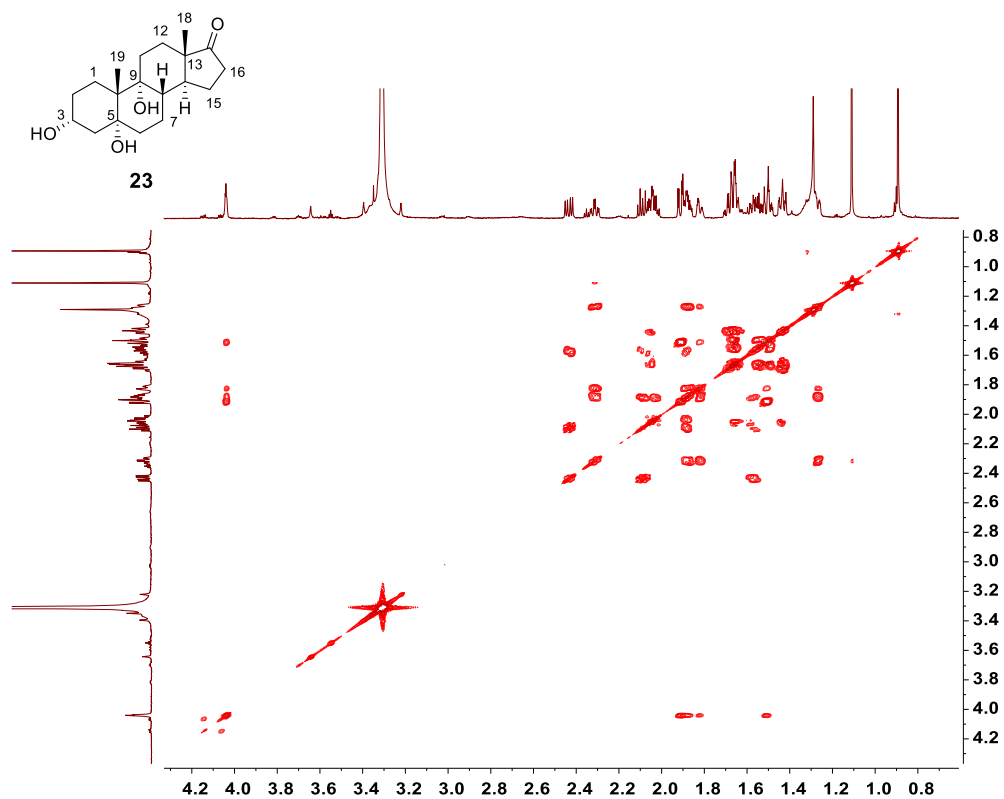

Supplementary Fig. 70 | COSY spectrum of **23** in  $\text{CD}_3\text{OD}$ .

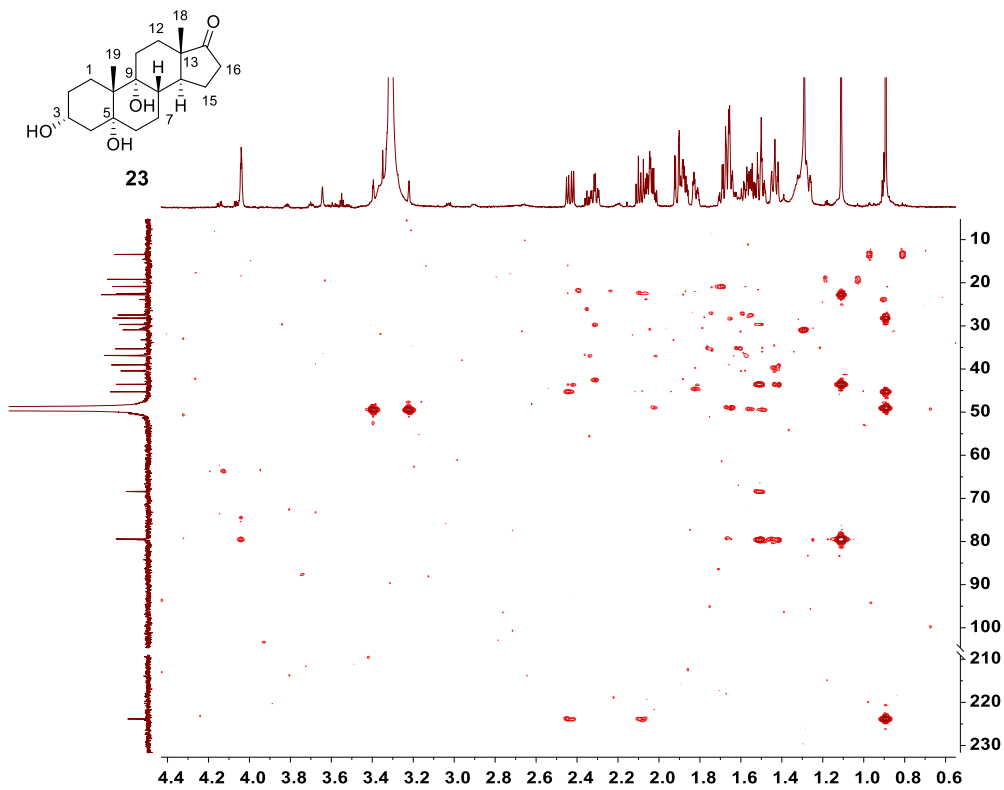

Supplementary Fig. 71 | HMBC spectrum of **23** in CD<sub>3</sub>OD.

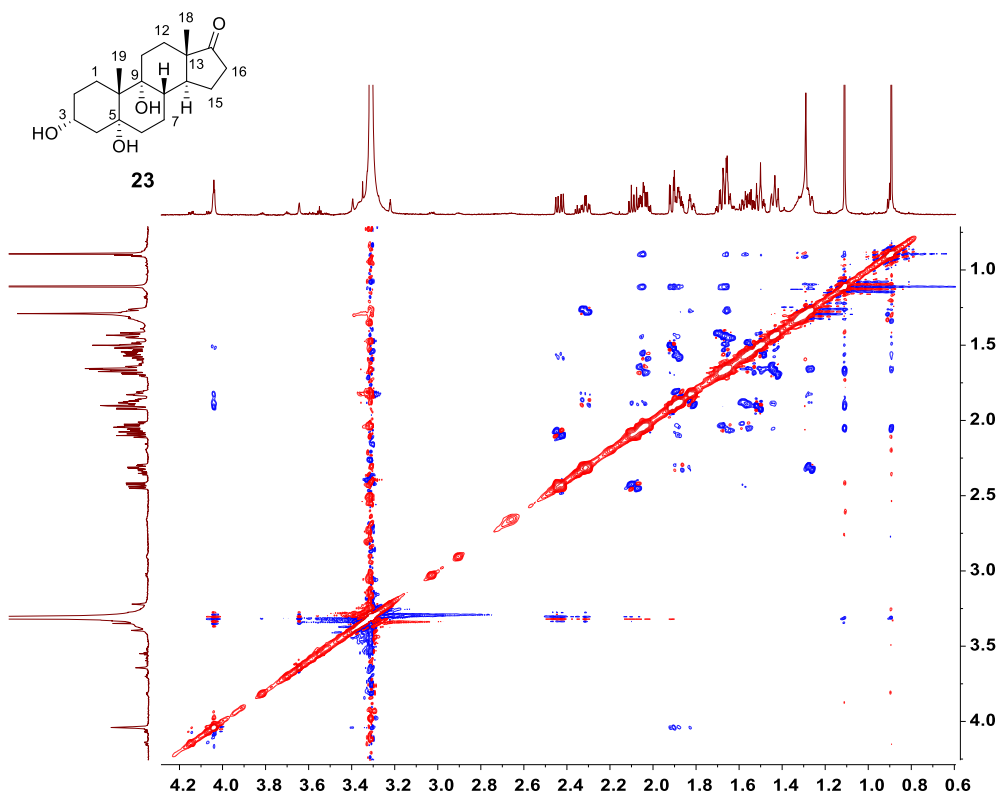

Supplementary Fig. 72 | NOESY spectrum of **23** in CD<sub>3</sub>OD.

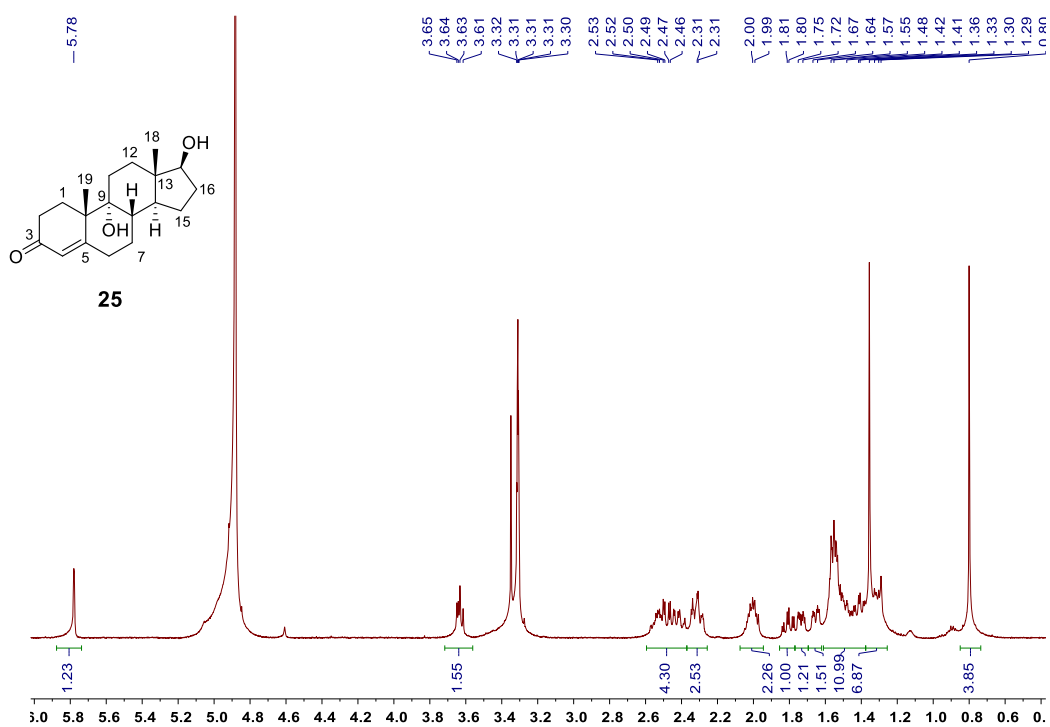

Supplementary Fig. 73 | <sup>1</sup>H NMR spectrum of **25** in CD<sub>3</sub>OD.

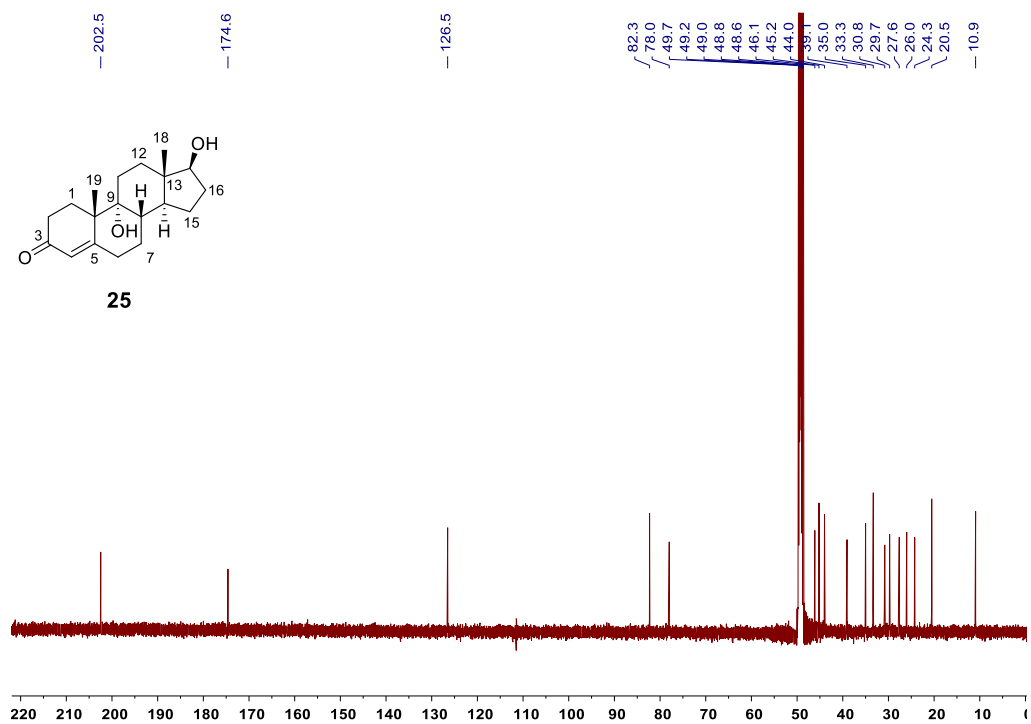

Supplementary Fig. 74 | <sup>13</sup>C NMR spectrum of **25** in CD<sub>3</sub>OD.

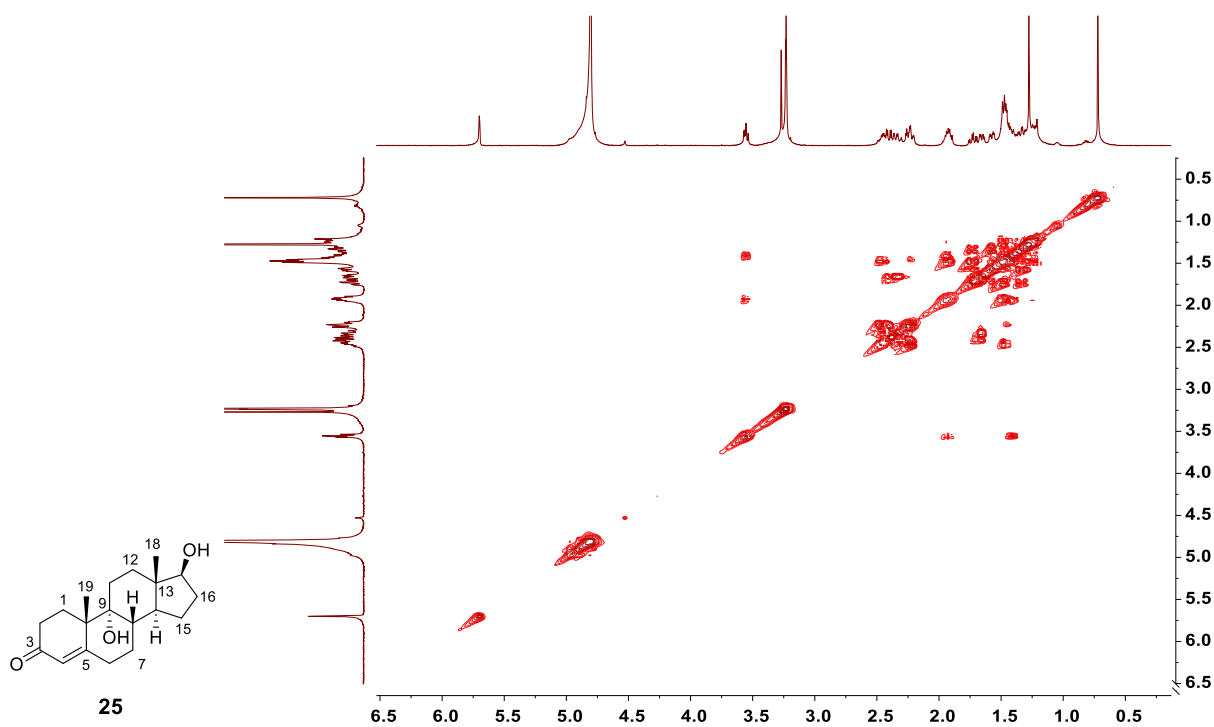

Supplementary Fig. 75 | COSY NMR spectrum of **25** in CD<sub>3</sub>OD.

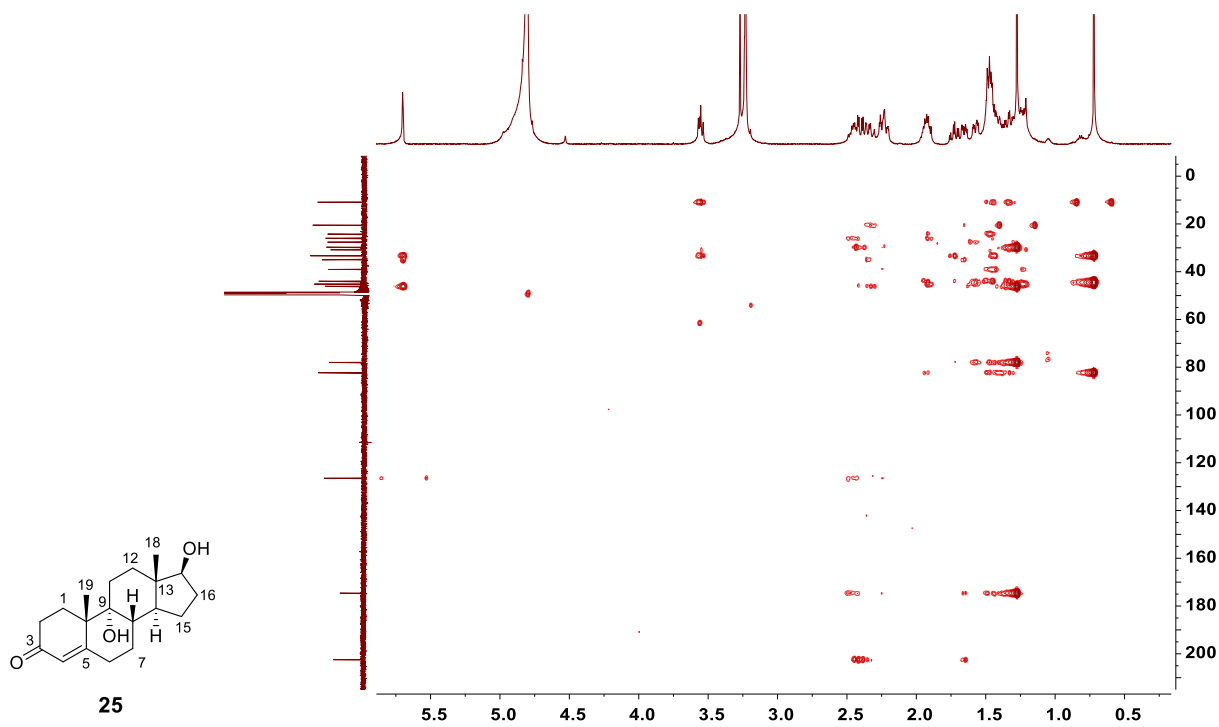

Supplementary Fig. 76 | HMBC NMR spectrum of **25** in CD<sub>3</sub>OD.

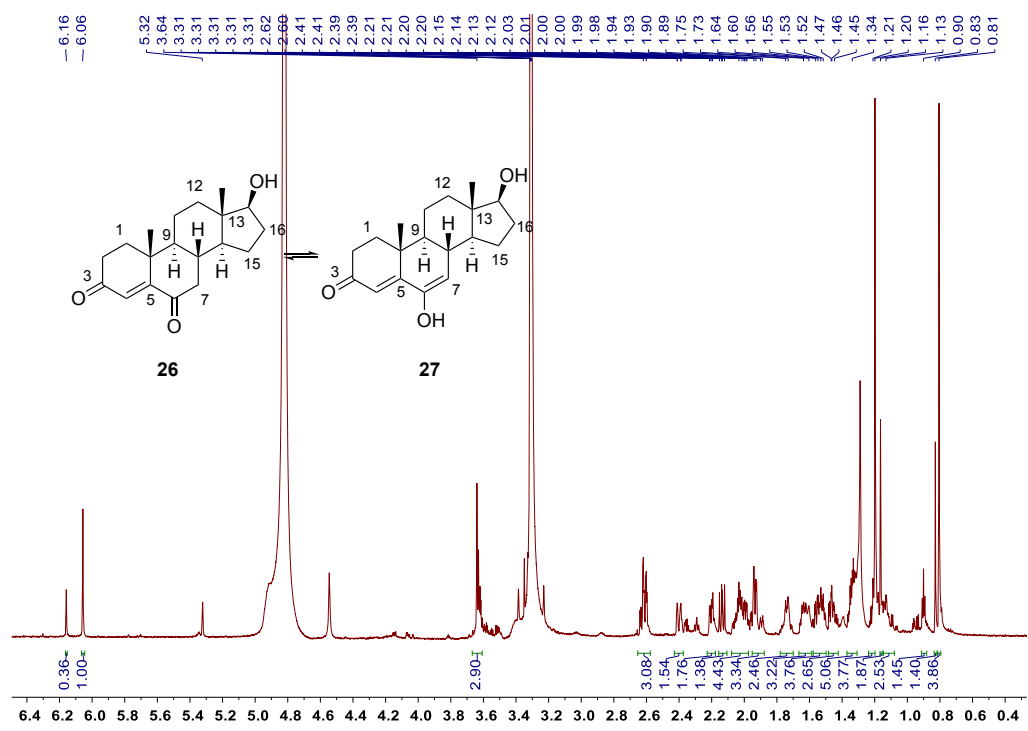

Supplementary Fig. 77 | <sup>1</sup>H NMR spectrum of **26/27** in CD<sub>3</sub>OD.

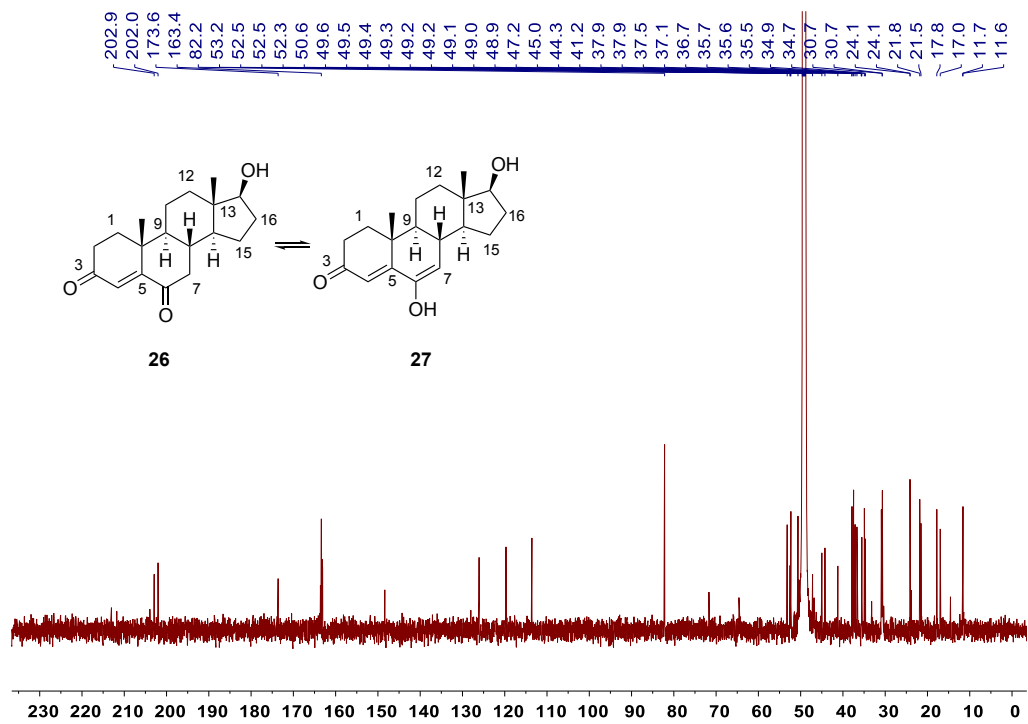

Supplementary Fig. 78 | <sup>13</sup>C NMR spectrum of **26/27** in CD<sub>3</sub>OD.

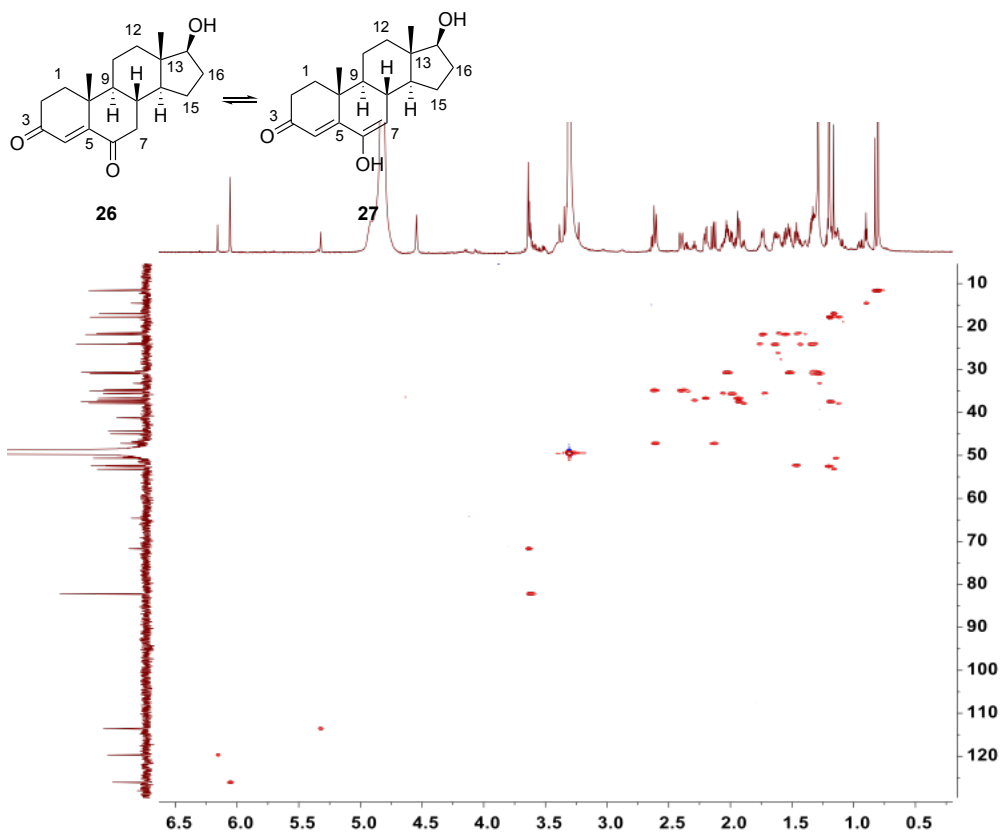

Supplementary Fig. 79 | HSQC NMR spectrum of **26/27** in CD<sub>3</sub>OD.

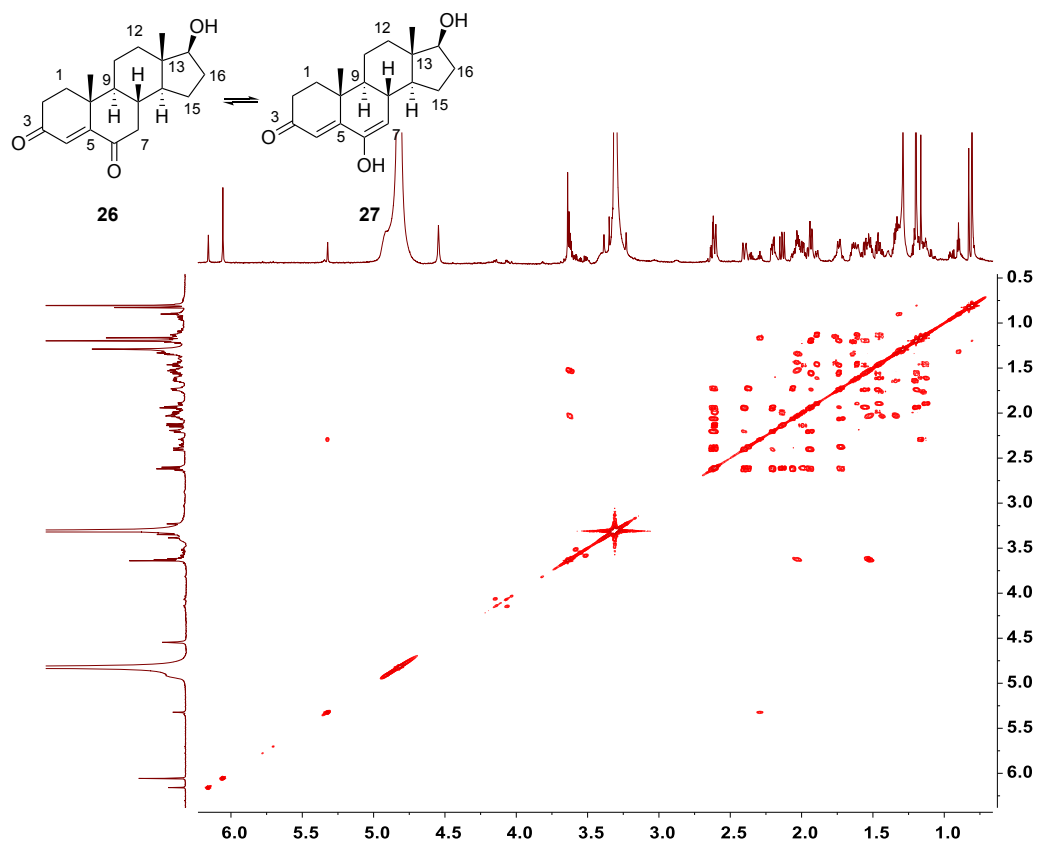

Supplementary Fig. 80 | COSY NMR spectrum of **26/27** in CD<sub>3</sub>OD.

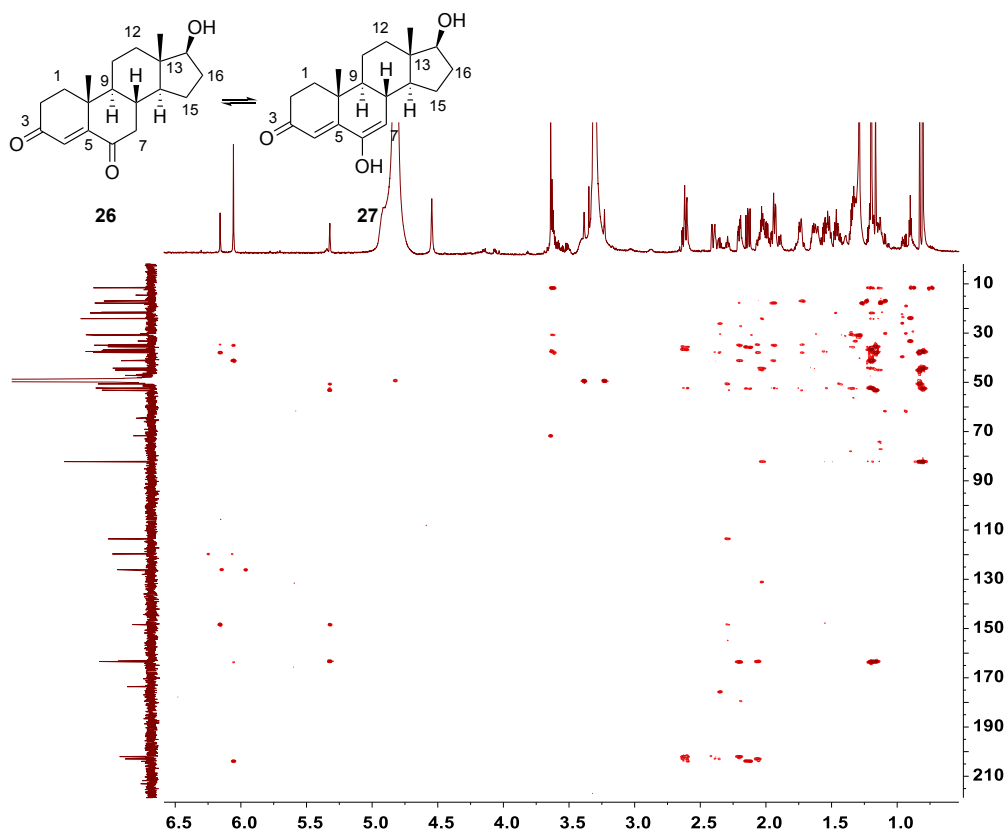

Supplementary Fig. 81 | HMBC NMR spectrum of **26/27** in CD<sub>3</sub>OD.

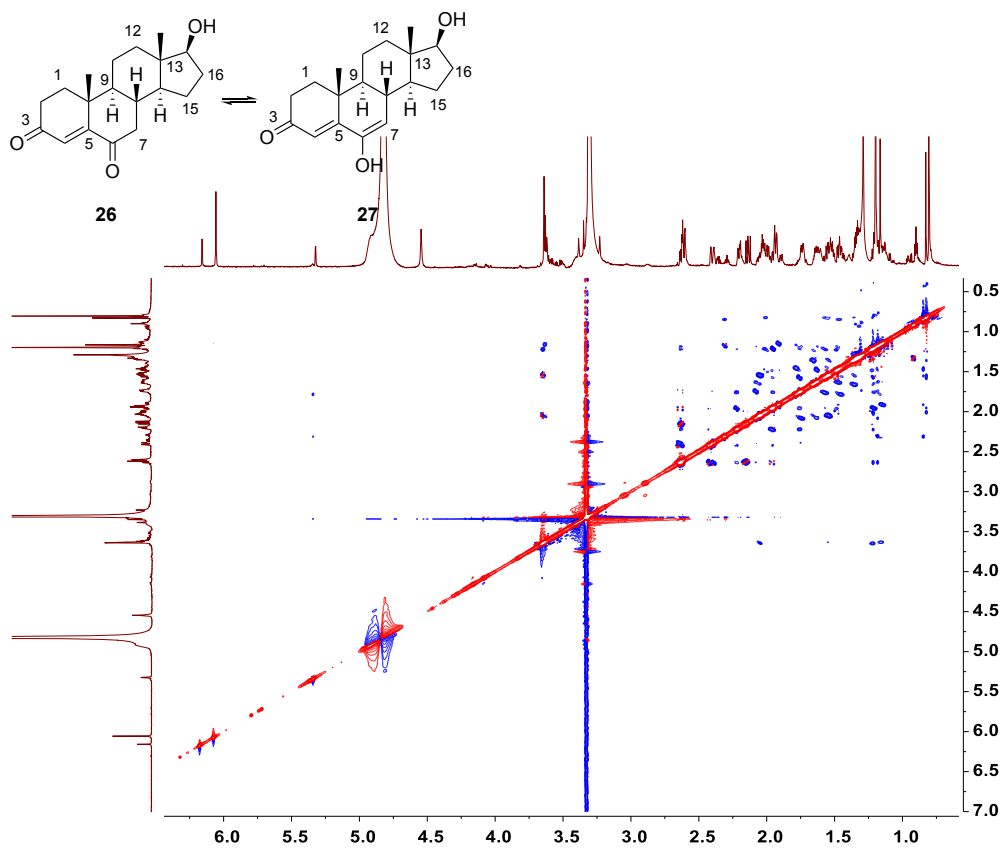

Supplementary Fig. 82 | NOESY NMR spectrum of **26/27** in CD<sub>3</sub>OD.



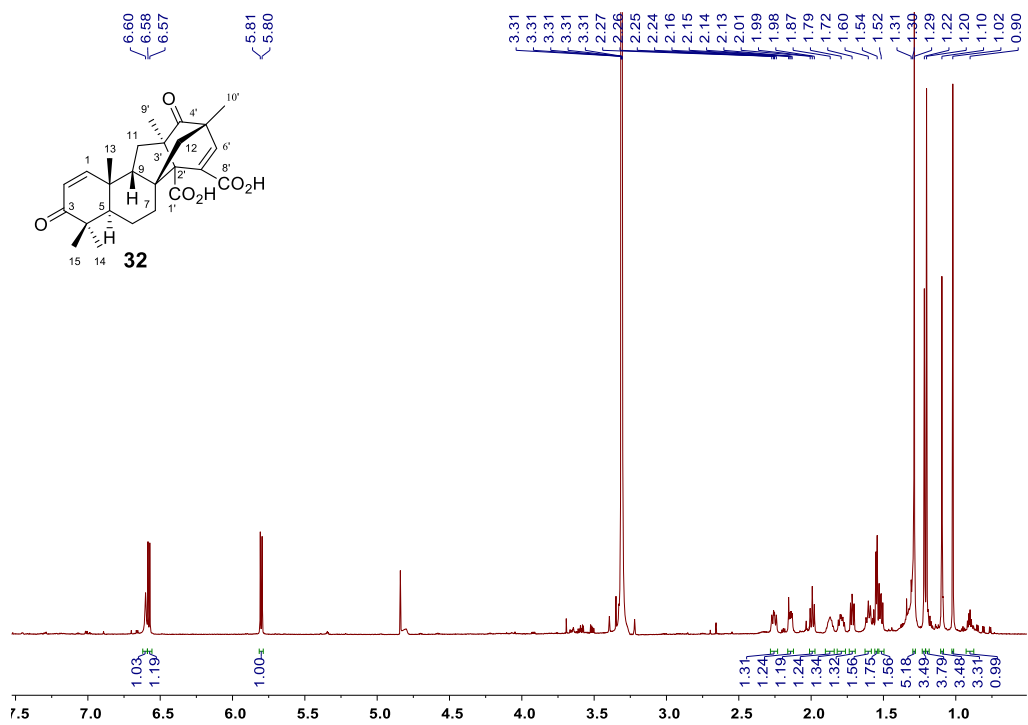

**Supplementary Fig. 83** |  $^1\text{H}$  NMR spectrum of **32** in  $\text{CD}_3\text{OD}$ .

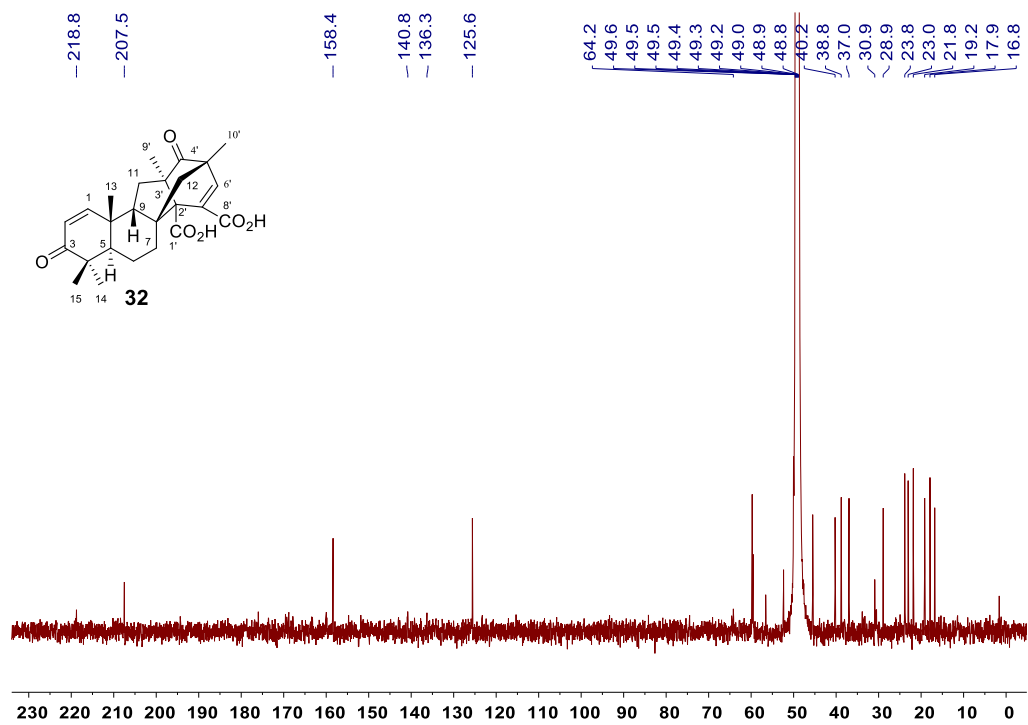

**Supplementary Fig. 84** |  $^{13}\text{C}$  NMR spectrum of **32** in  $\text{CD}_3\text{OD}$ .

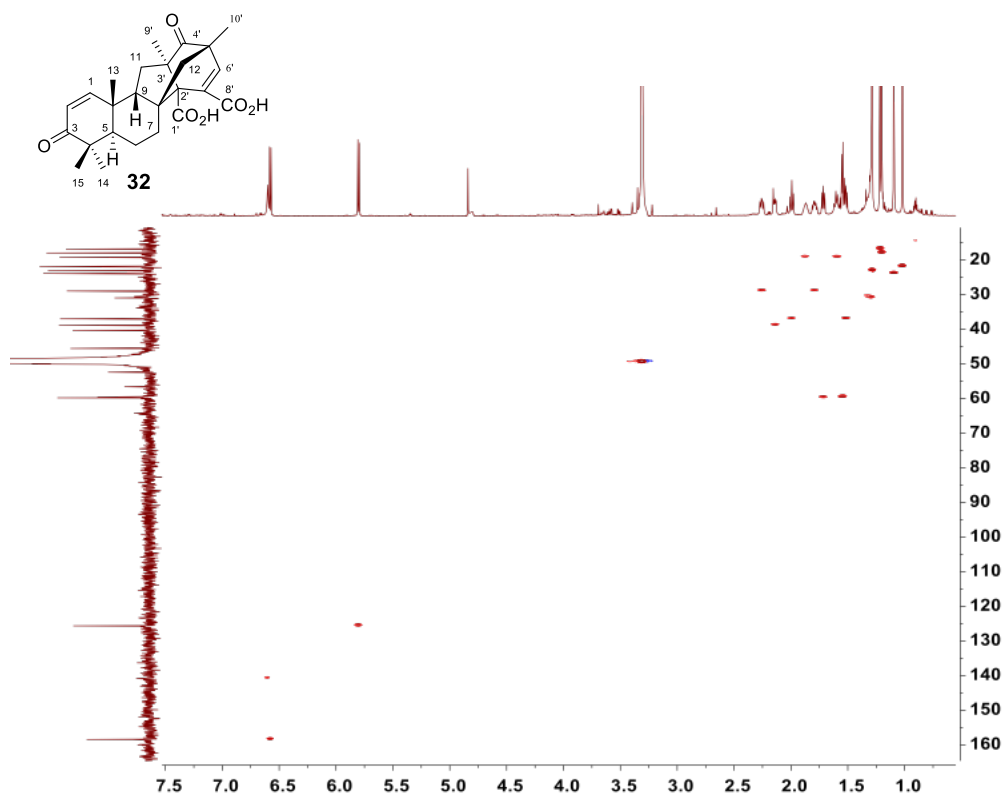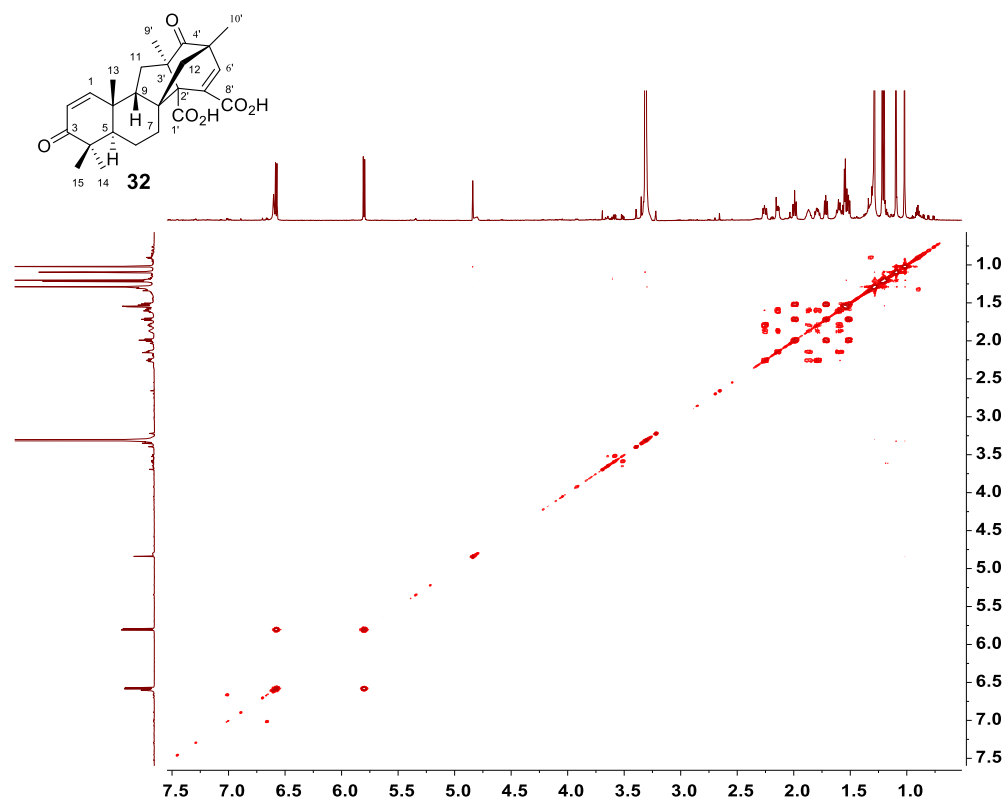

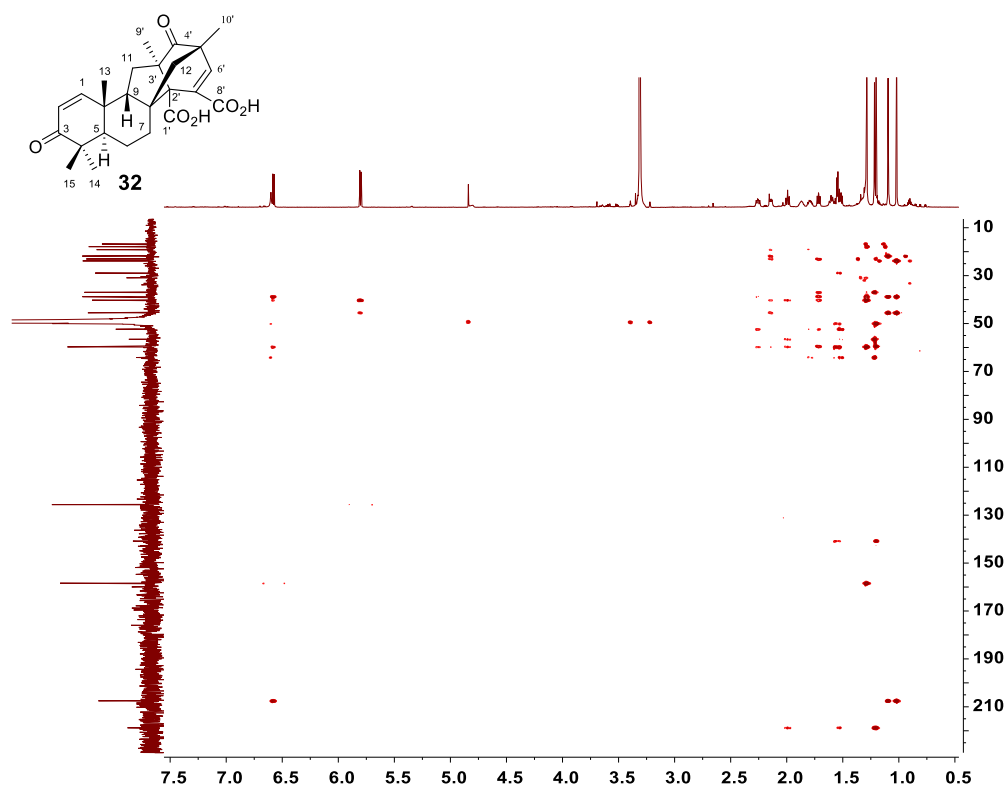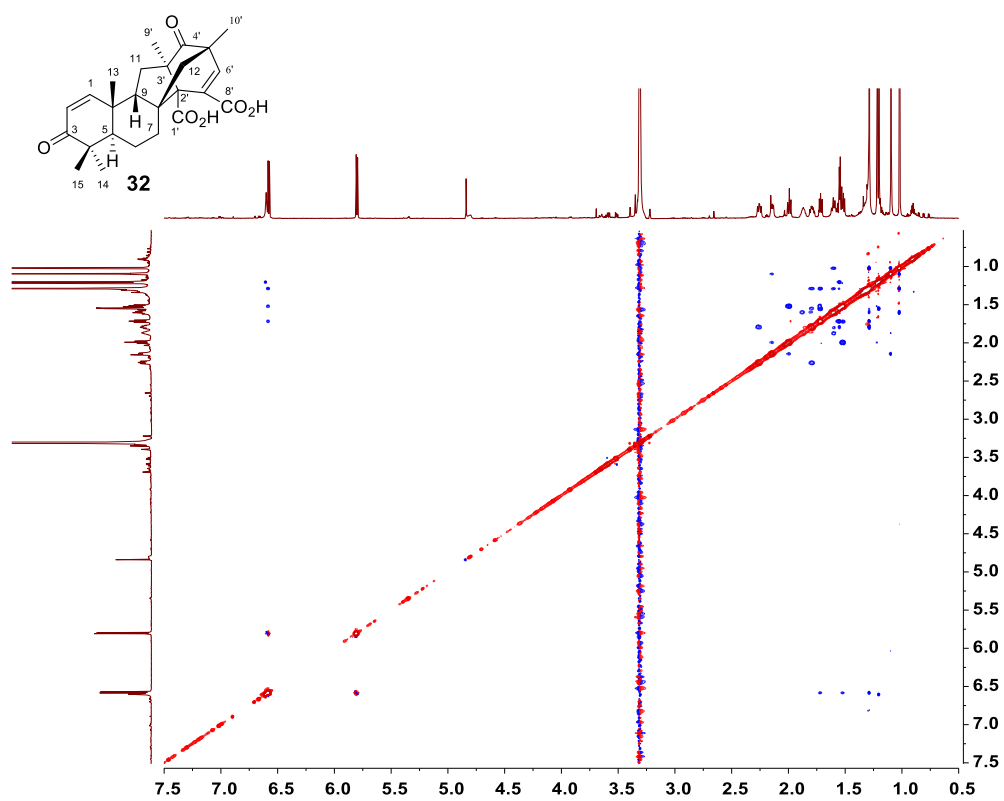

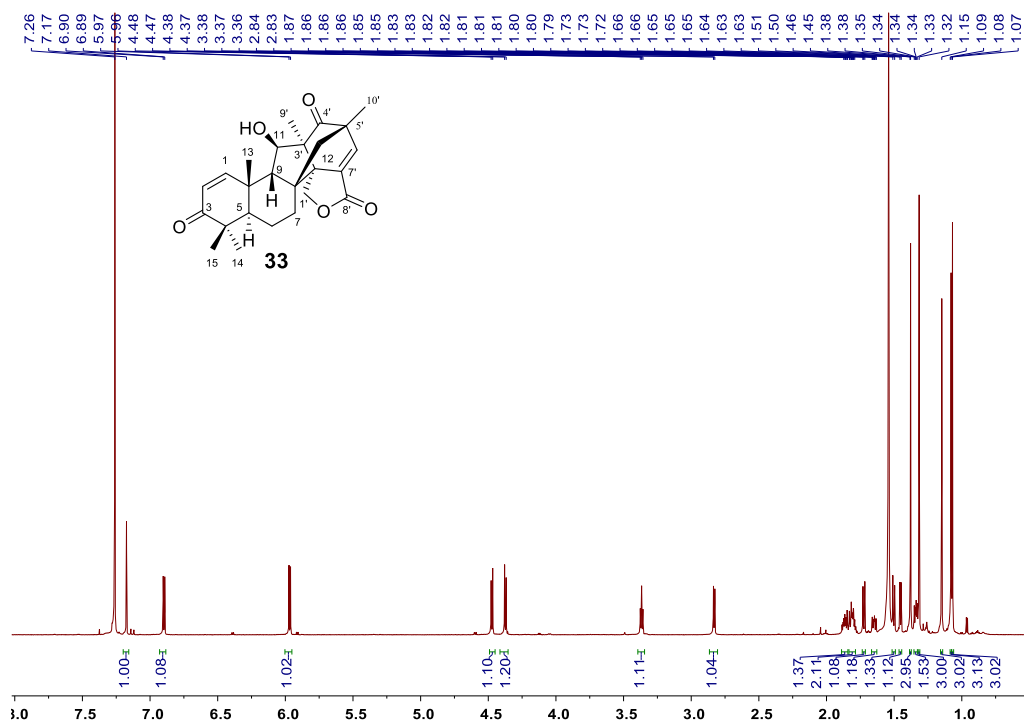

Supplementary Fig. 89 |  $^1\text{H}$  NMR spectrum of **33** in  $\text{CDCl}_3$ .

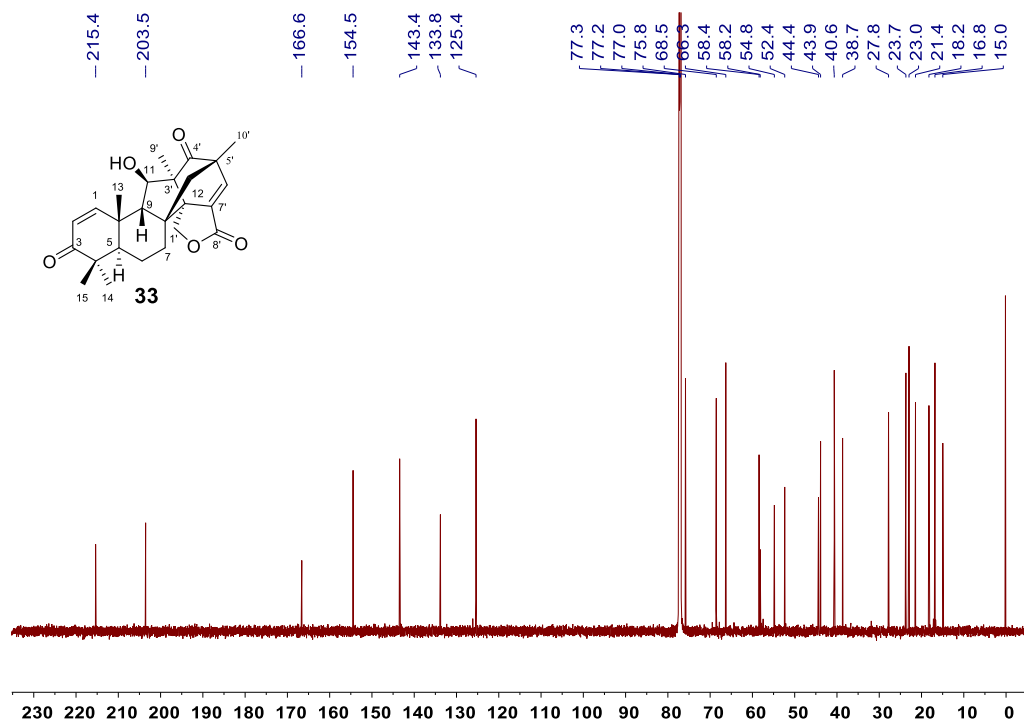

Supplementary Fig. 90 |  $^{13}\text{C}$  NMR spectrum of **33** in  $\text{CDCl}_3$ .

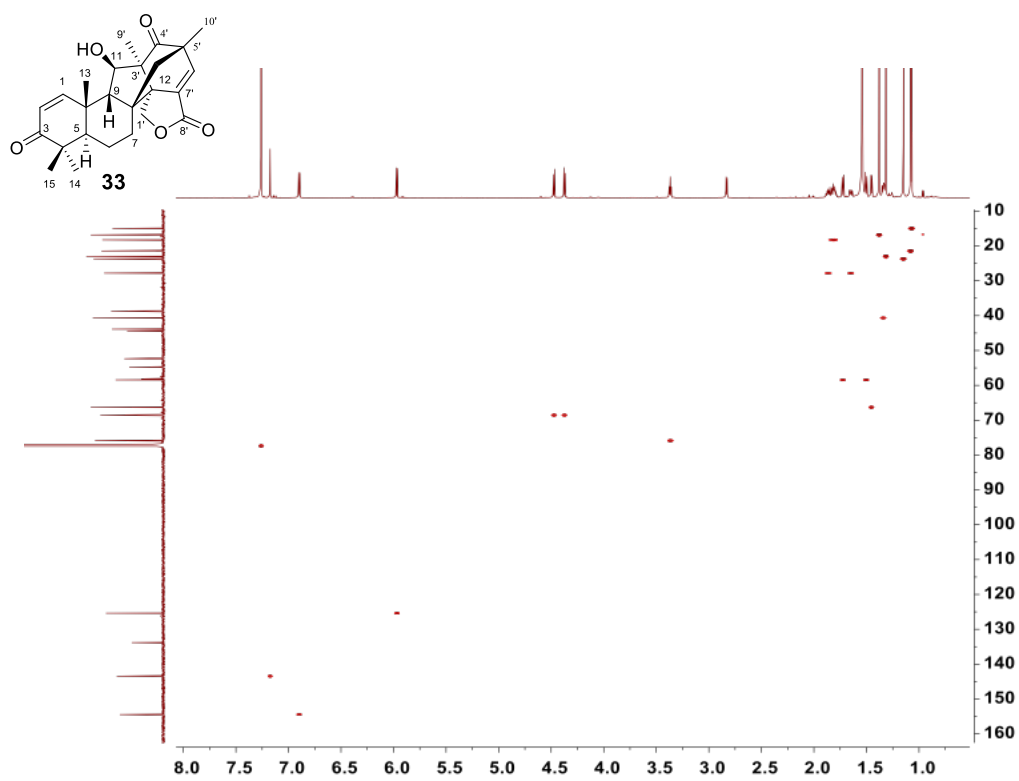

Supplementary Fig. 91 | HSQC NMR spectrum of **33** in CDCl<sub>3</sub>.

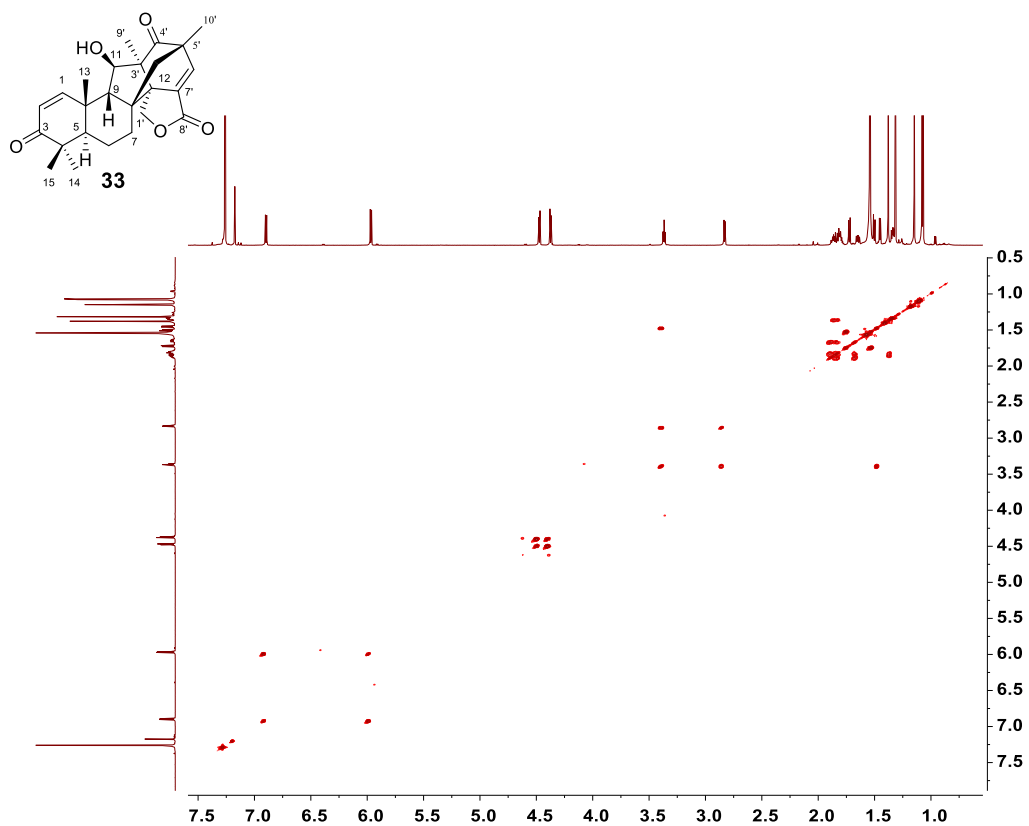

Supplementary Fig. 92 | COSY NMR spectrum of **33** in CDCl<sub>3</sub>.

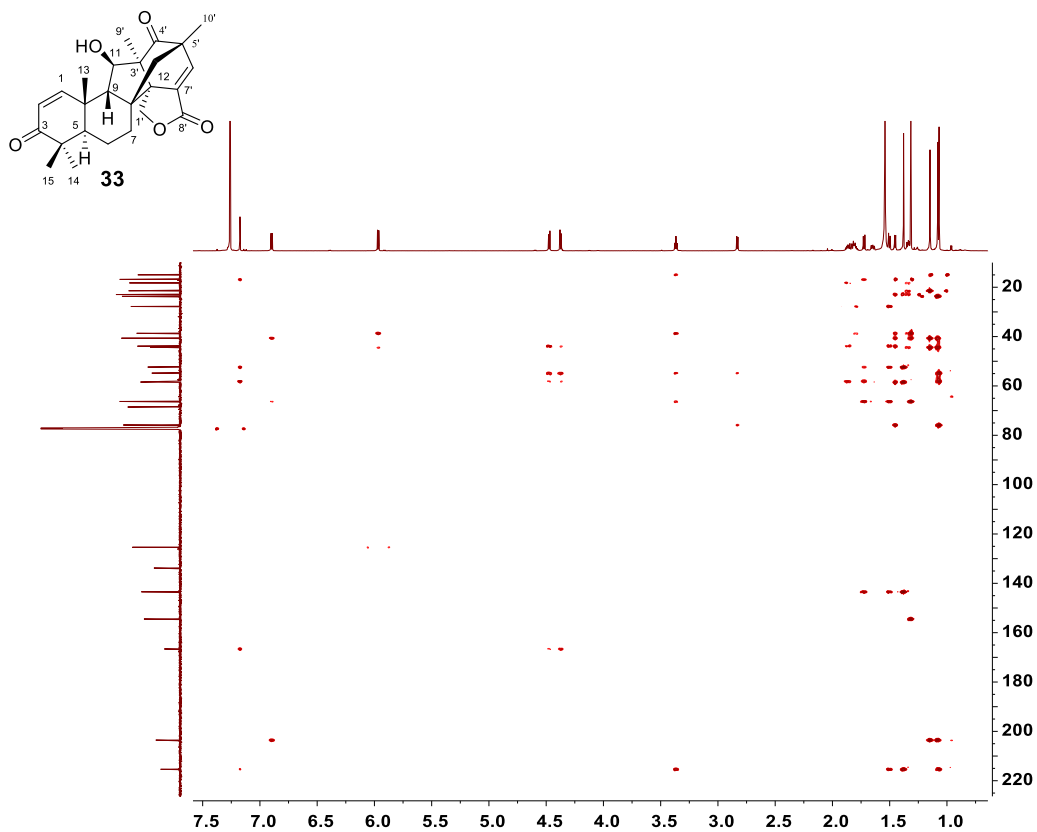

Supplementary Fig. 93 | HMBC NMR spectrum of **33** in CDCl<sub>3</sub>.

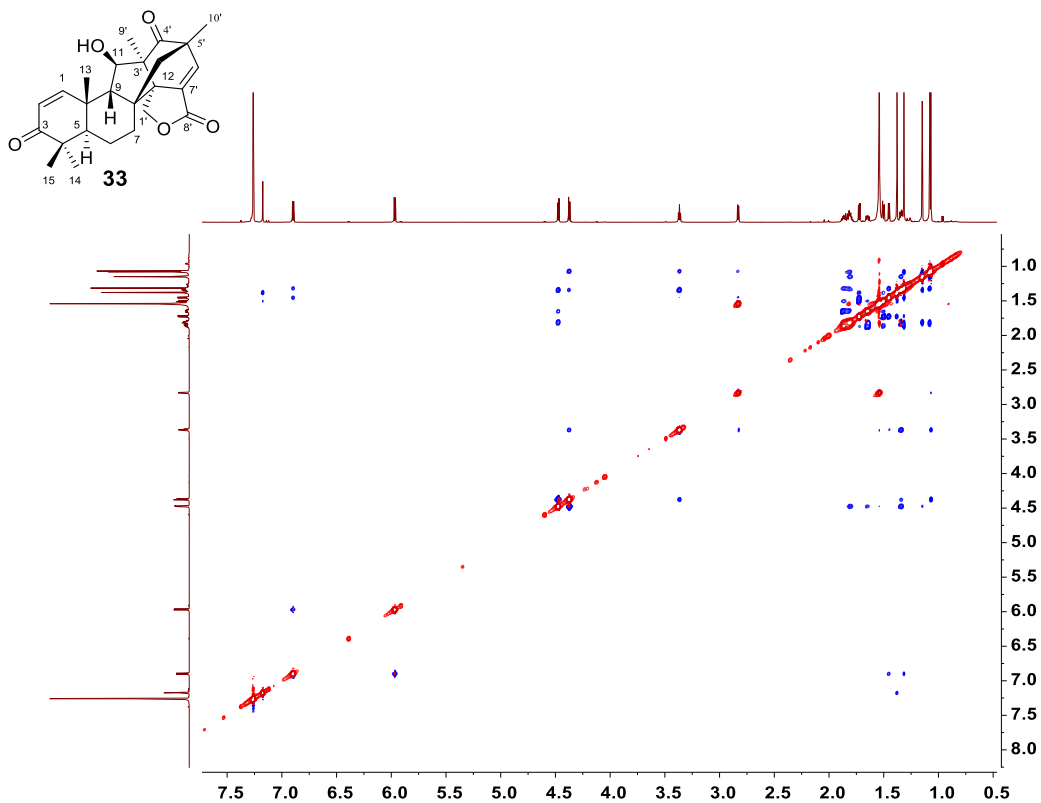

Supplementary Fig. 94 | NOESY NMR spectrum of **33** in CDCl<sub>3</sub>.

## Reference

- 1 Bai, T. *et al.* Structural Diversification of Andiconin-Derived Natural Products by  $\alpha$ -Ketoglutarate-Dependent Dioxygenases. *Org. Lett.* **22**, 4311-4315 (2020).
